# Supplementary material for: Design, Synthesis, and Antitumor Activity Evaluation of Proteolysis-Targeting Chimeras as Degraders of Extracellular Signal-Regulated Kinases 1/2
Source: MDPI journal article supplement (doi:10.3390/ijms242216290), 2023-11-14
Supplement: s1 [file s1]

---

## Supporting information

# Design, Synthesis, and Antitumor Activity Evaluation of Proteolysis-Targeting Chimeras as Degradable of Extracellular Signal-Regulated Kinases 1/2

Pengming Pan, Yichao He, Tongtong Geng, Zhongtang Li, Zhongjun Li and Xiangbao Meng \*

State Key Laboratory of Natural and Biomimetic Drugs, School of  
Pharmaceutical Sciences, Peking University, Beijing 100191, China

\* Correspondence: xbmeng@bjmu.edu.cn

## Contents

|                                                              |        |
|--------------------------------------------------------------|--------|
| 1. Docking result.....                                       | 2-3    |
| 2. Determination of DC <sub>50</sub> for <b>B1-10J</b> ..... | 3      |
| 3. Supplementary figure for xenograft experiment.....        | 4      |
| 4. Synthesis of compounds.....                               | 4-30   |
| 5. <sup>1</sup> H NMR and <sup>13</sup> C NMR spectrum.....  | 30-72  |
| 6. HRMS spectrum.....                                        | 73-87  |
| 7. HPLC spectrum.....                                        | 87-103 |

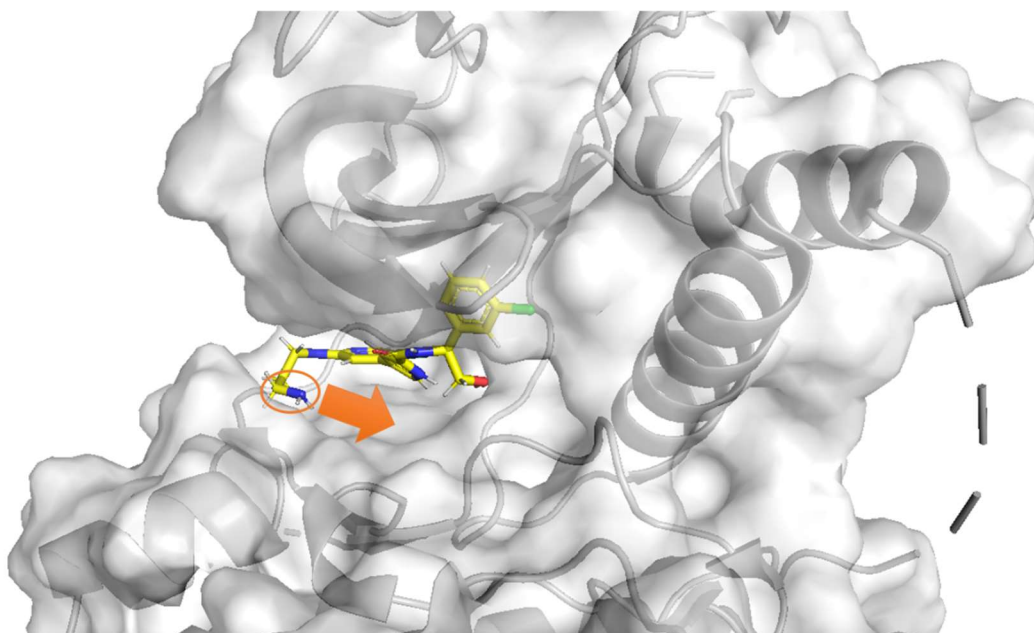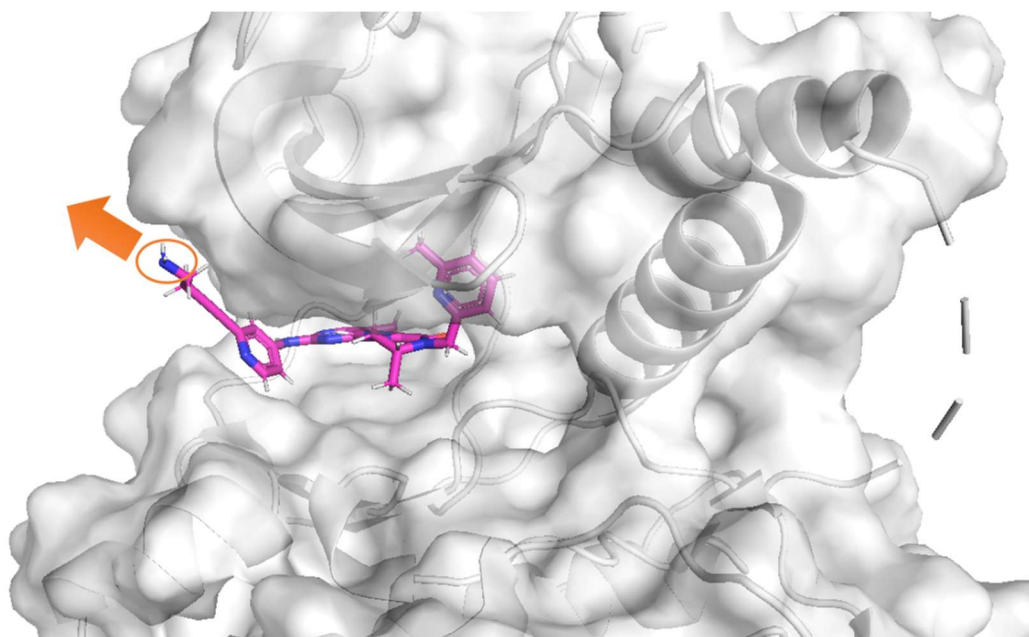

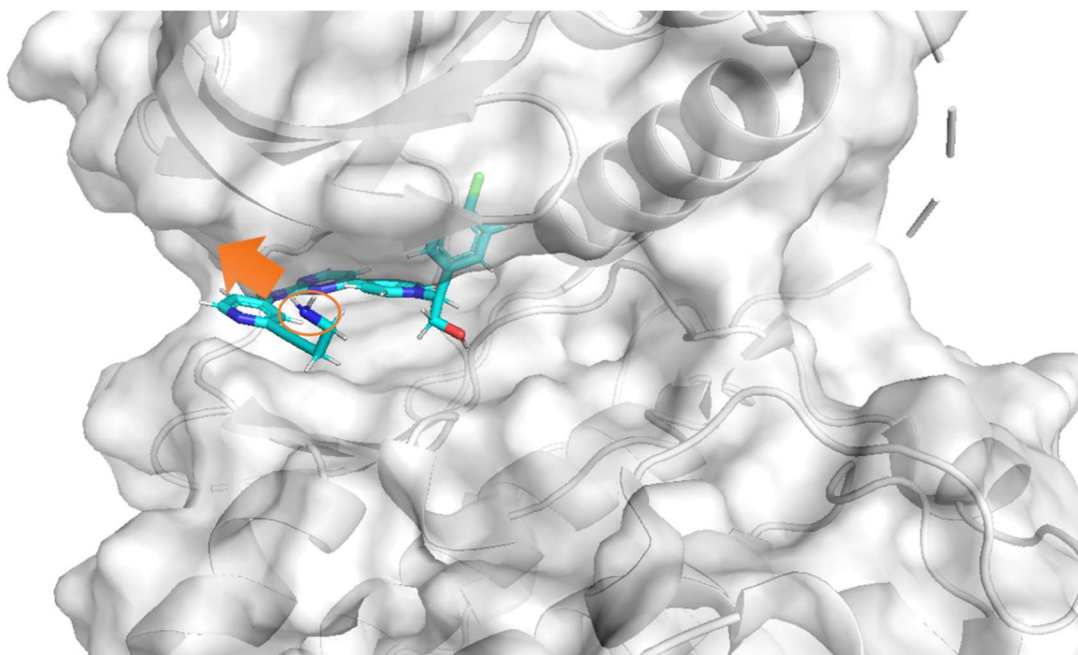

**Figure S1.** Docking model of the modified inhibitors to ERK1/2 (PDB: 6gdq).

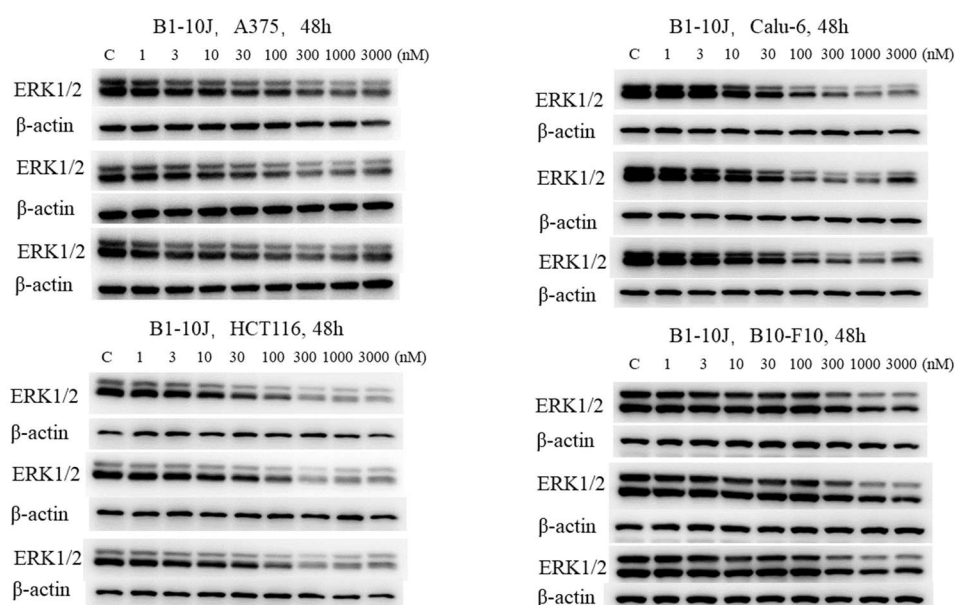

**Figure S2.** Wide applicability of BI-10J in various human tumor cells. Cells were treated with the indicated concentrations of BI-10J for 48 h before western blot.

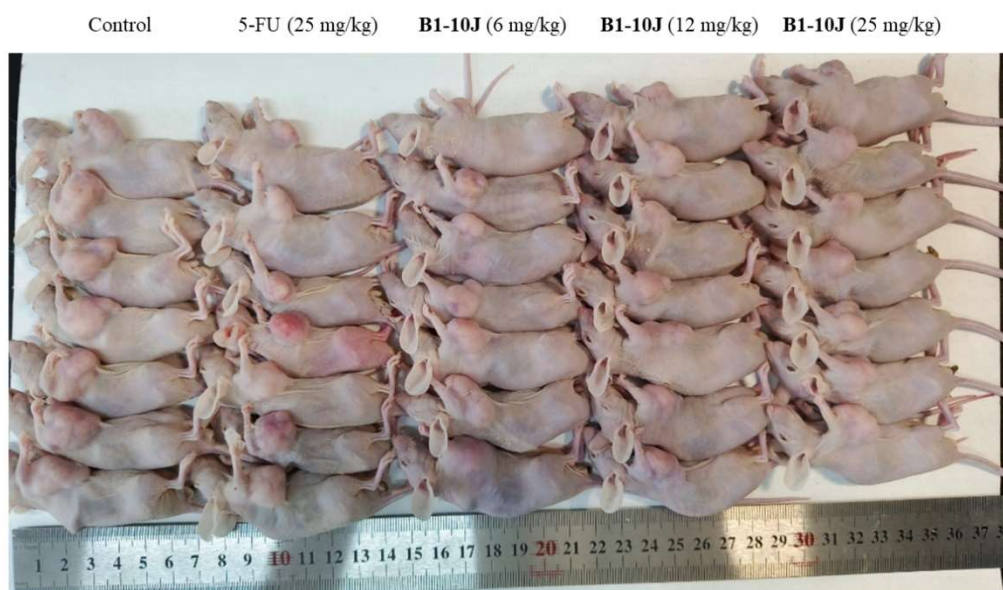

**Figure S3.** The antitumor activity of B1-10J in a HCT116 subcutaneous xenograft model.

## 4. Synthesis of compounds

### 4.1. Chemistry

#### 4.1.1. Synthesis of intermediates.

##### 4.1.1.1. *(E)*-7-(2,6-dimethoxy-4-(3-oxo-3-(6-oxo-3,6-dihydropyridin-1(2H)-yl)prop-1-en-1-yl)phenoxy)heptanoic acid (**7**)

Using a method similar to the one reported in literature[21]. White solid; m.p. 97-98°C;  $^1\text{H}$  NMR (400 MHz,  $\text{CDCl}_3$ )  $\delta$  9.29 (s, 1H), 7.68 (d,  $J = 15.5$  Hz, 1H), 7.41 (d,  $J = 15.5$  Hz, 1H), 6.94 (dt,  $J = 9.3, 4.2$  Hz, 1H), 6.80 (s, 2H), 6.05 (dt,  $J = 9.7, 1.7$  Hz, 1H), 4.06–3.96 (m, 4H), 3.87 (s, 6H), 2.52–2.43 (m, 2H), 2.36 (t,  $J = 7.5$  Hz, 2H), 1.79–1.72 (m, 2H), 1.72–1.62 (m, 2H), 1.54–1.44 (m, 2H), 1.43–1.33 (m, 2H).  $^{13}\text{C}$  NMR (101 MHz,  $\text{CDCl}_3$ )  $\delta$  179.46, 168.95, 165.91, 153.55, 145.62, 143.97, 139.29, 130.39, 125.75, 120.85, 105.59, 73.35, 56.16, 41.67, 33.95, 29.85, 28.80, 25.47, 24.79, 24.63. HRMS (m/z): calculated for  $\text{C}_{23}\text{H}_{29}\text{NO}_7$   $[\text{M}+\text{Na}]^+$ : 454.1836, found 454.1858.

##### 4.1.1.2 *tert*-butyl (3-((5-chloro-4-iodopyridin-2-yl)amino)propyl)carbamate (**9**)

A mixture of 5-chloro-2-fluoro-4-iodopyridine **8** (1 g, 3.89 mmol), *tert*-butyl (3-



aminopropyl)carbamate (677 mg, 3.89 mmol), DIEA (1.02 mL, 5.84 mmol) and DMF (15mL) was stirred at 70°C for 12 hours. The mixture was dissolved in EA and washed with brine, dried over Na<sub>2</sub>SO<sub>4</sub>, filtered and concentrated. The crude product was purified by column chromatography (PE:EA = 2:1). The intermediate **9** (735 mg, 46%) was obtained as a white solid; m.p. 135-136°C; <sup>1</sup>H NMR (400 MHz, CDCl<sub>3</sub>) δ 8.01 (s, 1H), 6.94 (s, 1H), 5.05 (s, 1H), 4.84 (s, 1H), 3.34 (q, J = 6.3 Hz, 2H), 3.22 (q, J = 6.4 Hz, 2H), 1.78 – 1.69 (m, 2H), 1.46 (s, 9H). <sup>13</sup>C NMR (101 MHz, CDCl<sub>3</sub>) δ 156.97, 156.48, 145.67, 123.65, 118.07, 109.63, 79.44, 38.59, 37.46, 29.88, 28.41. HRMS (m/z): calculated for C<sub>13</sub>H<sub>19</sub>ClIN<sub>3</sub>O<sub>2</sub> [M+H]<sup>+</sup>: 412.0283, found 412.0302.

*4.1.1.3. 4-(2-((3-((tert-butoxycarbonyl)amino)propyl)amino)-5-chloropyridin-4-yl)-1H-pyrrole-2-carboxylic acid (14)*

A mixture of **9** (735 mg, 1.79 mmol), 1-(tert-butyl) 2-methyl 4-(4,4,5,5-tetramethyl-1,3,2-dioxaborolan-2-yl)-1H-pyrrole-1,2-dicarboxylate **12** (628 mg, 1.79 mmol), Pd(PPh)<sub>3</sub> (104 mg, 0.09 mmol), K<sub>2</sub>CO<sub>3</sub> (618 mg, 4.48 mmol), and dioxane: H<sub>2</sub>O (= 4:1, 10 mL: 2.5 mL) was stirred at 70°C for 8 hours under argon. The mixture was dissolved in EA and washed with brine, dried over Na<sub>2</sub>SO<sub>4</sub>, filtered and concentrated. The crude product is directly put into the next step without further purification. A mixture of the crude product **13**, 2N LiOH (5 mL) and THF (5 mL) was stirred at room temperature for 12h. Then, add 0.5N HCl to adjust the pH to 4-5. After stirring for 2h, white solids precipitate. Filter and wash with methanol for 3 times to obtain the intermediate **14** (247 mg, 35% over 2 steps). White solid; m.p. 137-138°C; <sup>1</sup>H NMR (400 MHz, DMSO-*d*<sub>6</sub>) δ 12.55 (s, 1H), 12.14 (s, 1H), 7.96 (s, 1H), 7.45 (s, 1H), 7.10 (s, 1H), 6.82 (s, 1H), 6.62 (s, 1H), 6.51 (s, 1H), 3.21 (q, J = 6.5 Hz, 2H), 2.98 (q, J = 6.5 Hz, 2H), 1.68–1.56 (m, 2H), 1.36 (s, 9H). <sup>13</sup>C NMR (101 MHz, DMSO-*d*<sub>6</sub>) δ 162.12, 158.47, 156.08, 147.82, 140.96, 124.04, 120.71, 115.65, 114.60, 107.02, 77.87, 39.03, 38.27, 29.83, 28.70. HRMS (m/z): calculated for C<sub>18</sub>H<sub>23</sub>ClN<sub>4</sub>O<sub>4</sub> [M+H]<sup>+</sup>: 395.1481, found 395.1504.

*4.1.1.4. (S)-4-(2-((3-aminopropyl)amino)-5-chloropyridin-4-yl)-N-(1-(3-chlorophenyl)-2-hydroxyethyl)-1H-pyrrole-2-carboxamide (A)*

---

A mixture of **14** (247 mg, 0.63 mmol), (S)-2-amino-2-(3-chlorophenyl)ethan-1-ol (107 mg, 0.63 mmol), HATU (289 mg, 0.76 mmol), DIEA (156  $\mu$ l, 0.95 mmol) and DMF was stirred at room temperature for 12 hours. The mixture was dissolved in EA and washed with brine, dried over Na<sub>2</sub>SO<sub>4</sub>, filtered and concentrated. The crude product was then added to TFA and stirred at room temperature for 2h and concentrated to remove TFA. The crude product was purified by column chromatography (DCM:MeOH = 10:1, 0.3% ammonia). The intermediate **A** (200 mg, 71%) was obtained. White solid; m.p. 123-124°C; <sup>1</sup>H NMR (400 MHz, CD<sub>3</sub>OD)  $\delta$  7.94 (s, 1H), 7.50 (s, 1H), 7.46 (s, 1H), 7.40 (s, 1H), 7.38–7.24 (m, 3H), 6.67 (s, 1H), 5.16 (t, J = 6.4 Hz, 1H), 3.87 (d, J = 6.4 Hz, 2H), 3.37 (s, 5H), 2.79 (t, J = 7.0 Hz, 2H), 1.85–1.75 (m, 2H). <sup>13</sup>C NMR (101 MHz, CD<sub>3</sub>OD)  $\delta$  161.65, 158.11, 146.68, 142.73, 142.33, 133.94, 129.58, 127.02, 126.80, 125.96, 125.17, 122.63, 120.59, 116.63, 110.71, 106.81, 64.38, 55.26, 38.58, 38.35, 31.47. HRMS (m/z): calculated for C<sub>21</sub>H<sub>23</sub>Cl<sub>2</sub>N<sub>5</sub>O<sub>2</sub> [M+H]<sup>+</sup>: 448.1302, found 448.1331.

*4.1.1.5. (R)-7-(2-((2-(4-aminobut-1-yn-1-yl)pyridin-4-yl)amino)-5-methylpyrimidin-4-yl)-3-methyl-2-((6-methylpyridin-2-yl)methyl)-3,4-dihydropyrrolo[1,2-a]pyrazin-1(2H)-one (B)*

Using a method similar to the one reported in literature[15]. A mixture of **19** (2.0 g, 5.25 mmol), tert-butyl (4-(4-aminopyridin-2-yl)but-3-yn-1-yl)carbamate (1.37g, 5.25 mmol), BrettPhos third-generation precatalyst (CAS: 1470372-59-8, 238 mg, 0.26 mmol), Cs<sub>2</sub>CO<sub>3</sub> (2.42 g, 10.5 mmol) and *t*-BuOH:dioxane (1: 1, 20mL) was stirred at 85°C for 6 hours under argon. The mixture was dissolved in EA and washed with brine, dried over Na<sub>2</sub>SO<sub>4</sub>, filtered and concentrated. The crude product was then added to TFA and stirred at room temperature for 2h and concentrated to remove TFA. The crude product was purified by column chromatography (DCM:MeOH = 8:1, 0.3% ammonia). The intermediate **B** (1.2 g, 45%) was obtained. Brown oil; <sup>1</sup>H NMR (400 MHz, CD<sub>3</sub>OD)  $\delta$  8.38 (s, 1H), 8.32 (s, 1H), 8.29 (d, J = 6.5 Hz, 1H), 7.83 (dd, J = 6.6, 2.3 Hz, 1H), 7.76 (t, J = 7.8 Hz, 1H), 7.69 (d, J = 1.7 Hz, 1H), 7.58 (d, J = 1.6 Hz, 1H), 7.32 (d, J = 7.8

---

Hz, 1H), 7.25 (d, J = 7.7 Hz, 1H), 5.33 (d, J = 15.8 Hz, 1H), 4.49–4.39 (m, 2H), 4.22 (dd, J = 13.1, 2.2 Hz, 1H), 4.11–4.01 (m, 1H), 3.30 (t, J = 6.6 Hz, 2H), 3.00 (t, J = 6.6 Hz, 2H), 2.58 (s, 3H), 2.42 (s, 3H), 1.29 (d, J = 6.6 Hz, 3H). <sup>13</sup>C NMR (101 MHz, CD<sub>3</sub>OD) δ 159.45, 159.21, 158.97, 157.87, 157.02, 156.28, 151.69, 144.94, 138.22, 137.98, 126.85, 124.00, 123.53, 122.40, 120.02, 119.13, 115.43, 113.68, 111.65, 78.48, 52.43, 48.88, 48.71, 37.78, 22.41, 17.52, 16.55, 15.89. HRMS (m/z): calculated for C<sub>29</sub>H<sub>30</sub>N<sub>8</sub>O [M+H]<sup>+</sup>: 507.2615, found 507.2612.

4.1.1.6. (R)-3-methyl-7-(5-methyl-2-((2-(4-(piperazin-1-yl)but-1-yn-1-yl)pyridin-4-yl)amino)pyrimidin-4-yl)-2-((6-methylpyridin-2-yl)methyl)-3,4-dihydropyrrolo[1,2-a]pyrazin-1(2H)-one (**B-P**)

This compound was prepared using a procedure similar to that used for **B**. Brown oil; <sup>1</sup>H NMR (400 MHz, CD<sub>3</sub>OD) δ 8.33 (s, 1H), 8.30 – 8.21 (m, 2H), 8.07 (d, J = 6.9 Hz, 1H), 7.80 (t, J = 7.8 Hz, 1H), 7.69 (d, J = 1.7 Hz, 1H), 7.51 (d, J = 1.7 Hz, 1H), 7.34 (d, J = 7.8 Hz, 1H), 7.28 (d, J = 7.7 Hz, 1H), 5.30 (d, J = 15.9 Hz, 1H), 4.49–4.40 (m, 2H), 4.27–4.18 (m, 1H), 4.12–4.01 (m, 1H), 3.28–3.20 (m, 4H), 2.87–2.77 (m, 8H), 2.58 (s, 3H), 2.41 (s, 3H), 1.28 (d, J = 6.7 Hz, 3H). <sup>13</sup>C NMR (101 MHz, CD<sub>3</sub>OD) δ 162.15, 161.81, 161.47, 161.13, 159.41, 159.16, 157.56, 156.52, 156.00, 153.87, 141.67, 138.84, 135.28, 126.97, 124.07, 122.67, 120.99, 119.33, 118.28, 115.36, 113.63, 111.26, 97.99, 73.85, 55.10, 52.50, 49.01, 43.33, 22.09, 17.03, 16.58, 15.94. HRMS (m/z): calculated for C<sub>33</sub>H<sub>37</sub>N<sub>9</sub>O [M+H]<sup>+</sup>: 576.3194, found 576.3199.

4.1.1.7. (R)-3-methyl-7-(5-methyl-2-((2-(4-(methylamino)but-1-yn-1-yl)pyridin-4-yl)amino)pyrimidin-4-yl)-2-((6-methylpyridin-2-yl)methyl)-3,4-dihydropyrrolo[1,2-a]pyrazin-1(2H)-one (**B-J**)

This compound was prepared using a procedure similar to that used for **B**. Brown oil; <sup>1</sup>H NMR (400 MHz, CD<sub>3</sub>OD) δ 8.26–8.19 (m, 2H), 8.16 (s, 1H), 7.73 (t, J = 7.8 Hz, 1H), 7.66 (d, J = 8.5 Hz, 2H), 7.54 (s, 1H), 7.28 (d, J = 7.8 Hz, 1H), 7.21 (d, J = 7.7 Hz, 1H), 5.30 (d, J = 15.8 Hz, 1H), 4.47–4.37 (m, 2H), 4.22 (d, J = 13.0 Hz, 1H), 4.10–4.00

---

(m, 1H), 3.36 (t, J = 6.5 Hz, 2H), 3.01 (t, J = 6.5 Hz, 2H), 2.80 (s, 3H), 2.55 (s, 3H), 2.36 (s, 3H), 1.29 (d, J = 6.6 Hz, 3H). <sup>13</sup>C NMR (101 MHz, CD<sub>3</sub>OD) δ 159.31, 159.23, 158.73, 158.01, 157.43, 156.51, 149.32, 148.23, 141.12, 137.84, 126.73, 123.90, 123.74, 122.17, 118.89, 118.85, 115.27, 113.69, 111.69, 84.87, 81.79, 52.44, 48.91, 47.25, 32.43, 22.65, 16.58, 16.38, 15.96. HRMS (m/z): calculated for C<sub>30</sub>H<sub>32</sub>N<sub>8</sub>O [M+H]<sup>+</sup>: 521.2772, found 521.2782.

*4.1.1.8. (R)-7-(2-((2-((3-aminopropyl)amino)pyridin-4-yl)amino)-5-methylpyrimidin-4-yl)-3-methyl-2-((6-methylpyridin-2-yl)methyl)-3,4-dihydropyrrolo[1,2-a]pyrazin-1(2H)-one (B-N)*

This compound was prepared using a procedure similar to that used for **B**. White oil; <sup>1</sup>H NMR (400 MHz, CD<sub>3</sub>OD) δ 8.26 (s, 1H), 8.21 (t, J = 7.9 Hz, 1H), 7.76 (s, 1H), 7.72–7.66 (m, 2H), 7.63 (d, J = 7.9 Hz, 1H), 7.58 (d, J = 7.2 Hz, 1H), 7.53 (d, J = 1.6 Hz, 1H), 6.86 (d, J = 8.0 Hz, 1H), 5.42 (d, J = 16.4 Hz, 1H), 4.65 (d, J = 16.4 Hz, 1H), 4.57–4.48 (m, 1H), 4.27 (d, J = 13.2 Hz, 1H), 4.22–4.11 (m, 1H), 3.43 (t, J = 6.6 Hz, 2H), 3.13 (t, J = 7.6 Hz, 2H), 2.76 (s, 3H), 2.37 (s, 3H), 2.16–2.06 (m, 2H), 1.34 (d, J = 6.6 Hz, 3H). <sup>13</sup>C NMR (101 MHz, CD<sub>3</sub>OD) δ 161.93, 161.58, 159.56, 158.77, 157.04, 155.58, 154.07, 153.50, 152.85, 143.37, 134.94, 127.11, 124.84, 123.56, 121.39, 120.09, 118.23, 115.33, 114.04, 104.64, 92.50, 53.16, 39.10, 36.96, 26.04, 19.82, 16.58, 16.00. HRMS (m/z): calculated for C<sub>28</sub>H<sub>33</sub>N<sub>9</sub>O [M+H]<sup>+</sup>: 512.2881, found 512.2897.

*4.1.1.9. (R)-7-(2-((3-(4-aminobut-1-yn-1-yl)phenyl)amino)-5-methylpyrimidin-4-yl)-3-methyl-2-((6-methylpyridin-2-yl)methyl)-3,4-dihydropyrrolo[1,2-a]pyrazin-1(2H)-one (B-B)*

This compound was prepared using a procedure similar to that used for **B**. White oil; <sup>1</sup>H NMR (400 MHz, CD<sub>3</sub>OD) δ 8.20 (s, 1H), 8.15 (s, 1H), 7.71 (t, J = 7.8 Hz, 1H), 7.60 (d, J = 11.5 Hz, 2H), 7.50 (d, J = 8.3 Hz, 1H), 7.29–7.17 (m, 3H), 7.03 (d, J = 7.6 Hz, 1H), 5.30 (d, J = 15.7 Hz, 1H), 4.43–4.30 (m, 2H), 4.15 (d, J = 13.0 Hz, 1H), 3.99 (s, 1H), 3.23 (t, J = 6.4 Hz, 2H), 2.90 (t, J = 6.9 Hz, 2H), 2.55 (s, 3H), 2.34 (s, 3H), 1.25

---

(d, J = 6.6 Hz, 3H).  $^{13}\text{C}$  NMR (101 MHz,  $\text{CD}_3\text{OD}$ )  $\delta$  159.28, 159.12, 158.77, 158.27, 158.01, 156.51, 140.88, 137.80, 128.27, 126.54, 124.17, 124.05, 123.72, 122.96, 122.19, 121.48, 118.89, 118.41, 116.92, 113.85, 83.41, 83.04, 52.35, 48.84, 38.42, 22.64, 17.80, 16.44, 15.88. HRMS (m/z): calculated for  $\text{C}_{30}\text{H}_{31}\text{N}_7\text{O}$   $[\text{M}+\text{H}]^+$ : 506.2663, found 506.2691.

*4.1.1.10. (R)-7-(2-((1-(4-aminobutyl)-1H-pyrazol-3-yl)amino)-5-methylpyrimidin-4-yl)-3-methyl-2-((6-methylpyridin-2-yl)methyl)-3,4-dihydropyrrolo[1,2-a]pyrazin-1(2H)-one (B-BZ)*

This compound was prepared using a procedure similar to that used for **B**. White solid; m.p. 92-93°C;  $^1\text{H}$  NMR (400 MHz,  $\text{CD}_3\text{OD}$ )  $\delta$  8.18 (s, 1H), 7.66 (t, J = 7.7 Hz, 1H), 7.56 (d, J = 18.3 Hz, 2H), 7.50 (d, J = 2.3 Hz, 1H), 7.22 (d, J = 7.8 Hz, 1H), 7.16 (d, J = 7.7 Hz, 1H), 6.77 (d, J = 2.3 Hz, 1H), 5.26 (d, J = 15.8 Hz, 1H), 4.41–4.31 (m, 2H), 4.14 (d, J = 13.0 Hz, 1H), 4.07 (t, J = 6.9 Hz, 2H), 4.02–3.93 (m, 1H), 2.64 (t, J = 7.3 Hz, 2H), 2.52 (s, 3H), 2.34 (s, 3H), 1.86 (p, J = 7.0 Hz, 2H), 1.46 (p, J = 7.6 Hz, 2H), 1.23 (d, J = 6.6 Hz, 3H).  $^{13}\text{C}$  NMR (101 MHz,  $\text{CD}_3\text{OD}$ )  $\delta$  159.25, 159.22, 159.18, 157.99, 157.91, 156.56, 148.96, 137.75, 130.22, 126.49, 124.14, 123.76, 122.11, 118.82, 116.57, 113.73, 96.27, 52.35, 51.01, 48.85, 40.54, 29.08, 27.33, 22.66, 16.36, 15.92. HRMS (m/z): calculated for  $\text{C}_{27}\text{H}_{33}\text{N}_9\text{O}$   $[\text{M}+\text{H}]^+$ : 500.2881, found 500.2902.

*4.1.1.11. (S)-4-(2-((2-(4-aminobut-1-yn-1-yl)pyridin-4-yl)amino)pyrimidin-4-yl)-1-(1-(4-chloro-3-fluorophenyl)-2-hydroxyethyl)pyridin-2(1H)-one (C)*

Using a method similar to the one reported in literature[32]. White solid; m.p. 138-139°C;  $^1\text{H}$  NMR (400 MHz,  $\text{CD}_3\text{OD}$ )  $\delta$  8.68 (s, 1H), 8.25 (s, 1H), 7.96 (s, 1H), 7.93–7.88 (m, 1H), 7.78 (s, 1H), 7.55–7.43 (m, 2H), 7.39–7.30 (m, 2H), 7.21 (d, J = 8.6 Hz, 1H), 7.09 (s, 1H), 6.15 (t, J = 6.2 Hz, 1H), 4.38–4.28 (m, 1H), 4.28–4.18 (m, 1H), 2.91 (t, J = 6.3 Hz, 2H), 2.63 (t, J = 6.3 Hz, 2H). HRMS (m/z): calculated for  $\text{C}_{26}\text{H}_{22}\text{ClFN}_6\text{O}_2$   $[\text{M}+\text{H}]^+$ : 505.1550, found 505.1547.



---

#### 4.1.2. General Procedure for A1 ~ A4, C1 ~ C4, B1-4 ~ B1-12, B1-3P ~ B1-5P, B1-10N (B, BZ), B2-4 ~ B2-14 and B2-12N, B3, B4.

A mixture of ligands of ERK1/2 (1 eq), complex of E3 ligand and linker (1 eq), HATU (1.2 eq), DIEA (1.5 eq) and DMF was stirred at room temperature for 12 hours. The mixture was dissolved in EA and washed with brine, dried over Na<sub>2</sub>SO<sub>4</sub>, filtered and concentrated. The crude product was purified by column chromatography (DCM:MeOH = 10:1, 0.3% ammonia). The corresponding Amide compound (31–85%) was obtained.

##### 4.1.2.1. 4-(5-chloro-2-((3-(8-((2-(2,6-dioxopiperidin-3-yl)-1,3-dioxoisindolin-4-yl)amino)octanamido)propyl)amino)pyridin-4-yl)-N-((S)-1-(3-chlorophenyl)-2-hydroxyethyl)-1H-pyrrole-2-carboxamide (A1)

Yellow solid; m.p. 101-102°C; <sup>1</sup>H NMR (400 MHz, DMSO-*d*<sub>6</sub>) δ 11.86 (s, 1H), 11.09 (s, 1H), 8.45 (d, J = 8.2 Hz, 1H), 7.98 (s, 1H), 7.78 (t, J = 5.1 Hz, 1H), 7.57 (t, J = 7.8 Hz, 1H), 7.46 (s, 1H), 7.43–7.34 (m, 4H), 7.33–7.28 (m, 1H), 7.06 (d, J = 8.6 Hz, 1H), 7.01 (d, J = 7.0 Hz, 1H), 6.62 (s, 1H), 6.56 (t, J = 5.8 Hz, 1H), 6.50 (t, J = 5.9 Hz, 1H), 5.12–4.96 (m, 3H), 3.73–3.65 (m, 2H), 3.33–3.16 (m, 5H), 3.11 (q, J = 6.5 Hz, 2H), 2.95–2.81 (m, 1H), 2.64–2.55 (m, 1H), 2.10–1.97 (m, 3H), 1.69–1.60 (m, 2H), 1.59–1.44 (m, 4H), 1.36–1.20 (m, 6H). <sup>13</sup>C NMR (101 MHz, DMSO-*d*<sub>6</sub>) δ 173.25, 172.58, 170.54, 169.41, 167.75, 160.45, 158.47, 147.84, 146.88, 144.58, 141.45, 136.72, 133.28, 132.64, 130.42, 127.28, 127.24, 127.07, 126.39, 122.49, 120.15, 117.59, 115.73, 110.83, 110.72, 109.47, 106.92, 64.67, 55.08, 49.01, 42.29, 39.13, 36.80, 35.90, 31.45, 29.55, 29.13, 29.09, 28.97, 26.69, 25.75, 22.62. HRMS (m/z): calculated for C<sub>42</sub>H<sub>46</sub>Cl<sub>2</sub>N<sub>8</sub>O<sub>7</sub> [M+H]<sup>+</sup>: 845.2939, found 845.2990. Purity: 97.2%.

##### 4.1.2.2. N1-(3-((5-chloro-4-(5-(((S)-1-(3-chlorophenyl)-2-hydroxyethyl)carbamoyl)-1H-pyrrol-3-yl)pyridin-2-yl)amino)propyl)-N10-((S)-1-((2S,4R)-4-hydroxy-2-(((S)-1-(4-(4-methylthiazol-5-yl)phenyl)ethyl)carbamoyl)pyrrolidin-1-yl)-3,3-dimethyl-1-oxobutan-2-yl)decanediamide (A2)

White solid; m.p. 140-141°C; <sup>1</sup>H NMR (400 MHz, CD<sub>3</sub>OD) δ 8.85 (s, 1H), 7.93 (s, 1H), 7.52 (s, 1H), 7.45 (s, 1H), 7.43–7.37 (m, 5H), 7.36–7.21 (m, 3H), 6.66 (s, 1H), 5.18 (t, J = 6.3 Hz, 1H), 5.00 (q, J = 6.9 Hz, 1H), 4.68–4.59 (m, 2H), 4.44 (s, 1H), 3.95–3.83 (m, 3H), 3.76 (dd, J = 11.0, 3.9 Hz, 1H), 3.33–3.25 (m, 4H), 2.45 (s, 3H), 2.29–2.12 (m, 5H), 2.05–1.92 (m, 1H), 1.86–1.74 (m, 2H), 1.62–1.50 (m, 4H), 1.47 (d, J = 7.0 Hz, 3H), 1.30–1.20 (m, 8H), 1.05 (s, 9H). <sup>13</sup>C NMR (101 MHz, CD<sub>3</sub>OD) δ 174.97, 174.67, 171.88, 171.01, 161.61, 157.95, 151.40, 147.62, 146.81, 144.19, 142.79, 142.25, 133.93, 131.93, 130.08, 129.61, 129.06, 127.05, 126.85, 126.19, 125.94, 125.24, 122.82, 120.55, 116.63, 110.73, 106.79, 69.57, 64.46, 59.25, 57.62, 56.65, 55.32, 48.79, 38.86, 37.40, 36.64, 35.86, 35.20, 35.10, 28.86, 28.83, 28.81, 28.76, 25.76, 25.69, 25.57, 21.09, 14.50. HRMS (m/z): calculated for C<sub>54</sub>H<sub>69</sub>Cl<sub>2</sub>N<sub>9</sub>O<sub>7</sub>S [M+H]<sup>+</sup>: 1058.4490, found 1058.4498. Purity: 99.3%.

4.1.2.3. *(S,E)-4-(5-chloro-2-((3-(7-(2,6-dimethoxy-4-(3-oxo-3-(6-oxo-3,6-dihydropyridin-1(2H)-yl)prop-1-en-1-yl)phenoxy)heptanamido)propyl)amino)pyridin-4-yl)-N-(1-(3-chlorophenyl)-2-hydroxyethyl)-1H-pyrrole-2-carboxamide (A3)*

White solid; m.p. 103-104°C; <sup>1</sup>H NMR (400 MHz, CDCl<sub>3</sub>) δ 10.94 (s, 1H), 8.11 (s, 1H), 7.90 (s, 1H), 7.64 (d, J = 15.5 Hz, 1H), 7.42–7.34 (m, 2H), 7.28–7.18 (m, 2H), 7.13 (s, 2H), 7.05 (s, 1H), 6.92 (dt, 1H), 6.84 (s, 1H), 6.74 (s, 2H), 6.25 (s, 1H), 6.01 (d, J = 9.7 Hz, 1H), 5.29 (s, 1H), 5.22 (s, 1H), 4.73 (s, 1H), 4.06–3.87 (m, 6H), 3.79 (s, 6H), 3.36–3.17 (m, 4H), 2.45 (d, J = 5.7 Hz, 2H), 2.19 (t, J = 7.7 Hz, 2H), 1.72–1.55 (m, 6H), 1.48–1.28 (m, 4H). <sup>13</sup>C NMR (101 MHz, CDCl<sub>3</sub>) δ 174.51, 168.99, 165.94, 161.59, 157.46, 153.47, 147.47, 145.77, 143.82, 142.05, 141.58, 139.18, 134.32, 130.39, 129.84, 127.60, 126.88, 125.83, 125.65, 125.20, 123.27, 120.95, 120.68, 117.06, 110.47, 106.63, 105.59, 73.38, 65.29, 56.12, 55.87, 41.71, 38.48, 36.66, 29.85, 29.30, 28.96, 25.80, 25.48, 24.77. HRMS (m/z): calculated for C<sub>44</sub>H<sub>50</sub>Cl<sub>2</sub>N<sub>6</sub>O<sub>8</sub> [M+H]<sup>+</sup>: 861.3140, found 861.3131. Purity: 98.0%.

4.1.2.4. *(S)-N1-(adamantan-1-yl)-N10-(3-((5-chloro-4-(5-((1-(3-chlorophenyl)-2-*

---

*hydroxyethyl)carbamoyl)-1H-pyrrol-3-yl)pyridin-2-yl)amino)propyl)decanediamide*  
(A4)

White solid; m.p. 124-125°C; <sup>1</sup>H NMR (400 MHz, CD<sub>3</sub>OD) δ 7.92 (s, 1H), 7.49 (d, J = 1.5 Hz, 1H), 7.46 (s, 1H), 7.40 (d, J = 1.6 Hz, 1H), 7.37–7.28 (m, 2H), 7.27–7.23 (m, 1H), 6.65 (s, 1H), 5.18 (t, J = 6.4 Hz, 1H), 3.88 (d, J = 6.4 Hz, 2H), 3.37 (s, 2H), 3.33–3.25 (m, 4H), 2.18 (t, J = 7.5 Hz, 2H), 2.07 (t, J = 7.5 Hz, 2H), 1.99 (s, 9H), 1.85–1.73 (m, 2H), 1.67 (s, 6H), 1.63–1.47 (m, 4H), 1.27 (s, 8H). <sup>13</sup>C NMR (101 MHz, CD<sub>3</sub>OD) δ 174.98, 174.13, 161.63, 157.92, 146.72, 142.72, 142.29, 133.96, 129.60, 127.06, 126.85, 125.95, 125.22, 122.72, 120.59, 116.65, 110.76, 106.84, 64.43, 55.29, 51.28, 40.97, 38.81, 36.61, 36.12, 35.84, 29.49, 28.90, 28.85, 28.80, 28.75, 25.78, 25.66. HRMS (m/z): calculated for C<sub>41</sub>H<sub>54</sub>Cl<sub>2</sub>N<sub>6</sub>O<sub>4</sub> [M+H]<sup>+</sup>: 764.3656, found 765.3654. Purity: 99.2%.

4.1.2.5. *N-(4-(4-((4-(1-((S)-1-(4-chloro-3-fluorophenyl)-2-hydroxyethyl)-2-oxo-1,2-dihydropyridin-4-yl)pyrimidin-2-yl)amino)pyridin-2-yl)but-3-yn-1-yl)-8-((2-(2,6-dioxopiperidin-3-yl)-1,3-dioxoisindolin-4-yl)amino)octanamide* (CI)

Yellow solid; m.p. 140-141°C; <sup>1</sup>H NMR (400 MHz, DMSO-*d*<sub>6</sub>) δ 11.10 (s, 1H), 10.38 (s, 1H), 8.73 (d, J = 5.2 Hz, 1H), 8.33 (d, J = 5.7 Hz, 1H), 8.06 (t, J = 5.7 Hz, 1H), 8.02–7.95 (m, 2H), 7.76–7.69 (m, 1H), 7.64–7.40 (m, 4H), 7.25 (d, J = 2.0 Hz, 1H), 7.19 (d, J = 8.4 Hz, 1H), 7.03–6.93 (m, 3H), 6.43 (t, J = 5.9 Hz, 1H), 6.02 (t, J = 6.4 Hz, 1H), 5.37 (s, 1H), 5.05 (dd, J = 12.9, 5.4 Hz, 1H), 4.26–4.15 (m, 1H), 4.13–4.05 (m, 1H), 3.29 (q, J = 6.6 Hz, 2H), 3.19 (q, J = 6.7 Hz, 2H), 2.96–2.81 (m, 1H), 2.65–2.51 (m, 4H), 2.10–2.00 (m, 3H), 1.48 (t, J = 7.0 Hz, 4H), 1.22 (s, 6H). <sup>13</sup>C NMR (101 MHz, DMSO-*d*<sub>6</sub>) δ 173.24, 172.87, 170.54, 169.39, 167.73, 162.21, 161.55, 160.45, 159.98, 158.82, 156.37, 150.37, 147.77, 146.98, 146.81, 143.38, 140.08, 140.01, 137.59, 136.66, 132.60, 131.20, 125.56, 125.53, 119.39, 119.22, 118.06, 117.48, 116.74, 116.52, 116.07, 112.30, 111.01, 110.80, 109.46, 103.41, 87.98, 82.00, 61.24, 59.35, 49.02, 42.27, 38.02, 35.85, 31.45, 29.12, 29.05, 29.00, 26.65, 25.73, 22.62, 19.93. HRMS (m/z): calculated for C<sub>47</sub>H<sub>45</sub>ClFN<sub>9</sub>O<sub>7</sub> [M+H]<sup>+</sup>: 902.3187, found 902.3187. Purity:

---

100.0%.

4.1.2.6. *N1-(4-(4-((4-(1-((S)-1-(4-chloro-3-fluorophenyl)-2-hydroxyethyl)-2-oxo-1,2-dihydropyridin-4-yl)pyrimidin-2-yl)amino)pyridin-2-yl)but-3-yn-1-yl)-N10-((S)-1-((2S,4R)-4-hydroxy-2-(((S)-1-(4-(4-methylthiazol-5-yl)phenyl)ethyl)carbamoyl)pyrrolidin-1-yl)-3,3-dimethyl-1-oxobutan-2-yl)decanediamide (C2)*

White solid; m.p. 143-144°C; <sup>1</sup>H NMR (400 MHz, CD<sub>3</sub>OD) δ 8.83 (s, 1H), 8.60 (d, J = 5.1 Hz, 1H), 8.21 (d, J = 5.9 Hz, 1H), 8.00 (d, J = 2.1 Hz, 1H), 7.90 (d, J = 7.3 Hz, 1H), 7.71–7.62 (m, 1H), 7.45 (t, J = 8.0 Hz, 1H), 7.41–7.30 (m, 7H), 7.21–7.14 (m, 1H), 7.04–6.99 (m, 1H), 6.19–6.11 (m, 1H), 5.01 (q, J = 6.9 Hz, 1H), 4.66–4.59 (m, 2H), 4.45 (s, 1H), 4.38–4.30 (m, 1H), 4.27–4.19 (m, 1H), 3.91 (d, J = 11.0 Hz, 1H), 3.80–3.71 (m, 1H), 3.43 (t, J = 6.5 Hz, 2H), 2.67 (t, J = 6.5 Hz, 2H), 2.44 (s, 3H), 2.27–2.09 (m, J = 7.5 Hz, 5H), 2.04–1.93 (m, 1H), 1.61–1.43 (m, 7H), 1.32–1.14 (m, 8H), 1.03 (s, 9H). <sup>13</sup>C NMR (101 MHz, CD<sub>3</sub>OD) δ 175.04, 174.58, 174.50, 171.79, 170.94, 163.39, 161.08, 159.70, 159.62, 159.17, 156.70, 151.38, 149.04, 148.14, 147.76, 147.60, 144.16, 142.94, 138.70, 138.64, 136.64, 131.89, 130.73, 130.06, 129.01, 126.22, 124.58, 124.54, 120.22, 120.04, 117.47, 116.17, 115.73, 111.89, 110.28, 104.50, 87.82, 80.76, 69.59, 61.20, 59.71, 59.23, 57.69, 57.60, 56.66, 37.85, 37.44, 35.78, 35.31, 35.27, 35.10, 28.97, 28.89, 28.87, 28.85, 25.76, 25.57, 21.07, 19.34, 14.56. HRMS (m/z): calculated for C<sub>59</sub>H<sub>68</sub>ClFN<sub>10</sub>O<sub>7</sub>S [M+H]<sup>+</sup>: 1115.4738, found 1115.4748. Purity: 99.3%.

4.1.2.7. *(S,E)-N-(4-(4-((4-(1-(1-(4-chloro-3-fluorophenyl)-2-hydroxyethyl)-2-oxo-1,2-dihydropyridin-4-yl)pyrimidin-2-yl)amino)pyridin-2-yl)but-3-yn-1-yl)-7-(2,6-dimethoxy-4-(3-oxo-3-(6-oxo-3,6-dihydropyridin-1(2H)-yl)prop-1-en-1-yl)phenoxy)heptanamide (C3)*

White solid; m.p. 114-115°C; <sup>1</sup>H NMR (400 MHz, CDCl<sub>3</sub>) δ 8.64 (s, 1H), 8.42 (d, J = 5.1 Hz, 1H), 8.09 (d, J = 5.7 Hz, 1H), 7.70 (s, 1H), 7.61 (d, J = 15.6 Hz, 1H), 7.49 – 7.32 (m, 5H), 7.28 (d, J = 10.1 Hz, 1H), 7.16 (d, J = 8.5 Hz, 1H), 7.11–7.02 (m, 2H), 6.98 – 6.89 (m, 1H), 6.72 (s, 2H), 6.56 (d, J = 7.2 Hz, 1H), 6.18 (t, J = 4.5 Hz, 1H), 6.03

---

(d, J = 9.7 Hz, 1H), 4.39 (s, 2H), 4.01 (t, J = 6.5 Hz, 2H), 3.91 (t, J = 6.6 Hz, 2H), 3.78 (s, 6H), 3.61–3.51 (m, 1H), 3.49–3.37 (m, 1H), 2.68–2.60 (m, 2H), 2.46 (q, J = 4.1 Hz, 2H), 2.25 (t, J = 7.5 Hz, 2H), 1.73–1.60 (m, 4H), 1.48–1.28 (m, 4H). <sup>13</sup>C NMR (101 MHz, CDCl<sub>3</sub>) δ 174.03, 168.88, 165.90, 162.71, 161.15, 159.36, 159.31, 159.16, 156.88, 153.46, 149.73, 147.16, 146.49, 145.72, 143.72, 143.16, 139.24, 138.19, 138.13, 136.77, 131.03, 130.35, 125.68, 124.92, 120.95, 120.78, 117.90, 116.91, 116.70, 115.80, 111.71, 110.02, 105.57, 103.59, 88.45, 81.48, 73.39, 61.45, 59.30, 56.10, 41.68, 38.15, 36.40, 29.92, 29.00, 25.81, 25.53, 24.78, 20.39. HRMS (m/z): calculated for C<sub>49</sub>H<sub>49</sub>ClFN<sub>7</sub>O<sub>8</sub> [M+H]<sup>+</sup>: 918.3388, found 918.3387. Purity: 99.7%.

*4.1.2.8. (S)-N1-(adamantan-1-yl)-N10-(4-(4-((4-(1-(1-(4-chloro-3-fluorophenyl)-2-hydroxyethyl)-2-oxo-1,2-dihydropyridin-4-yl)pyrimidin-2-yl)amino)pyridin-2-yl)but-3-yn-1-yl)decanediamide (C4)*

White solid; m.p. 134–135°C; <sup>1</sup>H NMR (400 MHz, CD<sub>3</sub>OD) δ 8.61 (d, J = 5.1 Hz, 1H), 8.20 (d, J = 5.9 Hz, 1H), 7.96 (d, J = 2.0 Hz, 1H), 7.89 (d, J = 7.3 Hz, 1H), 7.72–7.65 (m, 1H), 7.46 (t, J = 8.0 Hz, 1H), 7.39 (d, J = 5.1 Hz, 1H), 7.36–7.29 (m, 2H), 7.20 (s, 1H), 7.06–6.99 (m, 1H), 6.19–6.10 (m, 1H), 4.39–4.29 (m, 1H), 4.28–4.19 (m, 1H), 3.43 (t, J = 6.6 Hz, 2H), 2.66 (t, J = 6.5 Hz, 2H), 2.19 (t, J = 7.4 Hz, 2H), 2.06–1.94 (m, 11H), 1.65 (d, J = 2.8 Hz, 6H), 1.62–1.53 (m, 2H), 1.52–1.41 (m, 2H), 1.32–1.16 (m, 8H). <sup>13</sup>C NMR (101 MHz, CD<sub>3</sub>OD) δ 175.07, 174.12, 174.04, 163.40, 161.08, 159.73, 159.57, 159.18, 156.71, 148.98, 148.16, 147.80, 142.91, 138.69, 138.62, 136.57, 130.72, 124.54, 124.51, 120.23, 120.06, 117.42, 116.15, 115.93, 115.69, 111.80, 110.22, 104.51, 87.73, 80.69, 61.18, 59.69, 51.33, 47.64, 47.42, 47.21, 47.00, 40.98, 37.85, 36.63, 36.57, 36.11, 35.74, 29.48, 28.95, 28.88, 28.83, 28.76, 25.75, 25.70, 19.34. HRMS (m/z): calculated for C<sub>46</sub>H<sub>53</sub>ClFN<sub>7</sub>O<sub>4</sub> [M+H]<sup>+</sup>: 822.3904, found 822.3913. Purity: 99.7%.

*4.1.2.9. 4-((2-(2,6-dioxopiperidin-3-yl)-1,3-dioxoisindolin-4-yl)amino)-N-(4-(4-((5-methyl-4-((R)-3-methyl-2-((6-methylpyridin-2-yl)methyl)-1-oxo-1,2,3,4-*



---

*tetrahydropyrrolo[1,2-a]pyrazin-7-yl)pyrimidin-2-yl)amino)pyridin-2-yl)but-3-yn-1-yl)butanamide (B1-4)*

Yellow solid; m.p. 156-157°C; <sup>1</sup>H NMR (400 MHz, DMSO-*d*<sub>6</sub>) δ 11.11 (s, 1H), 10.02 (s, 1H), 8.37 (s, 1H), 8.27 (d, J = 5.8 Hz, 1H), 8.14 (t, J = 5.8 Hz, 1H), 8.04 (s, 1H), 7.75 (s, 1H), 7.72–7.62 (m, 2H), 7.55–7.47 (m, 1H), 7.39 (s, 1H), 7.21–7.11 (m, 2H), 7.04 (d, J = 8.7 Hz, 1H), 6.98 (d, J = 7.0 Hz, 1H), 6.57 (t, J = 6.1 Hz, 1H), 5.17 (d, J = 16.0 Hz, 1H), 5.09–5.00 (m, 1H), 4.46–4.37 (m, 1H), 4.31 (d, J = 16.0 Hz, 1H), 4.24 (d, J = 10.8 Hz, 1H), 4.03–3.96 (m, 1H), 3.32–3.23 (m, 4H), 2.95–2.81 (m, 1H), 2.63 (t, J = 7.0 Hz, 4H), 2.46 (s, 3H), 2.37 (s, 3H), 2.19 (t, J = 7.1 Hz, 2H), 2.07–1.98 (m, 1H), 1.86–1.75 (m, 2H), 1.19 (d, J = 6.6 Hz, 3H). <sup>13</sup>C NMR (101 MHz, DMSO-*d*<sub>6</sub>) δ 173.27, 172.29, 170.56, 169.26, 167.73, 160.01, 159.02, 158.06, 158.01, 157.86, 157.37, 149.77, 148.64, 146.72, 142.72, 137.66, 136.59, 132.60, 126.87, 124.93, 123.12, 122.05, 118.75, 118.72, 117.50, 115.53, 112.93, 111.79, 110.80, 109.50, 88.26, 81.72, 52.10, 49.38, 49.21, 48.99, 41.95, 38.09, 32.94, 31.45, 25.19, 24.47, 22.64, 19.97, 17.62, 17.48. HRMS (m/z): calculated for C<sub>46</sub>H<sub>45</sub>N<sub>11</sub>O<sub>6</sub> [M+H]<sup>+</sup>: 848.3627, found 848.3628. Purity: 95.8%.

*4.1.2.10. 6-((2-(2,6-dioxopiperidin-3-yl)-1,3-dioxoisindolin-4-yl)amino)-N-(4-(4-((5-methyl-4-((R)-3-methyl-2-((6-methylpyridin-2-yl)methyl)-1-oxo-1,2,3,4-tetrahydropyrrolo[1,2-a]pyrazin-7-yl)pyrimidin-2-yl)amino)pyridin-2-yl)but-3-yn-1-yl)hexanamide (B1-6)*

Yellow solid; m.p. 149-150°C; <sup>1</sup>H NMR (400 MHz, DMSO-*d*<sub>6</sub>) δ 11.12 (s, 1H), 9.94 (s, 1H), 8.35 (s, 1H), 8.27 (d, J = 5.7 Hz, 1H), 8.10–8.02 (m, 2H), 7.74 (s, 1H), 7.71–7.60 (m, 2H), 7.52 (t, J = 7.8 Hz, 1H), 7.40 (s, 1H), 7.21–7.10 (m, 2H), 7.01–6.93 (m, 2H), 6.43 (t, J = 5.8 Hz, 1H), 5.17 (d, J = 16.0 Hz, 1H), 5.10–5.00 (m, 1H), 4.46–4.36 (m, 1H), 4.36–4.19 (m, 2H), 4.05–3.93 (m, 1H), 3.29 (q, J = 6.7 Hz, 2H), 3.19 (q, J = 6.7 Hz, 2H), 2.95–2.81 (m, 1H), 2.66–2.51 (m, 4H), 2.46 (s, 3H), 2.36 (s, 3H), 2.13–1.99 (m, 3H), 1.60–1.45 (m, 4H), 1.36–1.25 (m, 2H), 1.19 (d, J = 6.6 Hz, 3H). <sup>13</sup>C NMR (101 MHz, DMSO-*d*<sub>6</sub>) δ 173.27, 172.68, 170.57, 169.37, 167.74, 160.02, 158.96,

---

158.17, 158.03, 157.88, 157.38, 150.37, 148.20, 146.77, 143.48, 137.63, 136.62, 132.57, 126.84, 124.90, 123.18, 122.04, 118.74, 118.49, 117.46, 115.53, 112.95, 111.79, 110.78, 109.42, 87.39, 82.30, 52.11, 49.38, 49.22, 49.01, 42.17, 38.09, 35.77, 31.46, 28.93, 26.37, 25.52, 24.48, 22.64, 19.93, 17.62, 17.47. HRMS (m/z): calculated for C<sub>48</sub>H<sub>49</sub>N<sub>11</sub>O<sub>6</sub> [M+H]<sup>+</sup>: 876.3940, found 876.3935. Purity: 95.3%.

*4.1.2.11. 8-((2-(2,6-dioxopiperidin-3-yl)-1,3-dioxoisindolin-4-yl)amino)-N-(4-(4-((5-methyl-4-((R)-3-methyl-2-((6-methylpyridin-2-yl)methyl)-1-oxo-1,2,3,4-tetrahydropyrrolo[1,2-a]pyrazin-7-yl)pyrimidin-2-yl)amino)pyridin-2-yl)but-3-yn-1-yl)octanamide (B1-8)*

Yellow solid; m.p. 159-160°C; <sup>1</sup>H NMR (400 MHz, DMSO-*d*<sub>6</sub>) δ 11.11 (s, 1H), 9.95 (s, 1H), 8.36 (s, 1H), 8.27 (d, J = 5.7 Hz, 1H), 8.08–7.98 (m, 2H), 7.75 (d, J = 1.5 Hz, 1H), 7.71–7.61 (m, 2H), 7.54 (t, J = 7.9 Hz, 1H), 7.40 (d, J = 1.7 Hz, 1H), 7.21–7.11 (m, 2H), 7.04–6.96 (m, 2H), 6.44 (t, J = 5.9 Hz, 1H), 5.17 (d, J = 16.0 Hz, 1H), 5.10–5.01 (m, 1H), 4.45–4.36 (m, 1H), 4.31 (d, J = 16.0 Hz, 1H), 4.23 (d, J = 10.8 Hz, 1H), 4.05–3.93 (m, 1H), 3.28 (q, J = 6.6 Hz, 2H), 3.19 (q, J = 6.7 Hz, 2H), 2.96–2.81 (m, 1H), 2.67–2.51 (m, 4H), 2.46 (s, 3H), 2.37 (s, 3H), 2.10–1.96 (m, 3H), 1.53–1.41 (m, 4H), 1.29–1.14 (m, 9H). <sup>13</sup>C NMR (101 MHz, DMSO-*d*<sub>6</sub>) δ 173.25, 172.75, 170.55, 169.39, 167.74, 160.03, 158.97, 158.19, 158.02, 157.87, 157.38, 150.35, 148.20, 146.81, 143.49, 137.62, 136.66, 132.60, 126.84, 124.90, 123.18, 122.03, 118.75, 118.48, 117.49, 115.54, 112.93, 111.78, 110.78, 109.44, 87.37, 82.30, 52.09, 49.37, 49.22, 49.01, 42.27, 38.05, 35.87, 31.45, 29.13, 29.08, 29.01, 26.66, 25.75, 24.48, 22.62, 19.91, 17.61, 17.46. HRMS (m/z): calculated for C<sub>50</sub>H<sub>53</sub>N<sub>11</sub>O<sub>6</sub> [M+H]<sup>+</sup>: 904.4253, found 904.4238. Purity: 99.0%.

*4.1.2.12. 10-((2-(2,6-dioxopiperidin-3-yl)-1,3-dioxoisindolin-4-yl)amino)-N-(4-(4-((5-methyl-4-((R)-3-methyl-2-((6-methylpyridin-2-yl)methyl)-1-oxo-1,2,3,4-tetrahydropyrrolo[1,2-a]pyrazin-7-yl)pyrimidin-2-yl)amino)pyridin-2-yl)but-3-yn-1-yl)decanamide (B1-10)*

Yellow solid; m.p. 140-141°C; <sup>1</sup>H NMR (400 MHz, DMSO-*d*<sub>6</sub>) δ 11.12 (s, 1H), 9.95 (s, 1H), 8.36 (s, 1H), 8.27 (d, J = 5.7 Hz, 1H), 8.05 (s, 1H), 8.00 (t, J = 5.7 Hz, 1H), 7.75 (s, 1H), 7.71–7.61 (m, 2H), 7.59–7.50 (m, 1H), 7.41 (s, 1H), 7.21–7.11 (m, 2H), 7.01 (t, J = 7.8 Hz, 2H), 6.46 (t, J = 5.9 Hz, 1H), 5.17 (d, J = 16.0 Hz, 1H), 5.11–5.01 (m, 1H), 4.45–4.36 (m, 1H), 4.31 (d, J = 16.0 Hz, 1H), 4.23 (d, J = 10.7 Hz, 1H), 4.03–3.96 (m, 1H), 3.33–3.16 (m, 4H), 2.96–2.82 (m, 1H), 2.65–2.55 (m, 4H), 2.46 (s, 3H), 2.37 (s, 3H), 2.04 (t, J = 7.4 Hz, 3H), 1.53–1.41 (m, 4H), 1.27–1.10 (m, 13H). <sup>13</sup>C NMR (101 MHz, DMSO-*d*<sub>6</sub>) δ 173.26, 172.77, 170.55, 169.40, 167.75, 160.04, 158.97, 158.21, 158.02, 157.87, 157.38, 150.35, 148.19, 146.83, 143.51, 137.62, 136.68, 132.61, 126.84, 124.90, 123.20, 122.03, 118.75, 118.46, 117.53, 115.54, 112.95, 111.78, 110.80, 109.44, 87.34, 82.32, 52.10, 49.37, 49.22, 49.01, 42.29, 38.04, 35.93, 31.46, 29.35, 29.27, 29.23, 29.14, 29.11, 26.77, 25.82, 24.48, 22.63, 19.91, 17.62, 17.46. HRMS (m/z): calculated for C<sub>52</sub>H<sub>57</sub>N<sub>11</sub>O<sub>6</sub> [M+H]<sup>+</sup>: 932.4566, found 932.4567. Purity: 95.2%.

*4.1.2.13. 12-((2-(2,6-dioxopiperidin-3-yl)-1,3-dioxoisindolin-4-yl)amino)-N-(4-(4-((5-methyl-4-((R)-3-methyl-2-((6-methylpyridin-2-yl)methyl)-1-oxo-1,2,3,4-tetrahydropyrrolo[1,2-*a*]pyrazin-7-yl)pyrimidin-2-yl)amino)pyridin-2-yl)but-3-yn-1-yl)dodecanamide (B1-12)*

Yellow solid; m.p. =146-147°C; <sup>1</sup>H NMR (400 MHz, DMSO-*d*<sub>6</sub>) δ 11.12 (s, 1H), 10.01 (s, 1H), 8.38 (s, 1H), 8.27 (d, J = 5.8 Hz, 1H), 8.07 (s, 1H), 8.01 (t, J = 5.7 Hz, 1H), 7.76 (s, 1H), 7.72–7.61 (m, 2H), 7.60–7.51 (m, 1H), 7.41 (d, J = 1.7 Hz, 1H), 7.21–7.11 (m, 2H), 7.07–6.97 (m, 2H), 6.48 (t, J = 5.9 Hz, 1H), 5.17 (d, J = 16.0 Hz, 1H), 5.11–5.01 (m, 1H), 4.45–4.36 (m, 1H), 4.31 (d, J = 16.0 Hz, 1H), 4.23 (d, J = 13.1 Hz, 1H), 4.04–3.93 (m, 1H), 3.30–3.20 (m, 4H), 2.96–2.82 (m, 1H), 2.66–2.51 (m, 4H), 2.46 (s, 3H), 2.38 (s, 3H), 2.04 (t, J = 7.4 Hz, 3H), 1.57–1.39 (m, 4H), 1.27–1.12 (m, 17H). <sup>13</sup>C NMR (101 MHz, DMSO-*d*<sub>6</sub>) δ 173.26, 172.79, 170.55, 169.41, 167.75, 160.04, 158.99, 158.16, 158.02, 157.86, 157.37, 149.98, 148.46, 146.85, 143.10, 137.64, 136.69, 132.62, 126.86, 124.91, 123.17, 122.04, 118.76, 118.58, 117.56, 115.55,

---

112.96, 111.79, 110.81, 109.44, 87.87, 81.96, 52.11, 49.38, 49.22, 49.01, 42.30, 38.01, 35.93, 31.45, 29.46, 29.37, 29.31, 29.24, 29.14, 29.12, 26.79, 25.82, 24.47, 22.63, 19.92, 17.63, 17.45. HRMS (m/z): calculated for C<sub>54</sub>H<sub>61</sub>N<sub>11</sub>O<sub>6</sub> [M+H]<sup>+</sup>: 960.4879, found 960.4887. Purity: 95.0%.

4.1.2.14. *2-(2-(2-(2-((2-(2,6-dioxopiperidin-3-yl)-1,3-dioxoisindolin-4-yl)amino)ethoxy)ethoxy)ethoxy)-N-(4-(4-((5-methyl-4-((R)-3-methyl-2-((6-methylpyridin-2-yl)methyl)-1-oxo-1,2,3,4-tetrahydropyrrolo[1,2-a]pyrazin-7-yl)pyrimidin-2-yl)amino)pyridin-2-yl)but-3-yn-1-yl)acetamide (B1-3P)*

Yellow solid; m.p. 133-134°C; <sup>1</sup>H NMR (400 MHz, CD<sub>3</sub>OD) δ 8.24 (s, 1H), 8.19 (d, J = 5.9 Hz, 1H), 7.98 (s, 1H), 7.76–7.67 (m, 2H), 7.64 (s, 1H), 7.56 (s, 1H), 7.41 (t, J = 8.5 Hz, 1H), 7.29 (d, J = 7.8 Hz, 1H), 7.21 (d, J = 7.7 Hz, 1H), 6.95–6.87 (m, 2H), 5.30 (d, J = 15.8 Hz, 1H), 5.04–4.99 (m, 1H), 4.61 (s, 1H), 4.46–4.35 (m, 2H), 4.18 (d, J = 11.4 Hz, 1H), 4.07–3.97 (m, 3H), 3.71–3.57 (m, 9H), 3.52 (t, J = 6.7 Hz, 2H), 3.42–3.35 (m, 2H), 2.91–2.64 (m, 5H), 2.55 (s, 3H), 2.38 (s, 3H), 2.15–2.06 (m, 1H), 1.28 (d, J = 6.6 Hz, 3H). <sup>13</sup>C NMR (101 MHz, CD<sub>3</sub>OD) δ 173.26, 171.62, 170.29, 169.16, 167.78, 159.27, 159.20, 158.87, 157.94, 157.58, 156.60, 148.91, 148.71, 146.54, 142.66, 137.81, 135.65, 132.28, 126.65, 124.00, 123.78, 122.15, 118.93, 118.68, 116.64, 115.39, 113.70, 111.36, 110.52, 109.99, 109.73, 87.21, 80.96, 70.70, 70.18, 70.05, 69.79, 69.07, 52.40, 48.92, 48.78, 41.73, 37.40, 30.81, 22.60, 22.44, 19.27, 16.43, 15.96. HRMS (m/z): calculated for C<sub>50</sub>H<sub>53</sub>N<sub>11</sub>O<sub>9</sub> [M+Na]<sup>+</sup>: 974.3920, found 974.3928. Purity: 96.0%.

4.1.2.15. *14-((2-(2,6-dioxopiperidin-3-yl)-1,3-dioxoisindolin-4-yl)amino)-N-(4-(4-((5-methyl-4-((R)-3-methyl-2-((6-methylpyridin-2-yl)methyl)-1-oxo-1,2,3,4-tetrahydropyrrolo[1,2-a]pyrazin-7-yl)pyrimidin-2-yl)amino)pyridin-2-yl)but-3-yn-1-yl)-3,6,9,12-tetraoxatetradecanamide (B1-4P)*

Yellow solid; m.p. 122-123°C; <sup>1</sup>H NMR (400 MHz, CD<sub>3</sub>OD) δ 8.27 (s, 1H), 8.21 (d, J = 6.0 Hz, 1H), 8.00 (s, 1H), 7.78–7.63 (m, 3H), 7.56 (d, J = 1.7 Hz, 1H), 7.43 (t, J = 7.8

Hz, 1H), 7.29 (d, J = 7.7 Hz, 1H), 7.21 (d, J = 7.7 Hz, 1H), 6.98 – 6.90 (m, 2H), 5.30 (d, J = 15.8 Hz, 1H), 5.06–4.96 (m, 1H), 4.47–4.36 (m, 2H), 4.19 (d, J = 13.1 Hz, 1H), 4.04 (s, 1H), 3.99 (s, 2H), 3.68–3.51 (m, 15H), 3.43–3.37 (m, 2H), 2.87–2.61 (m, 5H), 2.56 (s, 3H), 2.40 (s, 3H), 2.14–2.05 (m, 1H), 1.28 (d, J = 6.6 Hz, 3H). <sup>13</sup>C NMR (101 MHz, CD<sub>3</sub>OD) δ 173.22, 171.61, 170.24, 169.16, 167.77, 159.31, 159.31, 159.19, 158.92, 157.94, 157.55, 156.60, 149.07, 148.47, 146.60, 142.20, 137.79, 135.66, 132.32, 126.66, 124.03, 123.75, 122.14, 118.93, 118.85, 116.67, 115.39, 113.69, 111.34, 110.52, 109.75, 70.64, 70.22, 70.18, 70.13, 69.90, 69.78, 69.13, 52.40, 48.92, 48.78, 41.79, 37.37, 30.81, 22.60, 22.43, 19.30, 16.42, 15.95. HRMS (m/z): calculated for C<sub>52</sub>H<sub>57</sub>N<sub>11</sub>O<sub>10</sub> [M+H]<sup>+</sup>: 996.4363, found 996.4363. Purity: 98.2%.

*4.1.2.16. 17-((2-(2,6-dioxopiperidin-3-yl)-1,3-dioxoisindolin-4-yl)amino)-N-(4-(4-((5-methyl-4-((R)-3-methyl-2-((6-methylpyridin-2-yl)methyl)-1-oxo-1,2,3,4-tetrahydropyrrolo[1,2-a]pyrazin-7-yl)pyrimidin-2-yl)amino)pyridin-2-yl)but-3-yn-1-yl)-3,6,9,12,15-pentaoxaheptadecanamide (B1-5P)*

Yellow solid; m.p. 116–117°C; <sup>1</sup>H NMR (400 MHz, CD<sub>3</sub>OD) δ 8.26 (s, 1H), 8.21 (d, J = 5.9 Hz, 1H), 7.99 (s, 1H), 7.76–7.63 (m, 3H), 7.56 (s, 1H), 7.45 (t, J = 7.8 Hz, 1H), 7.28 (d, J = 7.8 Hz, 1H), 7.20 (d, J = 7.7 Hz, 1H), 6.95 (d, J = 7.5 Hz, 2H), 5.30 (d, J = 15.8 Hz, 1H), 5.07–4.96 (m, 1H), 4.47–4.35 (m, 2H), 4.19 (d, J = 13.1 Hz, 1H), 4.02 (d, J = 18.2 Hz, 3H), 3.70–3.47 (m, 19H), 3.40 (t, J = 5.7 Hz, 2H), 2.90–2.65 (m, 5H), 2.55 (s, 3H), 2.39 (s, 3H), 2.14–2.05 (m, 1H), 1.28 (d, J = 6.6 Hz, 3H). <sup>13</sup>C NMR (101 MHz, CD<sub>3</sub>OD) δ 173.24, 171.55, 170.21, 169.16, 167.78, 159.29, 159.18, 158.91, 157.94, 157.61, 156.61, 148.87, 148.78, 146.61, 142.61, 137.80, 135.68, 132.33, 126.65, 124.02, 123.78, 122.14, 118.93, 118.71, 116.70, 115.40, 113.69, 111.38, 110.54, 109.76, 87.32, 80.89, 70.61, 70.21, 70.15, 70.05, 69.88, 69.78, 69.13, 52.39, 48.91, 48.79, 41.81, 37.41, 30.82, 22.61, 22.45, 19.30, 16.43, 15.97. HRMS (m/z): calculated for C<sub>54</sub>H<sub>61</sub>N<sub>11</sub>O<sub>11</sub> [M+H]<sup>+</sup>: 1040.4625, found 1040.4645. Purity: 96.6%.

*4.1.2.17. 10-((2-(2,6-dioxopiperidin-3-yl)-1,3-dioxoisindolin-4-yl)amino)-N-(3-((4-*



---

*((5-methyl-4-((R)-3-methyl-2-((6-methylpyridin-2-yl)methyl)-1-oxo-1,2,3,4-tetrahydropyrrolo[1,2-a]pyrazin-7-yl)pyrimidin-2-yl)amino)pyridin-2-yl)amino)propyl)decanamide (B1-10N)*

Yellow solid; m.p. 110-111°C; <sup>1</sup>H NMR (400 MHz, DMSO-*d*<sub>6</sub>) δ 11.14 (s, 1H), 9.73 (s, 1H), 8.33 (s, 1H), 7.85 (s, 1H), 7.78 (s, 2H), 7.71–7.50 (m, 2H), 7.38 (s, 1H), 7.26 (s, 1H), 7.20–7.10 (m, 2H), 7.07–6.94 (m, 2H), 6.91 (d, *J* = 6.1 Hz, 1H), 6.76 (s, 1H), 6.47 (t, *J* = 5.9 Hz, 1H), 5.17 (d, *J* = 16.0 Hz, 1H), 5.11–5.01 (m, 1H), 4.45–4.21 (m, 3H), 4.04–3.93 (m, 1H), 3.33–3.07 (m, 7H), 2.96–2.83 (m, 1H), 2.65–2.54 (m, 1H), 2.46 (s, 3H), 2.37 (s, 3H), 2.03 (t, *J* = 7.4 Hz, 3H), 1.69 (t, *J* = 6.7 Hz, 2H), 1.58–1.39 (m, 4H), 1.28–1.15 (m, 13H). <sup>13</sup>C NMR (101 MHz, DMSO-*d*<sub>6</sub>) δ 173.27, 172.63, 170.55, 169.41, 167.75, 159.92, 158.97, 158.38, 158.06, 157.87, 157.38, 149.61, 146.84, 137.62, 136.68, 132.60, 126.88, 124.83, 123.20, 122.03, 118.71, 118.26, 117.53, 112.99, 110.81, 109.44, 103.94, 94.19, 52.09, 49.33, 49.18, 49.02, 42.30, 36.70, 35.97, 31.45, 29.36, 29.28, 29.21, 29.13, 26.77, 25.80, 24.47, 22.64, 17.59, 17.44. HRMS (*m/z*): calculated for C<sub>51</sub>H<sub>60</sub>N<sub>12</sub>O<sub>6</sub> [M+H]<sup>+</sup>: 937.4832, found 937.4848. Purity: 99.1%.

*4.1.2.18. 10-((2-(2,6-dioxopiperidin-3-yl)-1,3-dioxoisindolin-4-yl)amino)-N-(4-(3-((5-methyl-4-((R)-3-methyl-2-((6-methylpyridin-2-yl)methyl)-1-oxo-1,2,3,4-tetrahydropyrrolo[1,2-a]pyrazin-7-yl)pyrimidin-2-yl)amino)phenyl)but-3-yn-1-yl)decanamide (B1-10B)*

Yellow solid; m.p. 88-89°C; <sup>1</sup>H NMR (400 MHz, DMSO-*d*<sub>6</sub>) δ 11.13 (s, 1H), 9.45 (s, 1H), 8.28 (s, 1H), 8.07 (s, 1H), 7.99 (t, *J* = 5.8 Hz, 1H), 7.79–7.69 (m, 2H), 7.65 (t, *J* = 7.7 Hz, 1H), 7.55 (t, *J* = 7.8 Hz, 1H), 7.42 (s, 1H), 7.24 (t, *J* = 7.9 Hz, 1H), 7.21–7.11 (m, 2H), 7.05–6.97 (m, 2H), 6.94 (d, *J* = 7.5 Hz, 1H), 6.46 (t, *J* = 5.9 Hz, 1H), 5.18 (d, *J* = 15.9 Hz, 1H), 5.12–5.02 (m, 1H), 4.45–4.36 (m, 1H), 4.31 (d, *J* = 16.0 Hz, 1H), 4.22 (d, *J* = 13.1 Hz, 1H), 4.04–3.93 (m, 1H), 3.32–3.18 (m, 4H), 2.97–2.83 (m, 1H), 2.67–2.52 (m, 4H), 2.47 (s, 3H), 2.34 (s, 3H), 2.05 (t, *J* = 7.4 Hz, 3H), 1.56–1.41 (m, 4H), 1.27–1.17 (m, 13H). <sup>13</sup>C NMR (101 MHz, DMSO-*d*<sub>6</sub>) δ 173.26, 172.79, 170.55, 169.42, 167.76, 159.96, 158.75, 158.69, 158.09, 157.84, 157.36, 146.84, 141.75, 137.67,

---

136.67, 132.60, 129.03, 126.61, 124.74, 123.95, 123.62, 123.58, 122.06, 121.17, 118.77, 118.33, 117.51, 116.95, 113.03, 110.80, 109.45, 88.04, 82.11, 54.07, 52.11, 49.35, 49.18, 49.02, 42.31, 38.27, 35.97, 31.47, 29.36, 29.28, 29.24, 29.15, 29.12, 26.79, 25.86, 24.43, 22.65, 20.14, 18.52, 17.58, 17.43, 17.15. HRMS (m/z): calculated for C<sub>53</sub>H<sub>58</sub>N<sub>10</sub>O<sub>6</sub> [M+Na]<sup>+</sup>: 953.4433, found 953.4450. Purity: 97.7%.

4.1.2.19. 10-((2-(2,6-dioxopiperidin-3-yl)-1,3-dioxoisindolin-4-yl)amino)-N-(4-(3-((5-methyl-4-((R)-3-methyl-2-((6-methylpyridin-2-yl)methyl)-1-oxo-1,2,3,4-tetrahydropyrrolo[1,2-a]pyrazin-7-yl)pyrimidin-2-yl)amino)-1H-pyrazol-1-yl)butyl)decanamide (**B1-10BZ**)

Yellow solid; m.p. 96-97°C; <sup>1</sup>H NMR (400 MHz, DMSO-*d*<sub>6</sub>) δ 11.13 (s, 1H), 10.38 (s, 1H), 8.21 (s, 1H), 7.89–7.72 (m, 3H), 7.66 (t, *J* = 7.7 Hz, 1H), 7.56 (t, *J* = 7.7 Hz, 1H), 7.42 (s, 1H), 7.17 (t, *J* = 8.8 Hz, 2H), 7.06 (d, *J* = 8.6 Hz, 1H), 7.01 (d, *J* = 7.1 Hz, 1H), 6.50 (t, *J* = 6.0 Hz, 1H), 6.40 (s, 1H), 5.17 (d, *J* = 16.0 Hz, 1H), 5.11–5.02 (m, 1H), 4.41 (d, *J* = 9.2 Hz, 1H), 4.36–4.21 (m, 2H), 4.16 (s, 2H), 4.05–3.93 (m, 1H), 3.26 (q, *J* = 6.1, 5.5 Hz, 2H), 3.06 (q, *J* = 5.8, 5.0 Hz, 2H), 2.89 (t, *J* = 16.0 Hz, 1H), 2.65–2.53 (m, 2H), 2.47 (s, 3H), 2.39 (s, 3H), 2.03 (t, *J* = 7.4 Hz, 3H), 1.89–1.80 (m, 2H), 1.60–1.41 (m, 4H), 1.39–1.17 (m, 15H). <sup>13</sup>C NMR (101 MHz, DMSO-*d*<sub>6</sub>) δ 173.29, 172.46, 170.58, 169.41, 167.76, 157.91, 157.88, 157.36, 148.58, 146.85, 137.66, 136.71, 132.62, 125.06, 122.06, 118.71, 117.58, 113.26, 110.81, 109.43, 95.76, 52.09, 51.30, 49.40, 49.20, 49.00, 42.30, 40.59, 40.38, 40.17, 39.96, 39.75, 39.54, 39.33, 38.23, 35.91, 31.46, 29.37, 29.20, 29.13, 27.56, 26.77, 26.67, 25.76, 24.49, 22.64, 17.49. HRMS (m/z): calculated for C<sub>50</sub>H<sub>60</sub>N<sub>12</sub>O<sub>6</sub> [M+Na]<sup>+</sup>: 947.4651, found 947.4680. Purity: 99.3%.

4.1.2.20. N1-((S)-1-((2S,4R)-4-hydroxy-2-(((S)-1-(4-(4-methylthiazol-5-yl)phenyl)ethyl)carbamoyl)pyrrolidin-1-yl)-3,3-dimethyl-1-oxobutan-2-yl)-N4-(4-(4-((5-methyl-4-((R)-3-methyl-2-((6-methylpyridin-2-yl)methyl)-1-oxo-1,2,3,4-tetrahydropyrrolo[1,2-a]pyrazin-7-yl)pyrimidin-2-yl)amino)pyridin-2-yl)but-3-yn-1-yl)succinimide (**B2-4**)

White solid; m.p. 160-161°C; <sup>1</sup>H NMR (400 MHz, CD<sub>3</sub>OD) δ 8.85 (s, 1H), 8.23 (s, 1H), 8.20 (d, J = 5.9 Hz, 1H), 7.96 (d, J = 2.2 Hz, 1H), 7.78–7.73 (m, 1H), 7.69 (t, J = 7.7 Hz, 1H), 7.62 (s, 1H), 7.55 (d, J = 1.6 Hz, 1H), 7.40 (s, 4H), 7.26 (d, J = 7.8 Hz, 1H), 7.19 (d, J = 7.6 Hz, 1H), 5.28 (d, J = 15.8 Hz, 1H), 5.00 (q, J = 6.9 Hz, 1H), 4.64–4.56 (m, 2H), 4.47–4.35 (m, 3H), 4.17 (d, J = 13.0 Hz, 1H), 4.08–3.97 (m, 1H), 3.87 (d, J = 11.1 Hz, 1H), 3.77–3.68 (m, 1H), 3.49–3.40 (m, 2H), 2.70–2.59 (m, 3H), 2.58–2.49 (m, 6H), 2.46 (s, 3H), 2.37 (s, 3H), 2.25–2.15 (m, 1H), 2.02–1.90 (m, 1H), 1.49 (d, J = 7.0 Hz, 3H), 1.26 (d, J = 6.6 Hz, 3H), 1.03 (s, 9H). <sup>13</sup>C NMR (101 MHz, CD<sub>3</sub>OD) δ 173.31, 172.95, 171.82, 170.79, 159.27, 159.21, 158.88, 157.94, 157.61, 156.57, 151.39, 148.89, 148.71, 147.61, 144.16, 142.49, 137.79, 131.90, 130.06, 129.03, 126.61, 126.22, 123.96, 123.81, 122.14, 118.91, 118.70, 115.28, 113.74, 111.31, 87.55, 80.62, 69.59, 59.18, 57.71, 56.51, 52.39, 48.93, 48.69, 38.02, 37.40, 35.19, 30.88, 30.66, 25.69, 22.66, 21.01, 19.34, 16.49, 15.99, 14.47. HRMS (m/z): calculated for C<sub>56</sub>H<sub>64</sub>N<sub>12</sub>O<sub>6</sub>S [M+Na]<sup>+</sup>: 1055.4685, found 1055.4702. Purity: 100.0%.

4.1.2.21. *N1-((S)-1-((2S,4R)-4-hydroxy-2-(((S)-1-(4-(4-methylthiazol-5-yl)phenyl)ethyl)carbamoyl)pyrrolidin-1-yl)-3,3-dimethyl-1-oxobutan-2-yl)-N6-(4-(4-((5-methyl-4-((R)-3-methyl-2-((6-methylpyridin-2-yl)methyl)-1-oxo-1,2,3,4-tetrahydropyrrolo [1,2-a]pyrazin-7-yl)pyrimidin-2-yl)amino)pyridin-2-yl)but-3-yn-1-yl)adipamide (B2-6)*

White solid; m.p. 153-154°C; <sup>1</sup>H NMR (400 MHz, CD<sub>3</sub>OD) δ 8.85 (s, 1H), 8.26–8.18 (m, 2H), 7.98 (s, 1H), 7.74 (d, J = 6.1 Hz, 1H), 7.69 (t, J = 7.7 Hz, 1H), 7.63 (s, 1H), 7.56 (s, 1H), 7.44–7.35 (m, 4H), 7.26 (d, J = 7.8 Hz, 1H), 7.18 (d, J = 7.7 Hz, 1H), 5.28 (d, J = 15.7 Hz, 1H), 5.00 (q, J = 6.9 Hz, 1H), 4.65–4.55 (m, 2H), 4.46–4.35 (m, 3H), 4.17 (d, J = 13.2 Hz, 1H), 4.07–3.99 (m, 1H), 3.88 (d, J = 11.0 Hz, 1H), 3.78–3.69 (m, 1H), 3.49–3.39 (m, 2H), 2.68 (t, J = 6.6 Hz, 2H), 2.54 (s, 3H), 2.46 (s, 3H), 2.38 (s, 3H), 2.32–2.15 (m, 5H), 1.97 (ddd, J = 13.3, 9.0, 4.5 Hz, 1H), 1.70–1.57 (m, 4H), 1.49 (d, J = 7.0 Hz, 3H), 1.26 (d, J = 6.6 Hz, 3H), 1.03 (s, 9H). <sup>13</sup>C NMR (101 MHz, CD<sub>3</sub>OD) δ 174.57, 174.21, 174.13, 171.79, 170.91, 170.89, 159.30, 159.21, 158.91, 157.95, 157.65, 156.56, 151.37, 148.89, 148.80, 147.63, 144.15, 142.68, 137.77, 131.90,

---

130.08, 129.03, 126.61, 126.21, 123.98, 123.83, 122.14, 118.92, 118.69, 115.28, 113.76, 111.35, 87.41, 80.76, 69.58, 59.19, 57.76, 57.66, 56.58, 52.41, 48.96, 48.70, 37.94, 37.39, 35.34, 35.04, 34.86, 25.70, 25.17, 25.10, 22.67, 20.99, 19.33, 16.48, 16.00, 14.47. HRMS (m/z): calculated for C<sub>58</sub>H<sub>68</sub>N<sub>12</sub>O<sub>6</sub>S [M+Na]<sup>+</sup>: 1083.4998, found 1083.5025. Purity: 100.0%.

4.1.2.22. *N1-((S)-1-((2S,4R)-4-hydroxy-2-(((S)-1-(4-(4-methylthiazol-5-yl)phenyl)ethyl)carbamoyl)pyrrolidin-1-yl)-3,3-dimethyl-1-oxobutan-2-yl)-N8-(4-(4-((5-methyl-4-((R)-3-methyl-2-((6-methylpyridin-2-yl)methyl)-1-oxo-1,2,3,4-tetrahydropyrrolo [1,2-a]pyrazin-7-yl)pyrimidin-2-yl)amino)pyridin-2-yl)but-3-yn-1-yl)octanediamide (B2-8)*

White solid; m.p. 155-156°C; <sup>1</sup>H NMR (400 MHz, CD<sub>3</sub>OD) δ 8.86 (s, 1H), 8.27 (s, 1H), 8.22 (d, J = 5.9 Hz, 1H), 8.06 (d, J = 2.2 Hz, 1H), 7.76–7.64 (m, 3H), 7.60 (d, J = 1.7 Hz, 1H), 7.46–7.37 (m, 4H), 7.27 (d, J = 7.8 Hz, 1H), 7.20 (d, J = 7.7 Hz, 1H), 5.29 (d, J = 15.8 Hz, 1H), 5.00 (q, J = 7.0 Hz, 1H), 4.65–4.55 (m, 2H), 4.47–4.36 (m, 3H), 4.24–4.16 (m, 1H), 4.08–4.00 (m, 1H), 3.89 (d, J = 11.1 Hz, 1H), 3.78–3.70 (m, 1H), 3.49–3.37 (m, 2H), 2.69 (t, J = 6.6 Hz, 2H), 2.54 (s, 3H), 2.47 (s, 3H), 2.40 (s, 3H), 2.28–2.10 (m, 5H), 2.02–1.90 (m, 1H), 1.65–1.46 (m, 7H), 1.35–1.22 (m, 7H), 1.03 (s, 9H). <sup>13</sup>C NMR (101 MHz, CD<sub>3</sub>OD) δ 174.97, 174.46, 171.82, 170.89, 159.35, 159.23, 158.93, 157.96, 157.68, 156.56, 151.40, 148.88, 148.78, 147.62, 144.19, 142.64, 137.78, 131.91, 130.07, 129.04, 126.65, 126.21, 123.99, 123.84, 122.15, 118.92, 118.72, 115.27, 113.76, 111.38, 87.54, 80.67, 69.57, 59.20, 57.60, 56.59, 52.44, 48.97, 48.71, 37.84, 37.40, 35.68, 35.12, 35.03, 28.54, 25.67, 25.58, 25.39, 22.64, 21.00, 19.29, 16.47, 15.97, 14.44. HRMS (m/z): calculated for C<sub>60</sub>H<sub>72</sub>N<sub>12</sub>O<sub>6</sub>S [M+Na]<sup>+</sup>: 1111.5311, found 1111.5338. Purity: 99.2%.

4.1.2.23. *N1-((S)-1-((2S,4R)-4-hydroxy-2-(((S)-1-(4-(4-methylthiazol-5-yl)phenyl)ethyl)carbamoyl)pyrrolidin-1-yl)-3,3-dimethyl-1-oxobutan-2-yl)-N10-(4-(4-((5-methyl-4-((R)-3-methyl-2-((6-methylpyridin-2-yl)methyl)-1-oxo-1,2,3,4-*

---

*tetrahydropyrrolo[1,2-*a*]pyrazin-7-yl)pyrimidin-2-yl)amino)pyridin-2-yl)but-3-yn-1-yl)decanediamide (B2-10)*

White solid; m.p. 144-145°C; <sup>1</sup>H NMR (400 MHz, CD<sub>3</sub>OD) δ 8.86 (s, 1H), 8.25 (s, 1H), 8.21 (d, J = 5.9 Hz, 1H), 8.14 (d, J = 2.2 Hz, 1H), 7.73–7.63 (m, 3H), 7.59 (d, J = 1.7 Hz, 1H), 7.43–7.37 (m, 4H), 7.26 (d, J = 7.8 Hz, 1H), 7.18 (d, J = 7.7 Hz, 1H), 5.28 (d, J = 15.7 Hz, 1H), 5.01 (q, J = 7.1 Hz, 1H), 4.67–4.58 (m, 2H), 4.48–4.35 (m, 3H), 4.23–4.14 (m, 1H), 4.09–3.99 (m, 1H), 3.90 (d, J = 10.9 Hz, 1H), 3.80–3.71 (m, 1H), 3.44 (t, J = 6.5 Hz, 2H), 2.70 (t, J = 6.4 Hz, 2H), 2.54 (s, 3H), 2.46 (s, 3H), 2.39 (s, 3H), 2.27–2.10 (m, 5H), 2.05–1.91 (m, 1H), 1.61–1.45 (m, 7H), 1.30–1.14 (m, 11H), 1.05 (s, 9H). <sup>13</sup>C NMR (101 MHz, CD<sub>3</sub>OD) δ 174.98, 174.53, 171.79, 170.95, 159.32, 159.19, 158.89, 157.94, 157.66, 156.58, 151.38, 148.80, 147.62, 144.17, 142.76, 137.75, 131.90, 130.08, 129.03, 126.63, 126.22, 124.01, 123.85, 122.13, 118.93, 118.65, 115.29, 113.80, 111.47, 87.47, 80.84, 69.57, 59.23, 57.62, 56.64, 52.45, 49.00, 48.93, 48.71, 37.82, 37.42, 35.83, 35.28, 35.09, 28.98, 28.89, 28.86, 25.73, 25.58, 22.68, 21.00, 19.25, 16.53, 16.03, 14.49. HRMS (m/z): calculated for C<sub>62</sub>H<sub>76</sub>N<sub>12</sub>O<sub>6</sub>S [M+Na]<sup>+</sup>: 1139.5624, found 1139.5639. Purity: 99.4%.

4.1.2.24. *N1-((S)-1-((2S,4R)-4-hydroxy-2-(((S)-1-(4-(4-methylthiazol-5-yl)phenyl)ethyl)carbamoyl)pyrrolidin-1-yl)-3,3-dimethyl-1-oxobutan-2-yl)-N12-(4-(4-((5-methyl-4-((R)-3-methyl-2-((6-methylpyridin-2-yl)methyl)-1-oxo-1,2,3,4-tetrahydropyrrolo[1,2-*a*]pyrazin-7-yl)pyrimidin-2-yl)amino)pyridin-2-yl)but-3-yn-1-yl)dodecanediamide (B2-12)*

White solid; m.p. 143-144°C; <sup>1</sup>H NMR (400 MHz, CD<sub>3</sub>OD) δ 8.86 (s, 1H), 8.27 (s, 1H), 8.22 (d, J = 6.0 Hz, 1H), 8.17 (d, J = 2.2 Hz, 1H), 7.76–7.64 (m, 3H), 7.61 (d, J = 1.7 Hz, 1H), 7.46–7.37 (m, 4H), 7.27 (d, J = 7.7 Hz, 1H), 7.19 (d, J = 7.7 Hz, 1H), 5.29 (d, J = 15.7 Hz, 1H), 5.01 (q, J = 6.9 Hz, 1H), 4.69–4.57 (m, 2H), 4.49–4.35 (m, 3H), 4.25–4.16 (m, 1H), 4.08–4.01 (m, 1H), 3.94–3.86 (m, 1H), 3.81–3.72 (m, 1H), 3.44 (t, J = 6.4 Hz, 2H), 2.71 (t, J = 6.4 Hz, 2H), 2.54 (s, 3H), 2.47 (s, 3H), 2.41 (s, 3H), 2.29–2.10 (m, 5H), 2.05–1.92 (m, 1H), 1.63–1.44 (m, 7H), 1.31–1.10 (m, 15H), 1.05 (s, 9H). <sup>13</sup>C

NMR (101 MHz, CD<sub>3</sub>OD)  $\delta$  175.05, 174.67, 174.59, 171.79, 170.97, 159.34, 159.21, 158.91, 157.94, 157.69, 156.57, 151.40, 148.82, 147.62, 144.17, 142.79, 137.76, 131.91, 130.08, 129.04, 126.66, 126.22, 124.01, 123.87, 122.15, 118.94, 118.65, 115.29, 113.82, 111.47, 87.45, 80.83, 69.56, 59.23, 57.62, 56.65, 52.47, 49.02, 48.72, 37.81, 37.41, 35.85, 35.27, 35.12, 29.15, 29.09, 28.94, 28.89, 28.86, 25.82, 25.73, 25.60, 22.66, 21.00, 19.21, 16.53, 16.02, 14.47. HRMS (m/z): calculated for C<sub>64</sub>H<sub>80</sub>N<sub>12</sub>O<sub>6</sub>S [M+Na]<sup>+</sup>: 1167.5937, found 1167.5964. Purity: 96.8%.

4.1.2.25. *N1-((S)-1-((2S,4R)-4-hydroxy-2-(((S)-1-(4-(4-methylthiazol-5-yl)phenyl)ethyl)carbamoyl)pyrrolidin-1-yl)-3,3-dimethyl-1-oxobutan-2-yl)-N14-(4-(4-((5-methyl-4-((R)-3-methyl-2-((6-methylpyridin-2-yl)methyl)-1-oxo-1,2,3,4-tetrahydropyrrolo[1,2-a]pyrazin-7-yl)pyrimidin-2-yl)amino)pyridin-2-yl)but-3-yn-1-yl)tetradecanediamide (B2-14)*

White solid; m.p. 128-129°C; <sup>1</sup>H NMR (400 MHz, CD<sub>3</sub>OD)  $\delta$  8.87 (s, 1H), 8.32 (s, 1H), 8.23 (d, J = 6.0 Hz, 1H), 8.16 (s, 1H), 7.75–7.65 (m, 3H), 7.64 (d, J = 1.7 Hz, 1H), 7.47–7.31 (m, 4H), 7.28 (d, J = 7.8 Hz, 1H), 7.20 (d, J = 7.6 Hz, 1H), 5.30 (d, J = 15.8 Hz, 1H), 5.00 (q, J = 6.9 Hz, 1H), 4.65–4.55 (m, 2H), 4.49–4.36 (m, 3H), 4.26–4.17 (m, 1H), 4.11–4.01 (m, 1H), 3.89 (d, J = 11.0 Hz, 1H), 3.80–3.71 (m, 1H), 3.48–3.39 (m, 2H), 2.70 (t, J = 6.4 Hz, 2H), 2.55 (s, 3H), 2.50–2.41 (m, 6H), 2.33–2.13 (m, 5H), 2.02–1.90 (m, 1H), 1.63–1.46 (m, 7H), 1.31–1.10 (m, 19H), 1.04 (s, 9H). <sup>13</sup>C NMR (101 MHz, CD<sub>3</sub>OD)  $\delta$  175.11, 174.59, 171.79, 170.94, 159.37, 159.24, 159.00, 157.96, 157.75, 156.56, 151.38, 148.93, 148.72, 147.64, 144.18, 142.75, 137.74, 131.90, 130.09, 129.04, 126.63, 126.19, 124.04, 123.89, 122.12, 118.94, 118.70, 115.25, 113.78, 111.40, 87.52, 80.68, 69.53, 59.19, 57.58, 56.05, 52.48, 49.01, 48.71, 37.75, 37.35, 35.80, 35.24, 35.09, 29.27, 29.23, 29.18, 29.15, 29.08, 28.96, 28.85, 28.82, 25.79, 25.66, 25.57, 22.59, 20.93, 19.15, 16.41, 15.94, 14.37. HRMS (m/z): calculated for C<sub>66</sub>H<sub>84</sub>N<sub>12</sub>O<sub>6</sub>S [M+H]<sup>+</sup>: 1173.6430, found 1173.6461. Purity: 96.3%.

4.1.2.26. *N1-((S)-1-((2S,4R)-4-hydroxy-2-(((S)-1-(4-(4-methylthiazol-5-yl)phenyl)*

---

*ethyl)carbamoyl)pyrrolidin-1-yl)-3,3-dimethyl-1-oxobutan-2-yl)-N12-(3-((4-((5-methyl-4-((R)-3-methyl-2-((6-methylpyridin-2-yl)methyl)-1-oxo-1,2,3,4-tetrahydropyrrolo[1,2-a]pyrazin-7-yl)pyrimidin-2-yl)amino)pyridin-2-yl)amino)propyl)dodecanediamide (B2-12N)*

White solid; m.p. 133-134°C; <sup>1</sup>H NMR (400 MHz, CD<sub>3</sub>OD) δ 8.86 (s, 1H), 8.24 (s, 1H), 7.75–7.64 (m, 3H), 7.60 (s, 1H), 7.50 (s, 1H), 7.44–7.36 (m, 4H), 7.26 (d, J = 7.8 Hz, 1H), 7.19 (d, J = 7.7 Hz, 1H), 6.81 (d, J = 6.4 Hz, 1H), 5.30 (d, J = 15.8 Hz, 1H), 5.01 (q, J = 7.0 Hz, 1H), 4.67–4.57 (m, 2H), 4.49–4.35 (m, 3H), 4.20 (d, J = 13.1 Hz, 1H), 4.09–3.98 (m, 1H), 3.90 (d, J = 12.7 Hz, 1H), 3.81–3.72 (m, 1H), 3.37–3.30 (m, 4H), 2.54 (s, 3H), 2.46 (s, 3H), 2.38 (s, 3H), 2.33–2.09 (m, 5H), 2.03–1.93 (m, 1H), 1.90–1.81 (m, 2H), 1.63–1.46 (m, 7H), 1.30–1.17 (m, 15H), 1.05 (s, 9H). <sup>13</sup>C NMR (101 MHz, CD<sub>3</sub>OD) δ 174.92, 174.56, 171.79, 170.94, 159.27, 158.89, 158.10, 157.97, 157.85, 156.52, 151.39, 150.09, 147.63, 144.18, 143.18, 137.76, 131.90, 130.08, 129.04, 126.66, 126.22, 123.85, 122.15, 118.89, 118.51, 113.86, 109.99, 103.94, 93.92, 69.56, 59.23, 57.60, 56.63, 52.42, 48.94, 48.72, 39.22, 37.43, 36.57, 35.85, 35.28, 35.13, 29.16, 29.01, 28.91, 28.52, 25.74, 25.69, 25.62, 22.71, 21.03, 16.55, 16.01, 14.50. HRMS (m/z): calculated for C<sub>63</sub>H<sub>83</sub>N<sub>13</sub>O<sub>6</sub>S [M+H]<sup>+</sup>: 1150.6383, found 1150.6415. Purity: 99.1%.

4.1.2.27. *(R,E)-7-(2,6-dimethoxy-4-(3-oxo-3-(6-oxo-3,6-dihydropyridin-1(2H)-yl)prop-1-en-1-yl)phenoxy)-N-(4-(4-((5-methyl-4-(3-methyl-2-((6-methylpyridin-2-yl)methyl)-1-oxo-1,2,3,4-tetrahydropyrrolo[1,2-a]pyrazin-7-yl)pyrimidin-2-yl)amino)pyridin-2-yl)but-3-yn-1-yl)heptanamide (B3)*

White solid; m.p. 105-106°C; <sup>1</sup>H NMR (400 MHz, CDCl<sub>3</sub>) δ 8.27 (d, J = 5.7 Hz, 1H), 8.19 (s, 2H), 7.86 (s, 1H), 7.60 (d, J = 15.5 Hz, 1H), 7.56–7.45 (m, 3H), 7.42–7.31 (m, 2H), 7.14 (d, J = 7.7 Hz, 1H), 7.02 (d, J = 7.6 Hz, 1H), 6.95–6.86 (m, 1H), 6.75 (t, J = 6.0 Hz, 1H), 6.71 (s, 2H), 6.00 (d, J = 9.8 Hz, 1H), 5.39 (d, J = 15.4 Hz, 1H), 4.33–4.25 (m, 1H), 4.21 (d, J = 15.5 Hz, 1H), 4.02 – 3.86 (m, 6H), 3.78 (s, 6H), 3.51–3.40 (m, 2H), 2.64 (t, J = 6.3 Hz, 2H), 2.49 (s, 3H), 2.43 (q, J = 4.5 Hz, 2H), 2.35 (s, 3H), 2.14

(t,  $J = 7.6$  Hz, 2H), 1.70–1.55 (m, 4H), 1.41–1.25 (m, 4H), 1.23 (d,  $J = 6.6$  Hz, 3H).  $^{13}\text{C}$  NMR (101 MHz,  $\text{CDCl}_3$ )  $\delta$  173.47, 168.86, 165.84, 159.58, 159.07, 158.27, 157.96, 157.60, 156.75, 153.48, 149.92, 147.52, 145.64, 143.75, 143.46, 139.29, 137.15, 130.29, 125.69, 125.56, 124.79, 123.89, 122.04, 120.89, 119.01, 118.69, 115.50, 113.93, 111.43, 105.53, 87.15, 81.88, 77.38, 73.35, 56.10, 51.68, 49.65, 49.42, 41.64, 38.12, 36.49, 29.88, 28.99, 25.73, 25.50, 24.77, 24.43, 20.29, 17.62, 17.24. HRMS ( $m/z$ ): calculated for  $\text{C}_{52}\text{H}_{57}\text{N}_9\text{O}_7$   $[\text{M}+\text{Na}]^+$ : 942.4273, found 942.4268. Purity: 98.1%.

4.1.2.28. *(R)-N1-(adamantan-1-yl)-N10-(4-(4-((5-methyl-4-(3-methyl-2-((6-methylpyridin-2-yl)methyl)-1-oxo-1,2,3,4-tetrahydropyrrolo[1,2-a]pyrazin-7-yl)pyrimidin-2-yl)amino)pyridin-2-yl)but-3-yn-1-yl)decanediamide (B4)*

White solid; m.p. 130–131°C;  $^1\text{H}$  NMR (400 MHz,  $\text{CD}_3\text{OD}$ )  $\delta$  8.23 (s, 1H), 8.20 (d,  $J = 5.9$  Hz, 1H), 8.05 (d,  $J = 1.9$  Hz, 1H), 7.74–7.65 (m, 2H), 7.63 (d,  $J = 1.6$  Hz, 1H), 7.57 (d,  $J = 1.4$  Hz, 1H), 7.26 (d,  $J = 7.7$  Hz, 1H), 7.19 (d,  $J = 7.6$  Hz, 1H), 5.28 (d,  $J = 15.7$  Hz, 1H), 4.45–4.35 (m, 2H), 4.23–4.14 (m, 1H), 4.08–4.00 (m, 1H), 3.44 (t,  $J = 6.6$  Hz, 2H), 2.69 (t,  $J = 6.5$  Hz, 2H), 2.54 (s, 3H), 2.38 (s, 3H), 2.17 (t,  $J = 7.4$  Hz, 2H), 2.07–1.95 (m, 11H), 1.67 (s, 6H), 1.62–1.53 (m, 2H), 1.51–1.42 (m, 2H), 1.30–1.16 (m, 11H).  $^{13}\text{C}$  NMR (101 MHz,  $\text{CD}_3\text{OD}$ )  $\delta$  175.01, 174.04, 159.31, 159.18, 158.82, 157.94, 157.64, 156.57, 148.89, 148.65, 142.57, 137.74, 126.60, 123.96, 123.86, 122.13, 118.91, 118.64, 115.25, 113.78, 111.34, 87.57, 80.68, 52.42, 51.22, 48.95, 40.95, 37.85, 36.56, 36.12, 35.78, 29.48, 28.95, 28.88, 28.85, 28.76, 25.74, 25.72, 22.68, 19.29, 16.54, 16.00. HRMS ( $m/z$ ): calculated for  $\text{C}_{49}\text{H}_{61}\text{N}_9\text{O}_3$   $[\text{M}+\text{Na}]^+$ : 846.4790, found 846.4786. Purity: 99.4%.

#### 4.1.3. General Procedure for B1-10J, B1-10P, B2-12J and B2-12P.

A mixture of ligands of ERK1/2 (1 eq), complex of E3 ligand and linker (1 eq),  $\text{K}_2\text{CO}_3$  (2 eq), DMF was stirred at 80°C for 8 hours. Then the mixture was dissolved in EA and washed with brine, dried over  $\text{Na}_2\text{SO}_4$ , filtered and concentrated. The crude product was purified by column chromatography ( $\text{DCM}:\text{MeOH} = 10:1$ , 0.3% ammonia). The



---

corresponding Amide compound (15–48%) was obtained.

*4.1.3.1. 2-(2,6-dioxopiperidin-3-yl)-4-((10-(methyl(4-(4-((5-methyl-4-((R)-3-methyl-2-((6-methylpyridin-2-yl)methyl)-1-oxo-1,2,3,4-tetrahydropyrrolo[1,2-a]pyrazin-7-yl)pyrimidin-2-yl)amino)pyridin-2-yl)but-3-yn-1-yl)amino)decyl)amino)isoindoline-1,3-dione (B1-10J)*

Yellow solid; m.p. 128–129°C; <sup>1</sup>H NMR (400 MHz, DMSO-*d*<sub>6</sub>) δ 11.12 (s, 1H), 9.93 (s, 1H), 8.36 (s, 1H), 8.26 (d, *J* = 5.7 Hz, 1H), 8.07 (s, 1H), 7.74 (s, 1H), 7.69–7.60 (m, 2H), 7.54 (t, *J* = 7.6 Hz, 1H), 7.41 (s, 1H), 7.20–7.10 (m, 2H), 7.01 (t, *J* = 7.7 Hz, 2H), 6.46 (t, *J* = 5.9 Hz, 1H), 5.18 (d, *J* = 16.0 Hz, 1H), 5.06 (t, *J* = 12.9, 5.4 Hz, 1H), 4.44–4.34 (m, 1H), 4.30 (d, *J* = 16.0 Hz, 1H), 4.22 (d, *J* = 13.1 Hz, 1H), 4.04–3.92 (m, 1H), 3.22 (q, *J* = 6.6 Hz, 2H), 2.96–2.82 (m, 1H), 2.68–2.54 (m, 5H), 2.46 (s, 3H), 2.36 (s, 5H), 2.20 (s, 3H), 2.09–1.98 (m, 1H), 1.55–1.46 (m, 2H), 1.40–1.32 (m, 2H), 1.30–1.12 (m, 16H). <sup>13</sup>C NMR (101 MHz, DMSO-*d*<sub>6</sub>) δ 173.24, 170.52, 169.41, 167.75, 160.02, 158.95, 158.21, 157.96, 157.85, 157.39, 150.32, 148.19, 146.84, 143.64, 137.60, 136.67, 132.59, 126.80, 124.92, 123.21, 122.02, 118.72, 118.44, 117.51, 115.40, 112.95, 111.71, 110.80, 109.45, 88.37, 82.17, 56.81, 55.79, 52.04, 49.38, 49.16, 49.02, 42.30, 41.84, 31.46, 29.49, 29.45, 29.23, 29.14, 27.26, 27.04, 26.78, 24.47, 22.65, 17.64, 17.45, 17.20. HRMS (*m/z*): calculated for C<sub>53</sub>H<sub>61</sub>N<sub>11</sub>O<sub>5</sub> [*M*+H]<sup>+</sup>: 932.4930, found 932.4938. Purity: 99.6%.

*4.1.3.2. 2-(2,6-dioxopiperidin-3-yl)-4-((8-(4-(4-(4-((5-methyl-4-((R)-3-methyl-2-((6-methylpyridin-2-yl)methyl)-1-oxo-1,2,3,4-tetrahydropyrrolo[1,2-a]pyrazin-7-yl)pyrimidin-2-yl)amino)pyridin-2-yl)but-3-yn-1-yl)piperazin-1-yl)octyl)amino)isoindoline-1,3-dione (B1-10P)*

Yellow solid; m.p. 134–135°C; <sup>1</sup>H NMR (400 MHz, DMSO-*d*<sub>6</sub>) δ 11.11 (s, 1H), 9.94 (s, 1H), 8.37 (s, 1H), 8.26 (d, *J* = 5.7 Hz, 1H), 8.06 (s, 1H), 7.75 (s, 1H), 7.69–7.61 (m, 2H), 7.57 (t, *J* = 7.9 Hz, 1H), 7.41 (s, 1H), 7.21–7.11 (m, 2H), 7.06 (d, *J* = 8.6 Hz, 1H), 7.01 (d, *J* = 7.0 Hz, 1H), 6.50 (t, *J* = 5.9 Hz, 1H), 5.17 (d, *J* = 16.0 Hz, 1H), 5.10–5.01

(m, 1H), 4.45–4.35 (m, 1H), 4.35–4.19 (m, 2H), 4.04–3.93 (m, 1H), 3.27 (q, J = 6.7 Hz, 4H), 2.96–2.82 (m, 1H), 2.67–2.53 (m, 6H), 2.49–2.35 (m, 11H), 2.28 (t, J = 6.7 Hz, 2H), 2.09–1.97 (m, 1H), 1.56 (t, J = 7.0 Hz, 2H), 1.44–1.15 (m, 14H). <sup>13</sup>C NMR (101 MHz, DMSO-*d*<sub>6</sub>) δ 173.26, 170.53, 169.42, 167.76, 160.07, 158.98, 158.21, 157.97, 157.86, 157.41, 150.37, 148.21, 146.88, 143.60, 137.64, 136.72, 132.62, 126.84, 124.93, 123.18, 122.03, 118.68, 118.49, 117.60, 115.42, 112.92, 111.74, 110.84, 109.46, 88.30, 82.13, 58.03, 56.61, 52.92, 52.35, 52.06, 49.39, 49.17, 49.02, 42.31, 31.46, 29.31, 29.16, 29.12, 27.23, 26.74, 26.33, 24.49, 22.65, 17.64, 17.49, 17.22. HRMS (m/z): calculated for C<sub>54</sub>H<sub>62</sub>N<sub>12</sub>O<sub>5</sub> [M+H]<sup>+</sup>: 959.5039, found 959.5038. Purity: 98.9%.

*4.1.3.3. (2S,4R)-1-((S)-3,3-dimethyl-2-(12-(methyl(4-(4-((5-methyl-4-((R)-3-methyl-2-((6-methylpyridin-2-yl)methyl)-1-oxo-1,2,3,4-tetrahydropyrrolo[1,2-a]pyrazin-7-yl)pyrimidin-2-yl)amino)pyridin-2-yl)but-3-yn-1-yl)amino)dodecanamido)butanoyl)-4-hydroxy-N-((S)-1-(4-(4-methylthiazol-5-yl)phenyl)ethyl)pyrrolidine-2-carboxamide (B2-12J)*

White solid; m.p. 123–124°C; <sup>1</sup>H NMR (400 MHz, CD<sub>3</sub>OD) δ 8.86 (s, 1H), 8.27 (s, 1H), 8.22 (d, J = 5.9 Hz, 1H), 8.08 (d, J = 2.2 Hz, 1H), 7.75–7.67 (m, 2H), 7.66 (d, J = 1.7 Hz, 1H), 7.60 (d, J = 1.7 Hz, 1H), 7.41 (s, 4H), 7.27 (d, J = 7.7 Hz, 1H), 7.20 (d, J = 7.6 Hz, 1H), 5.31 (d, J = 15.8 Hz, 1H), 5.01 (q, J = 7.0 Hz, 1H), 4.67–4.56 (m, 2H), 4.49–4.34 (m, 3H), 4.19 (d, J = 13.0 Hz, 1H), 4.09–3.97 (m, 1H), 3.94–3.86 (m, 1H), 3.81–3.72 (m, 1H), 2.88 (t, J = 7.3 Hz, 2H), 2.73 (t, J = 7.2 Hz, 2H), 2.61–2.52 (m, 5H), 2.47 (s, 3H), 2.43–2.36 (m, 6H), 2.32–2.14 (m, 3H), 2.04–1.92 (m, 1H), 1.62–1.45 (m, 7H), 1.31–1.20 (m, 17H), 1.05 (s, 9H). <sup>13</sup>C NMR (101 MHz, CD<sub>3</sub>OD) δ 174.58, 171.78, 170.93, 159.29, 159.16, 158.95, 157.95, 157.70, 156.58, 151.39, 148.88, 148.82, 147.63, 144.18, 142.75, 137.78, 131.91, 130.08, 129.04, 126.61, 126.22, 124.01, 123.84, 122.15, 118.90, 118.66, 115.27, 113.78, 111.41, 87.59, 80.93, 69.56, 59.21, 57.59, 56.70, 56.62, 55.05, 52.32, 48.87, 48.71, 40.75, 37.39, 35.29, 35.12, 29.30, 29.24, 29.18, 29.01, 28.90, 27.08, 26.18, 25.73, 25.61, 22.68, 21.01, 16.52, 16.18, 15.99, 14.48. HRMS (m/z): calculated for C<sub>65</sub>H<sub>84</sub>N<sub>12</sub>O<sub>5</sub>S [M+H]<sup>+</sup>: 1145.6481, found 1145.6522.

---

Purity: 98.0%.

4.1.3.4. (2*S*,4*R*)-1-((*S*)-3,3-dimethyl-2-(10-(4-(4-(4-((5-methyl-4-((*R*)-3-methyl-2-((6-methylpyridin-2-yl)methyl)-1-oxo-1,2,3,4-tetrahydropyrrolo[1,2-*a*]pyrazin-7-yl)pyrimidin-2-yl)amino)pyridin-2-yl)but-3-yn-1-yl)piperazin-1-yl)decanamido)butanoyl)-4-hydroxy-*N*-((*S*)-1-(4-(4-methylthiazol-5-yl)phenyl)ethyl)pyrrolidine-2-carboxamide (**B2-12P**)

White solid; m.p. 145-146°C; <sup>1</sup>H NMR (400 MHz, CD<sub>3</sub>OD) δ 8.87 (s, 1H), 8.27 (s, 1H), 8.22 (d, *J* = 5.9 Hz, 1H), 8.01 (s, 1H), 7.78–7.64 (m, 3H), 7.59 (s, 1H), 7.47–7.34 (m, 4H), 7.27 (d, *J* = 7.7 Hz, 1H), 7.20 (d, *J* = 7.7 Hz, 1H), 5.31 (d, *J* = 15.8 Hz, 1H), 5.01 (q, *J* = 7.0 Hz, 1H), 4.65 (s, 1H), 4.60 (t, *J* = 8.3 Hz, 1H), 4.48–4.35 (m, 3H), 4.19 (d, *J* = 13.1 Hz, 1H), 4.08 – 3.98 (m, 1H), 3.90 (d, *J* = 11.1 Hz, 1H), 3.80–3.73 (m, 1H), 2.81 – 2.59 (m, 11H), 2.57–2.45 (m, 9H), 2.41 (s, 3H), 2.33–2.18 (m, 3H), 2.04–1.93 (m, 1H), 1.66–1.48 (m, 7H), 1.34–1.26 (m, 13H), 1.06 (s, 9H). <sup>13</sup>C NMR (101 MHz, CD<sub>3</sub>OD) δ 174.58, 171.79, 170.90, 159.28, 159.19, 158.97, 157.95, 157.71, 156.58, 151.40, 148.87, 148.82, 147.63, 144.20, 142.81, 137.80, 131.91, 130.09, 129.05, 126.62, 126.21, 123.99, 123.82, 122.15, 118.86, 118.69, 115.25, 113.74, 111.30, 87.87, 80.66, 69.55, 59.19, 57.88, 57.57, 56.59, 56.03, 52.34, 52.24, 51.42, 48.87, 48.71, 37.39, 35.26, 35.11, 29.04, 28.95, 28.88, 26.97, 25.69, 25.59, 25.47, 22.67, 21.00, 16.67, 16.48, 15.96, 14.46. HRMS (*m/z*): calculated for C<sub>66</sub>H<sub>85</sub>N<sub>13</sub>O<sub>5</sub>S [M+H]<sup>+</sup>: 1172.6590, found 1172.6618. Purity: 95.3%.

## 5. <sup>1</sup>H NMR and <sup>13</sup>C NMR spectrum

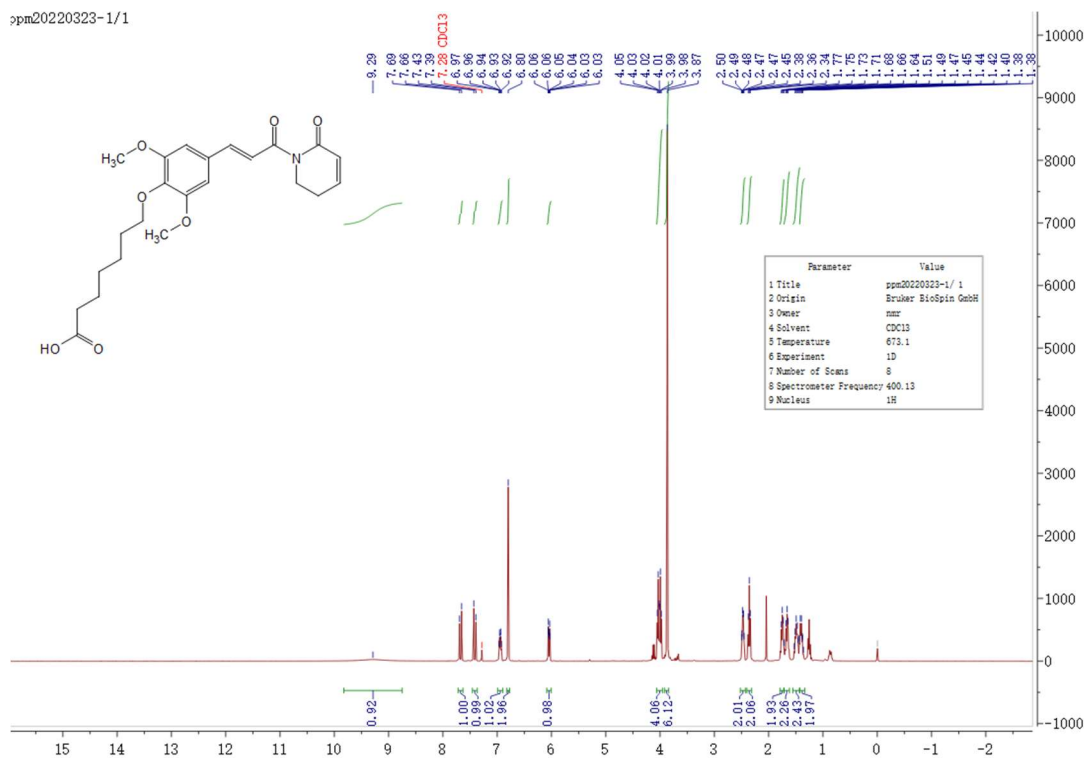

<sup>1</sup>H NMR of (E)-7-(2,6-dimethoxy-4-(3-oxo-3-(6-oxo-3,6-dihydropyridin-1(2H)-yl)prop-1-en-1-yl)phenoxy)heptanoic acid (7)

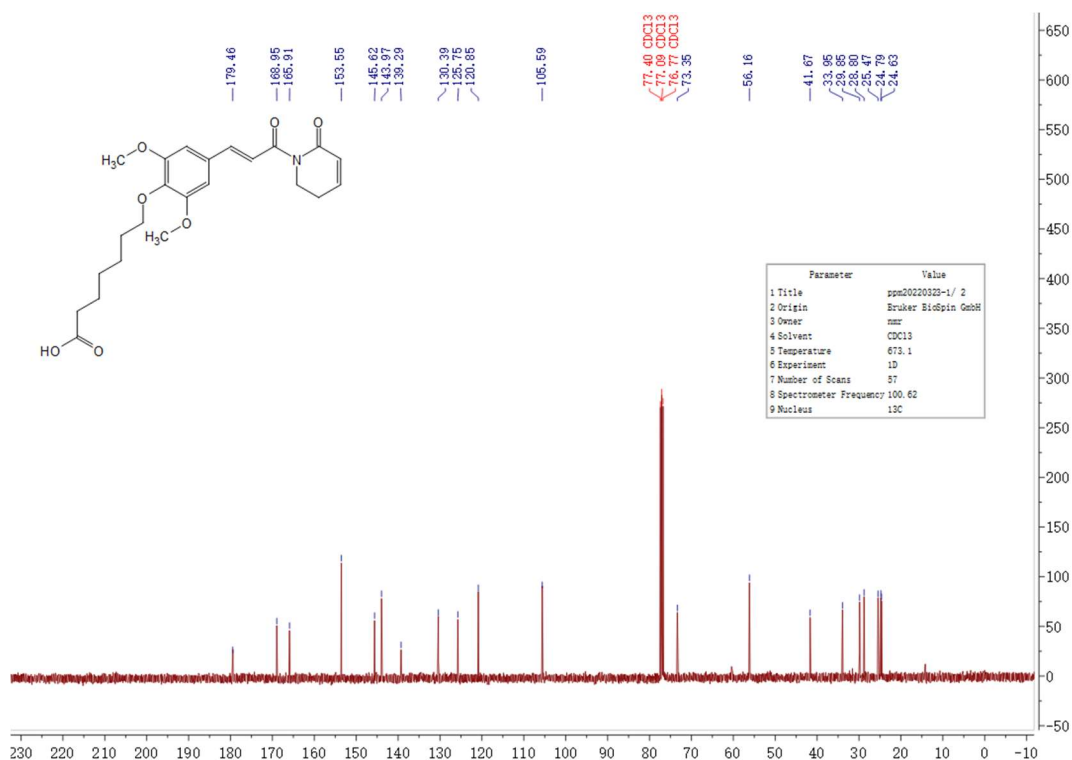

<sup>13</sup>C NMR of (E)-7-(2,6-dimethoxy-4-(3-oxo-3-(6-oxo-3,6-dihydropyridin-1(2H)-yl)prop-1-en-1-yl)phenoxy)heptanoic acid (7)

ppm20211226-1/1

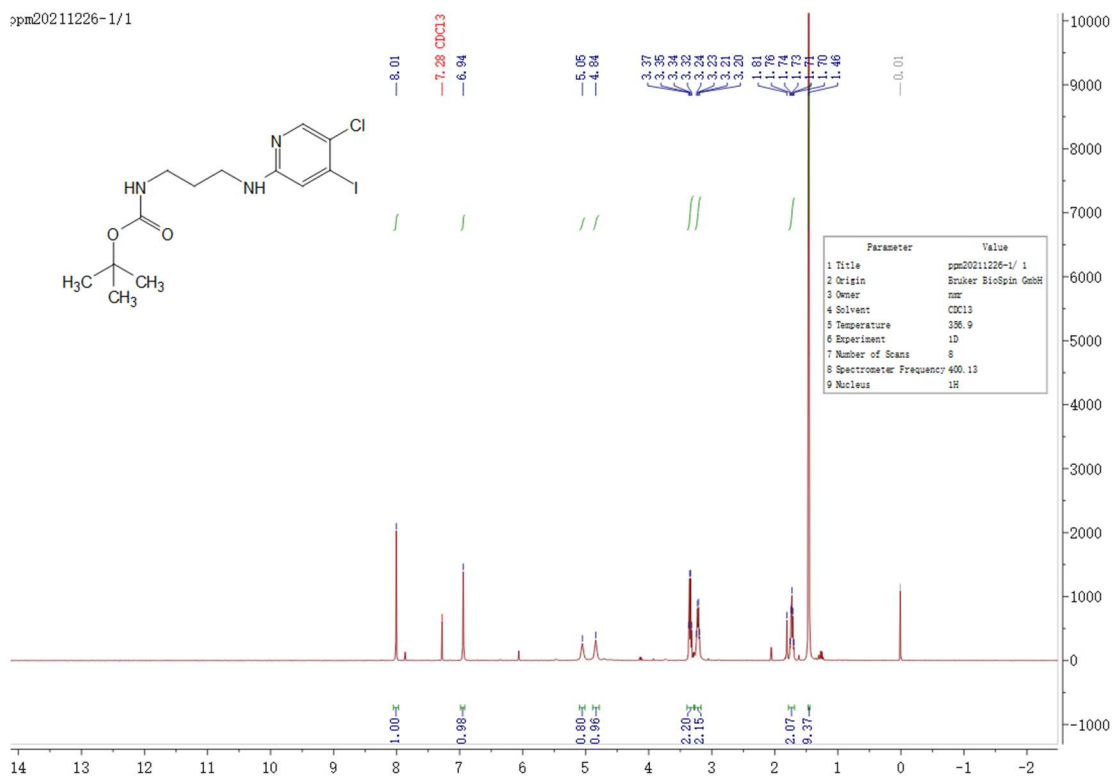

<sup>1</sup>H NMR of tert-butyl (3-((5-chloro-4-iodopyridin-2-yl)amino)propyl)carbamate (9)

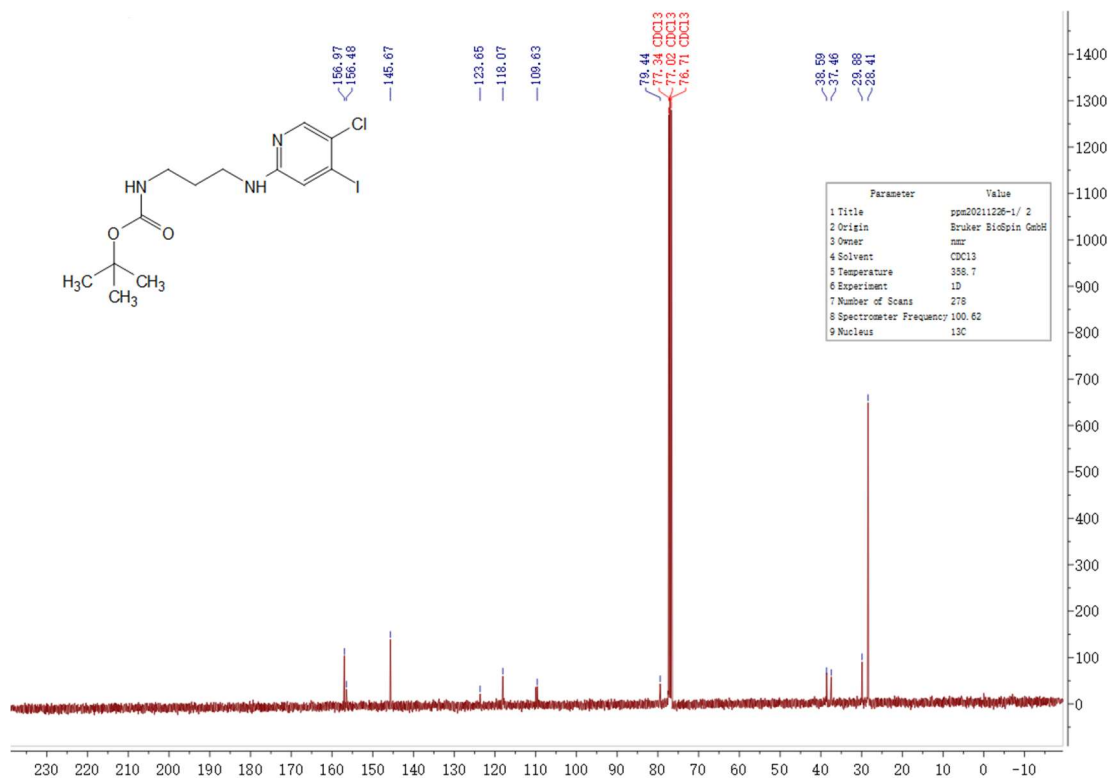

<sup>13</sup>C NMR of of tert-butyl (3-((5-chloro-4-iodopyridin-2-yl)amino)propyl)carbamate (9)

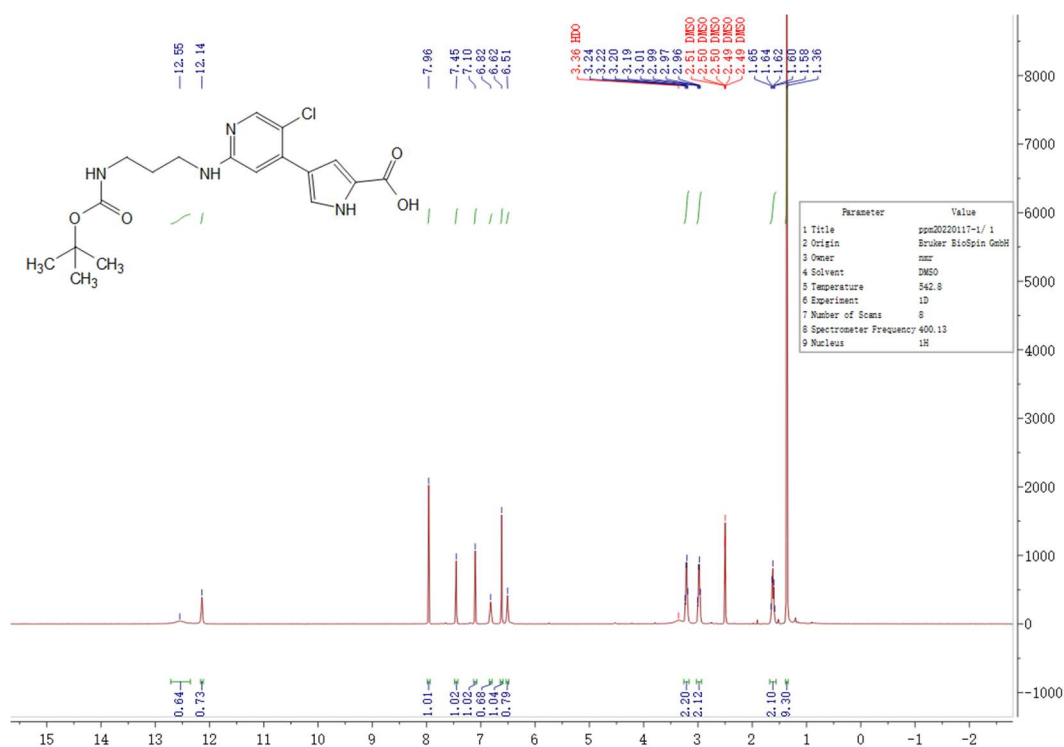

<sup>1</sup>H NMR of 4-(2-((3-((tert-butoxycarbonyl)amino)propyl)amino)-5-chloropyridin-4-yl)-1H-pyrrole-2-carboxylic acid (**14**)

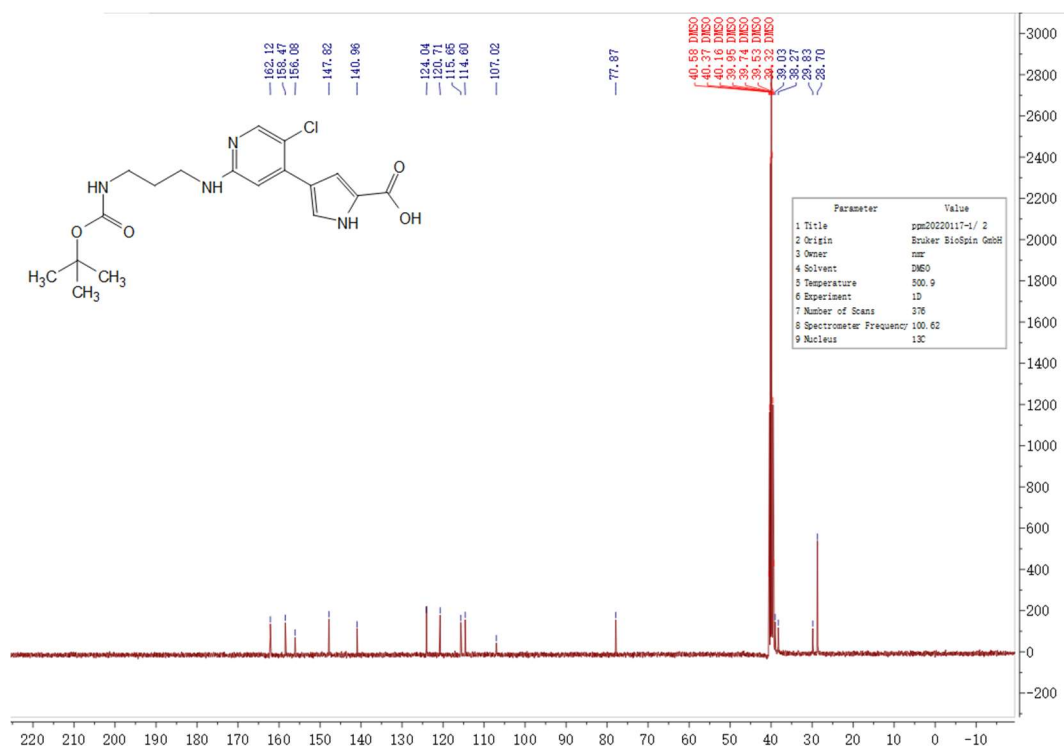

<sup>13</sup>C NMR of 4-(2-((3-((tert-butoxycarbonyl)amino)propyl)amino)-5-chloropyridin-4-yl)-1H-pyrrole-2-carboxylic acid (**14**)

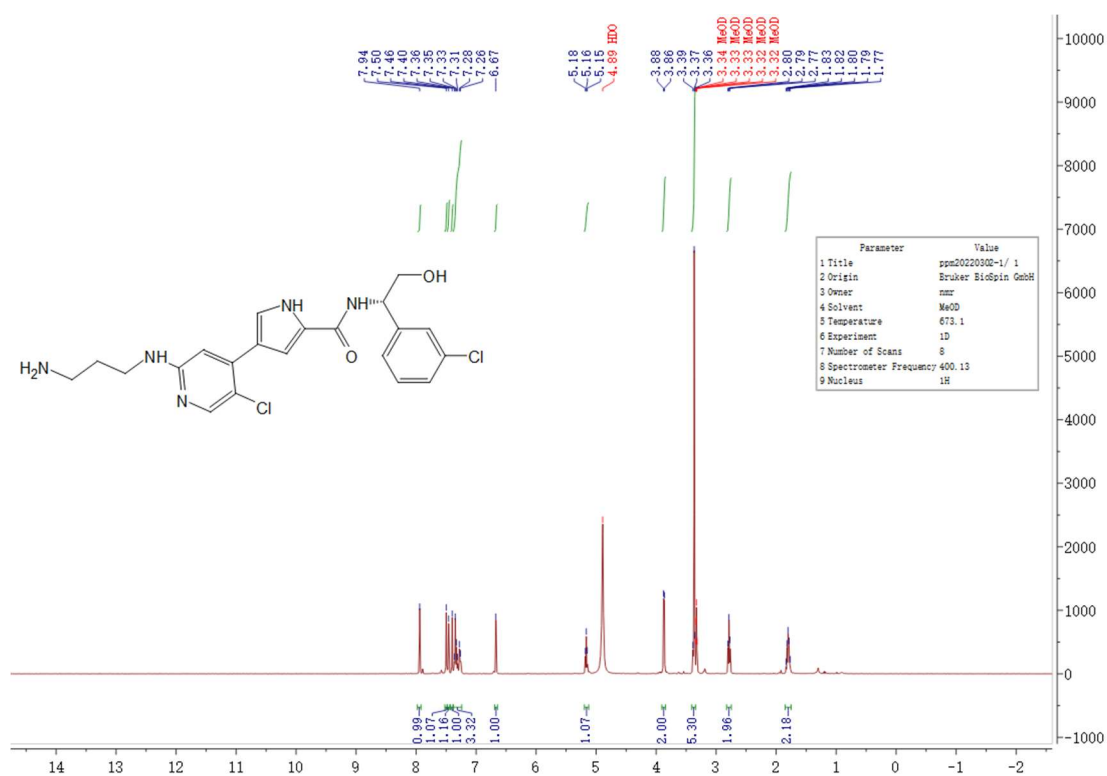

<sup>1</sup>H NMR of A

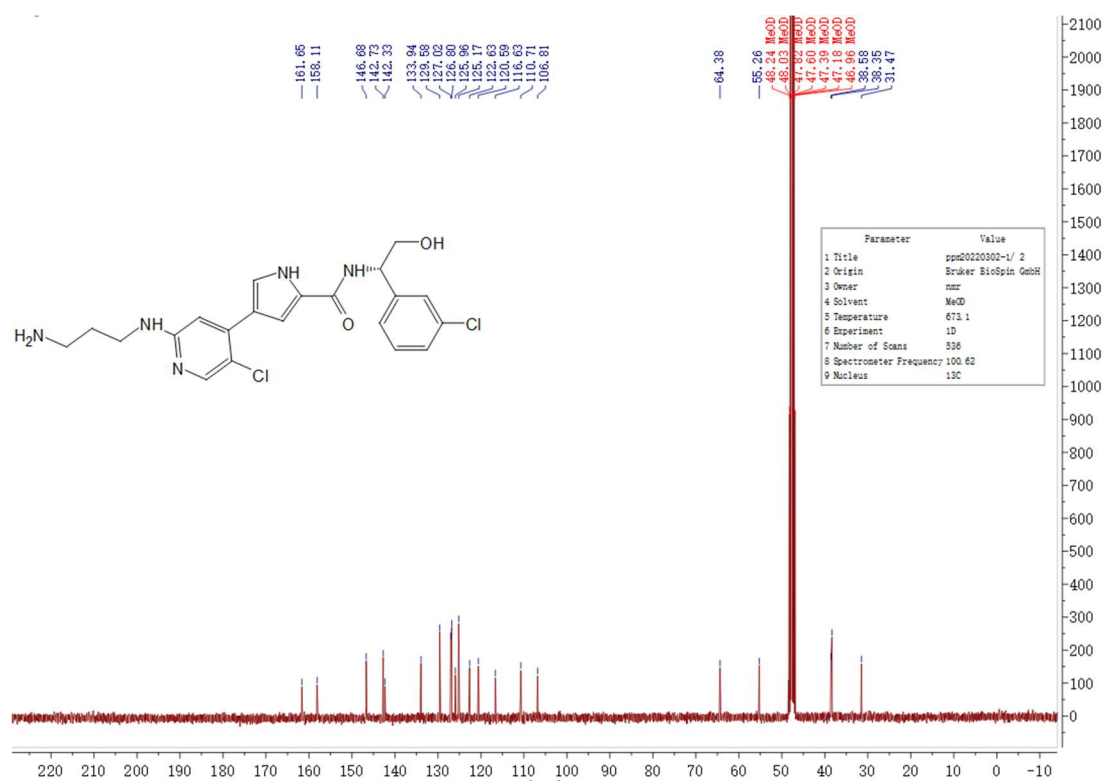

<sup>13</sup>C NMR of A

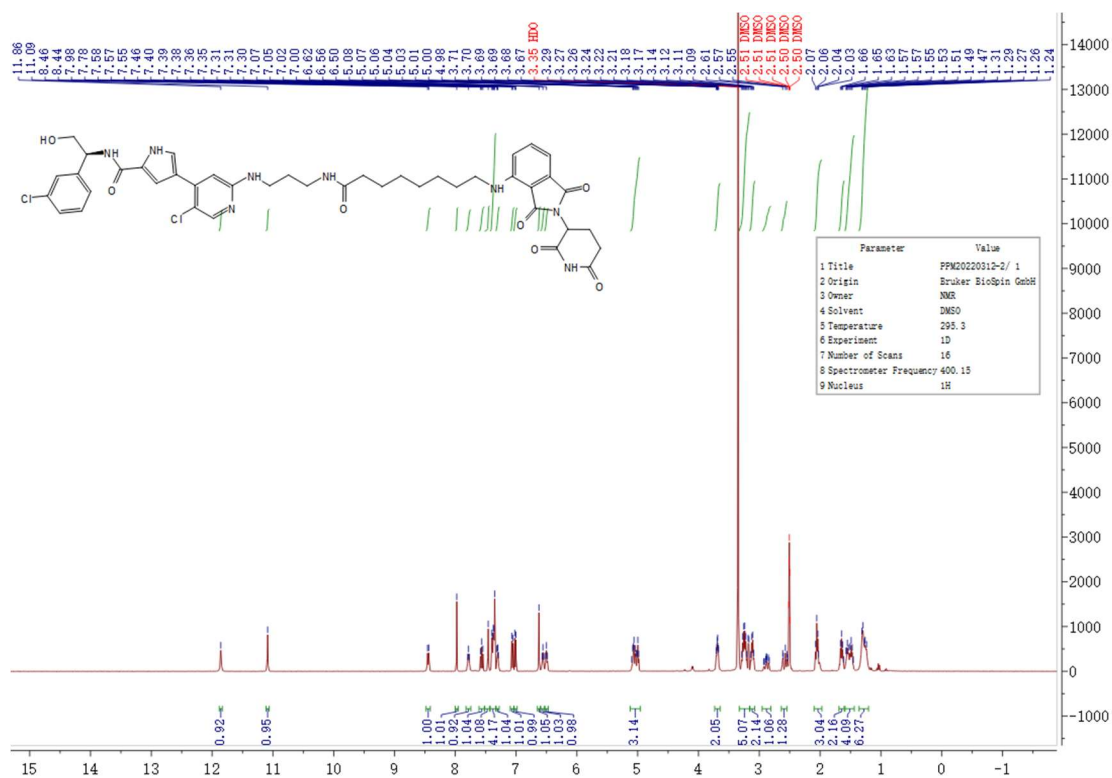

**<sup>1</sup>H NMR of A1**

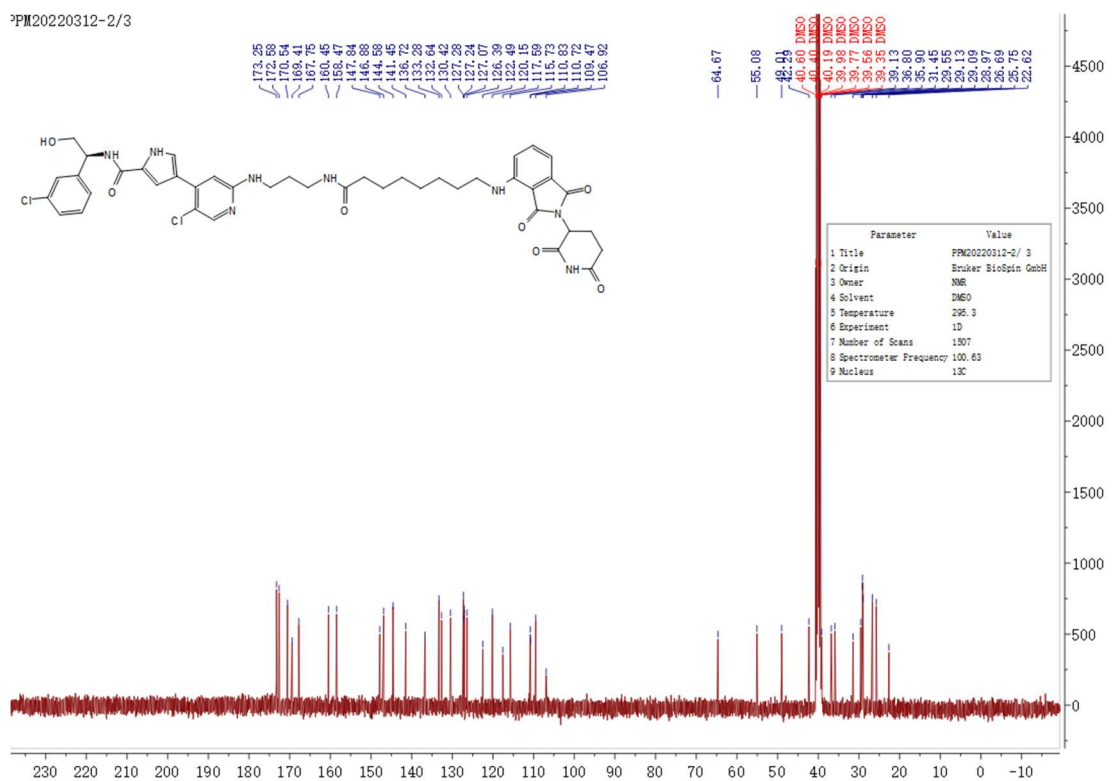

**<sup>13</sup>C NMR of A1**



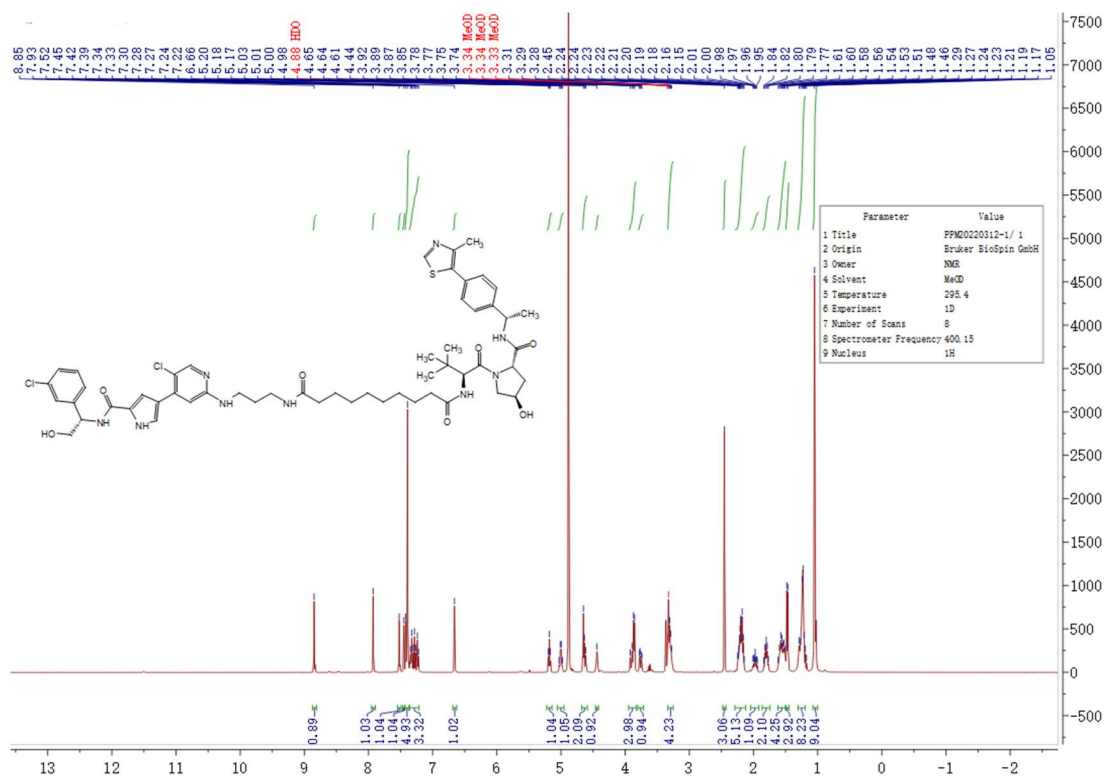

<sup>1</sup>H NMR of A2

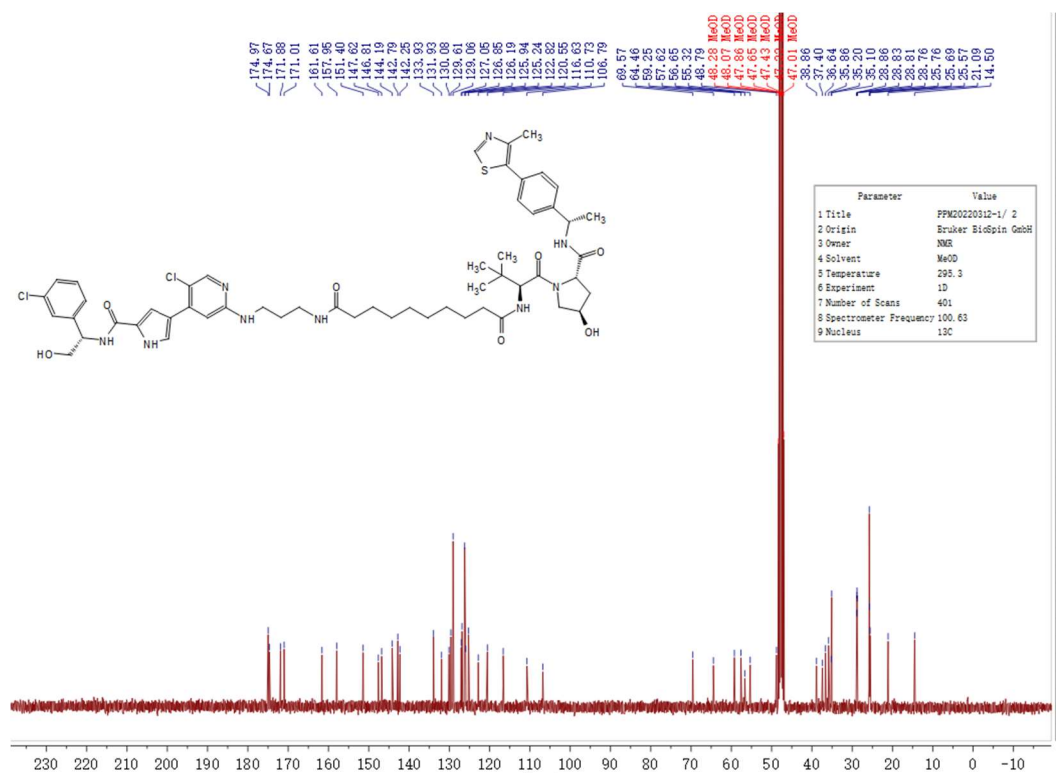

<sup>13</sup>C NMR of A2

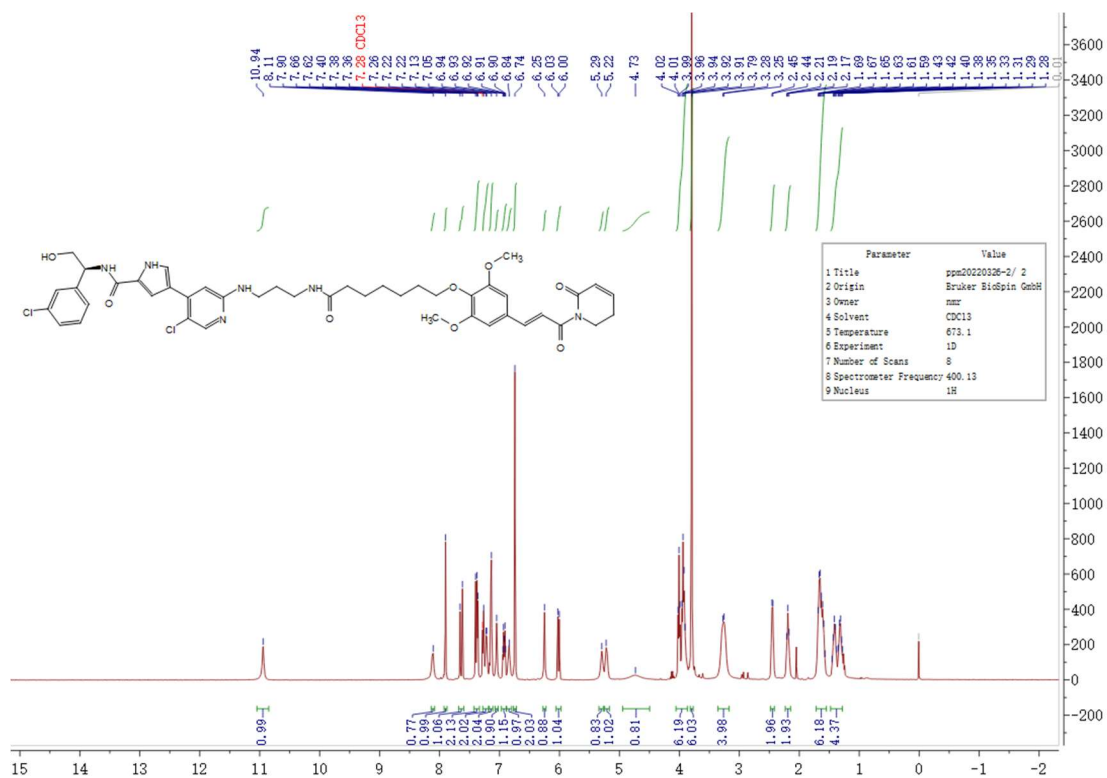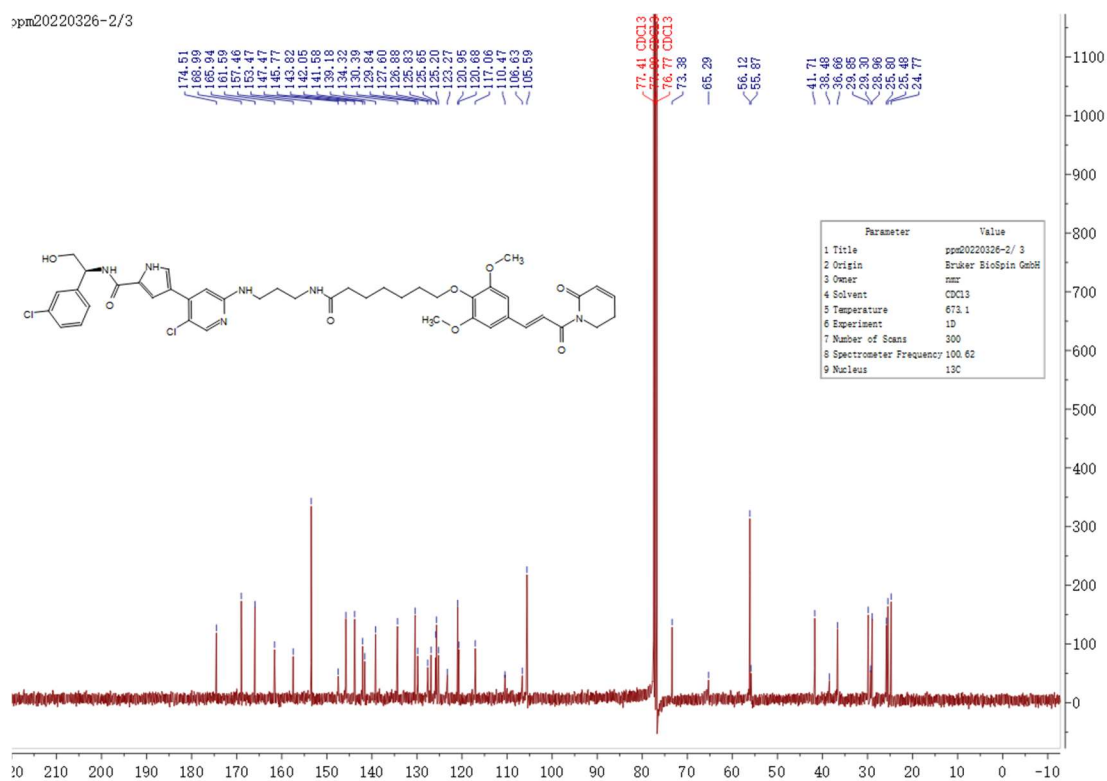

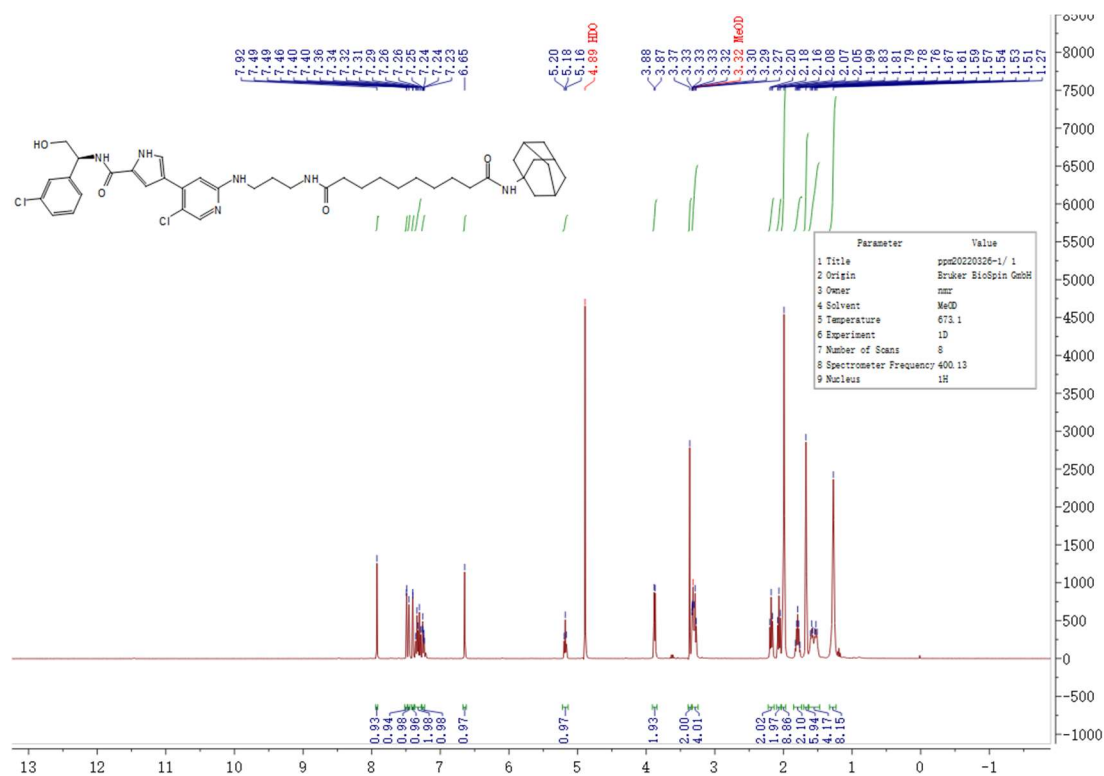

<sup>1</sup>H NMR of A4

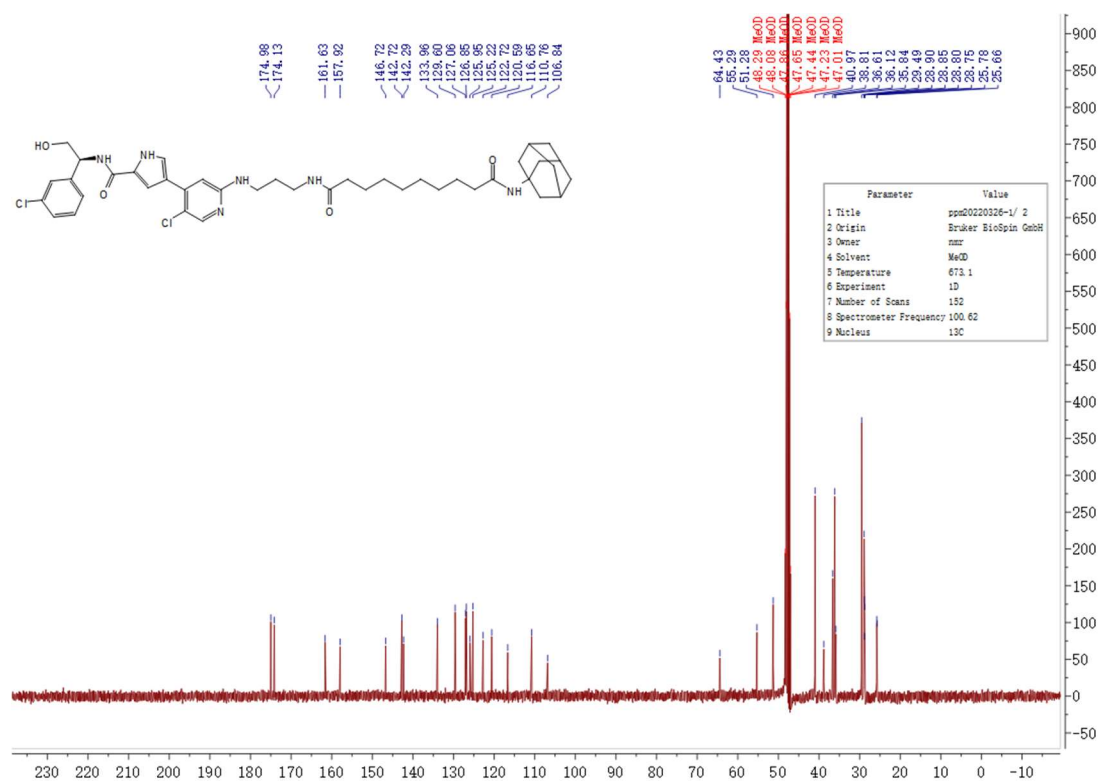

<sup>13</sup>C NMR of A4

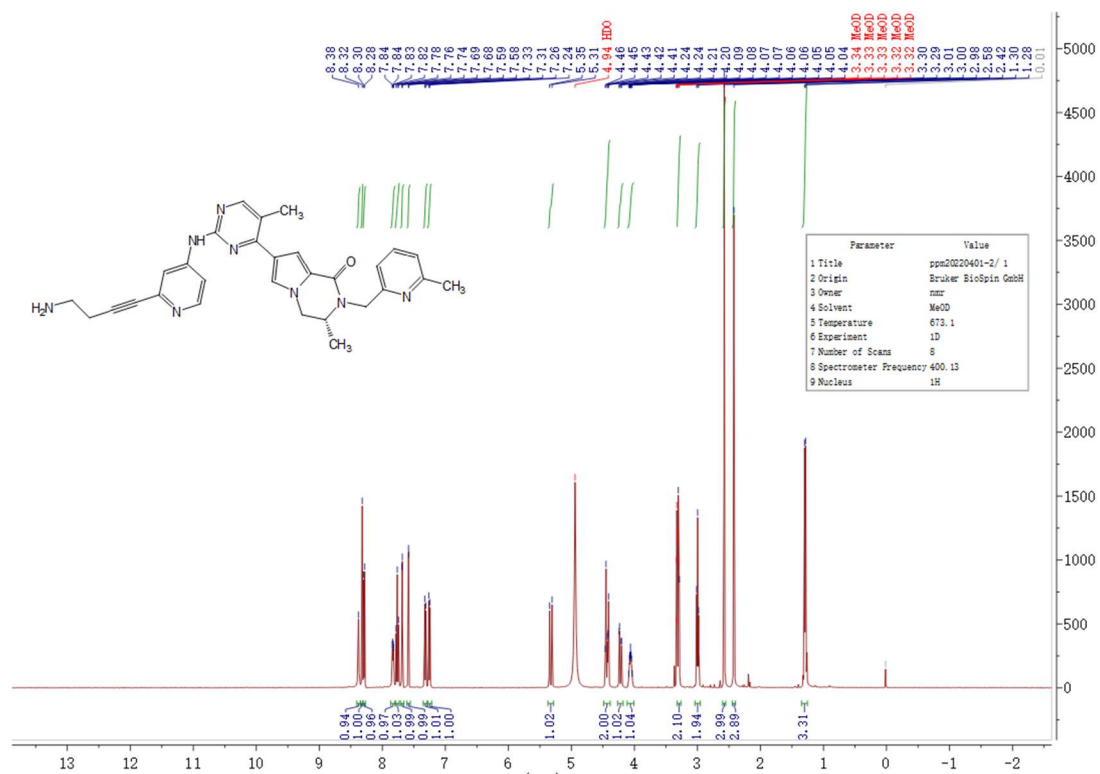

<sup>1</sup>H NMR of B

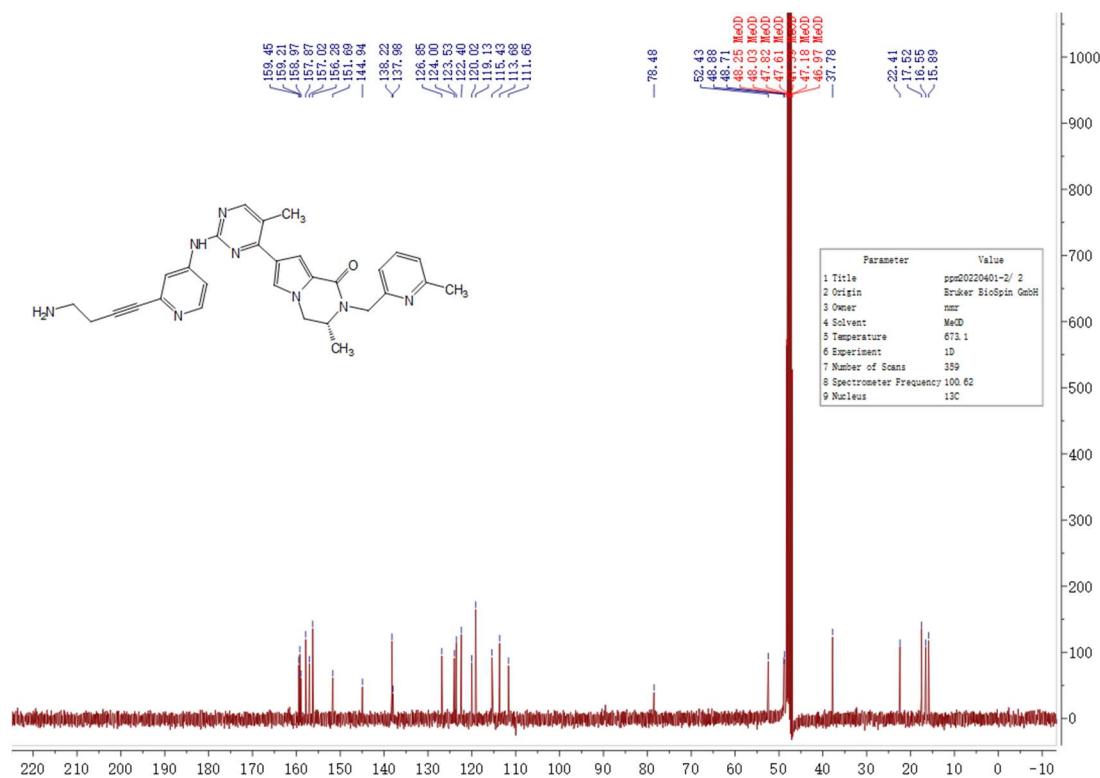

<sup>13</sup>C NMR of B

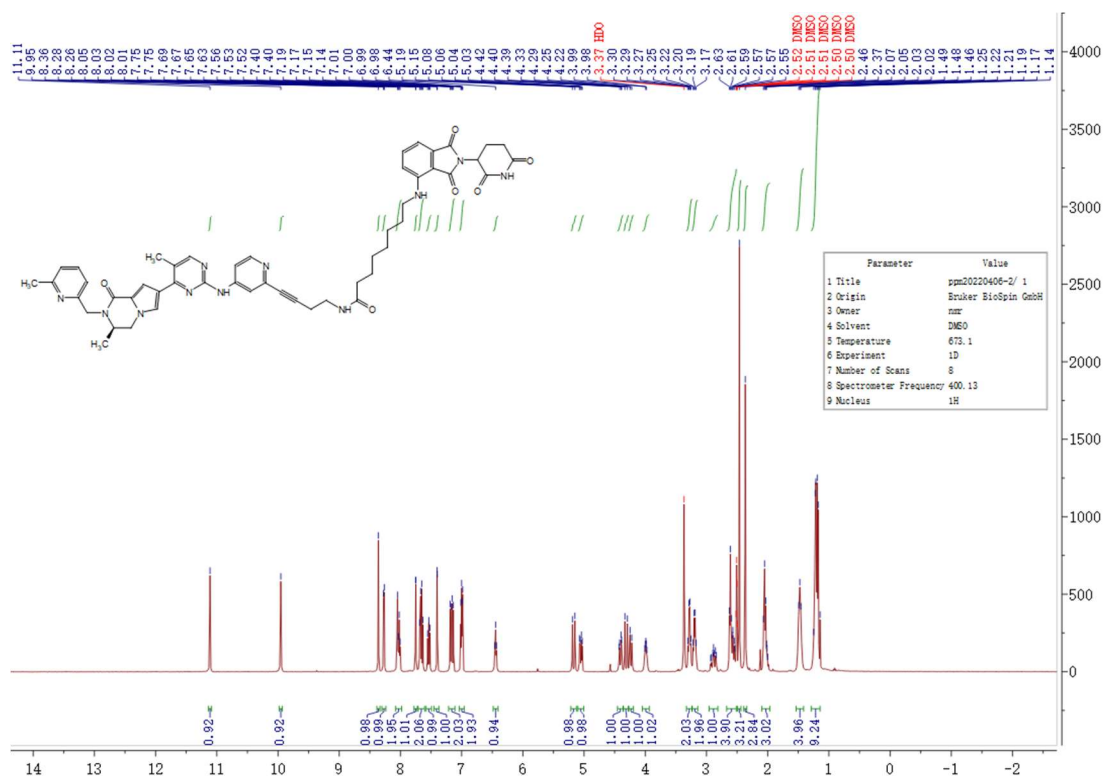

<sup>1</sup>H NMR of B1-8

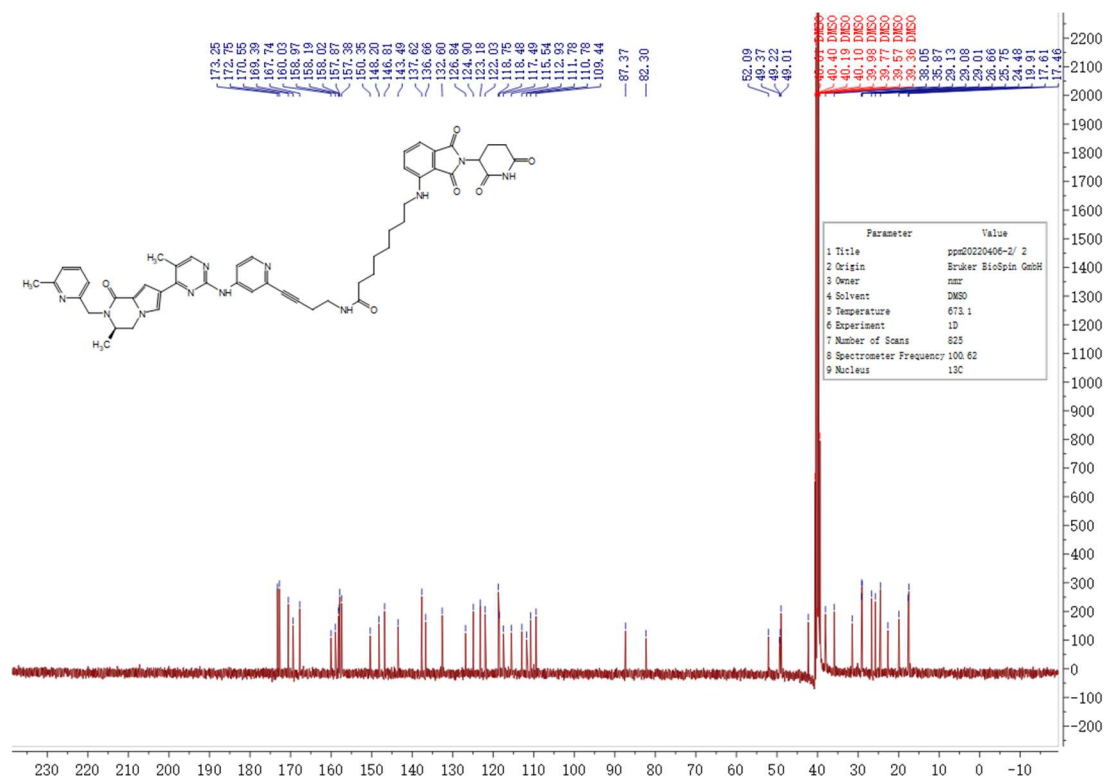

<sup>13</sup>C NMR of B1-8

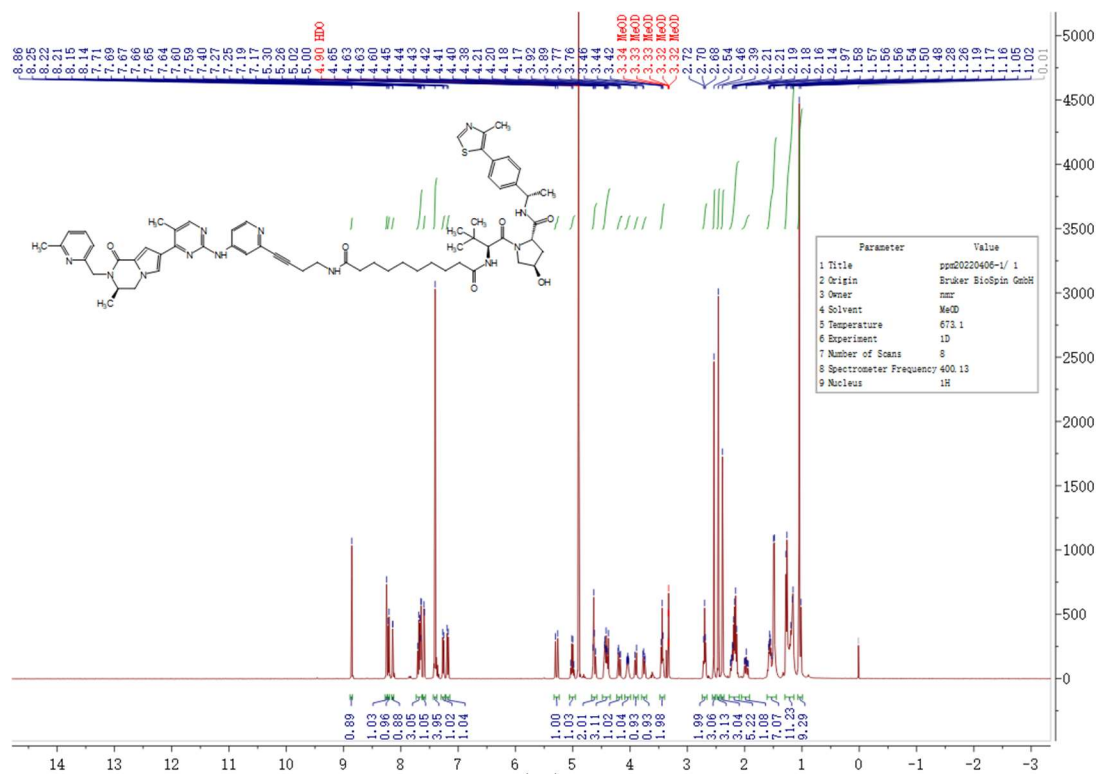

<sup>1</sup>H NMR of B2-10

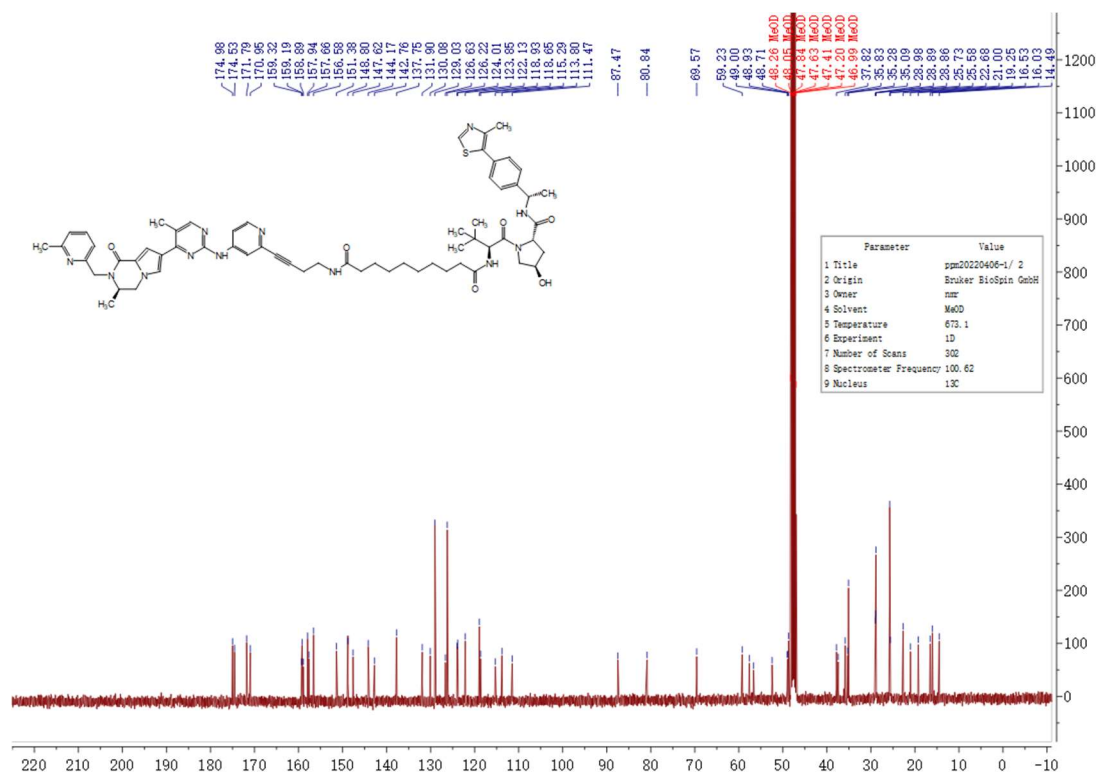

<sup>13</sup>C NMR of B2-10



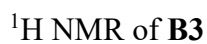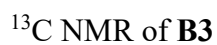

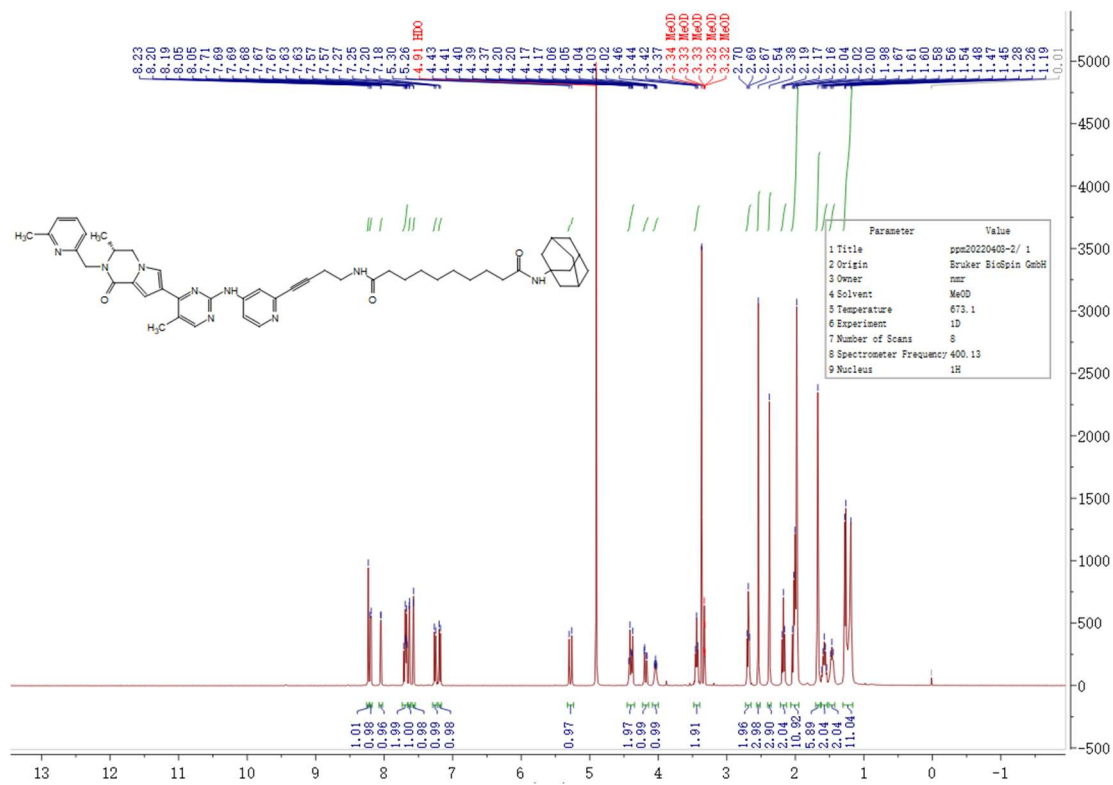

<sup>1</sup>H NMR of B4

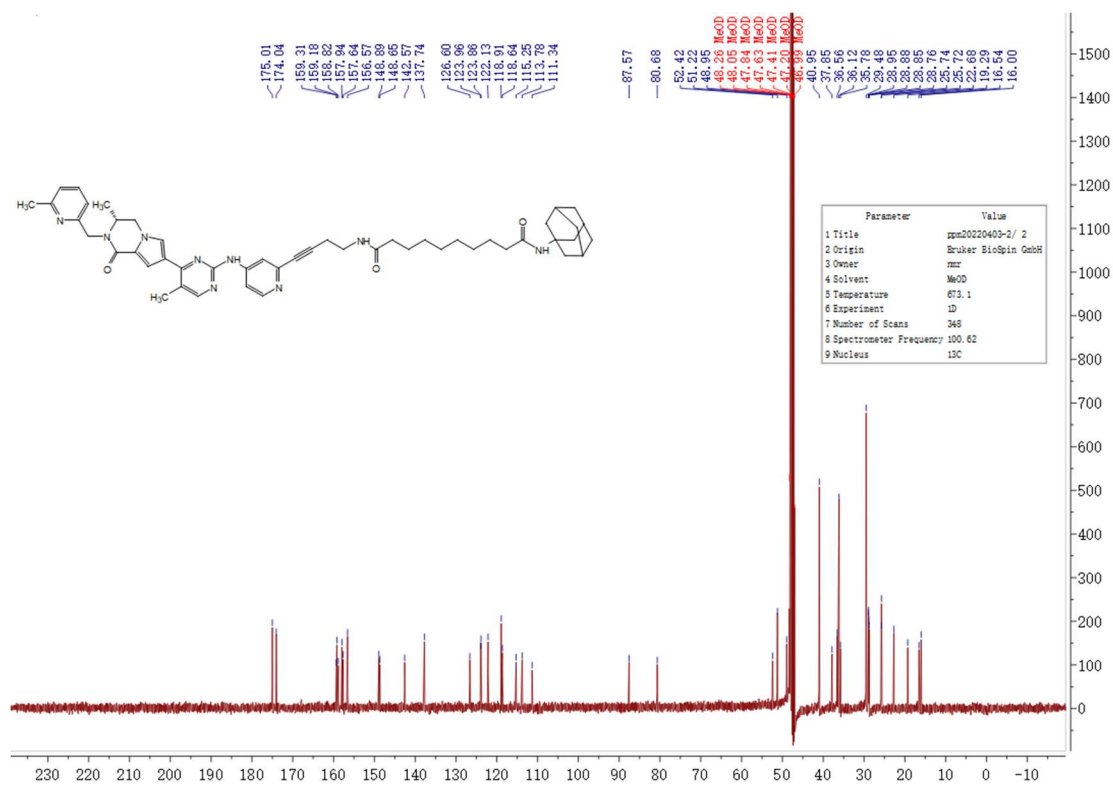

<sup>13</sup>C NMR of B4



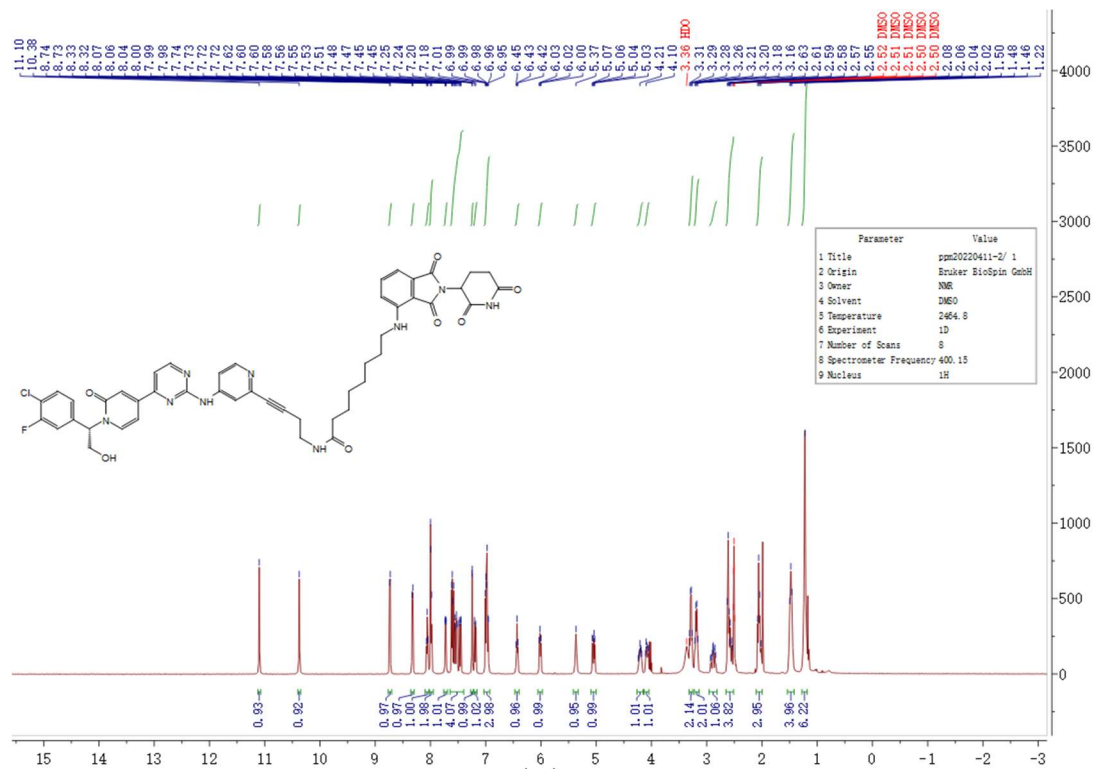

<sup>1</sup>H NMR of C1

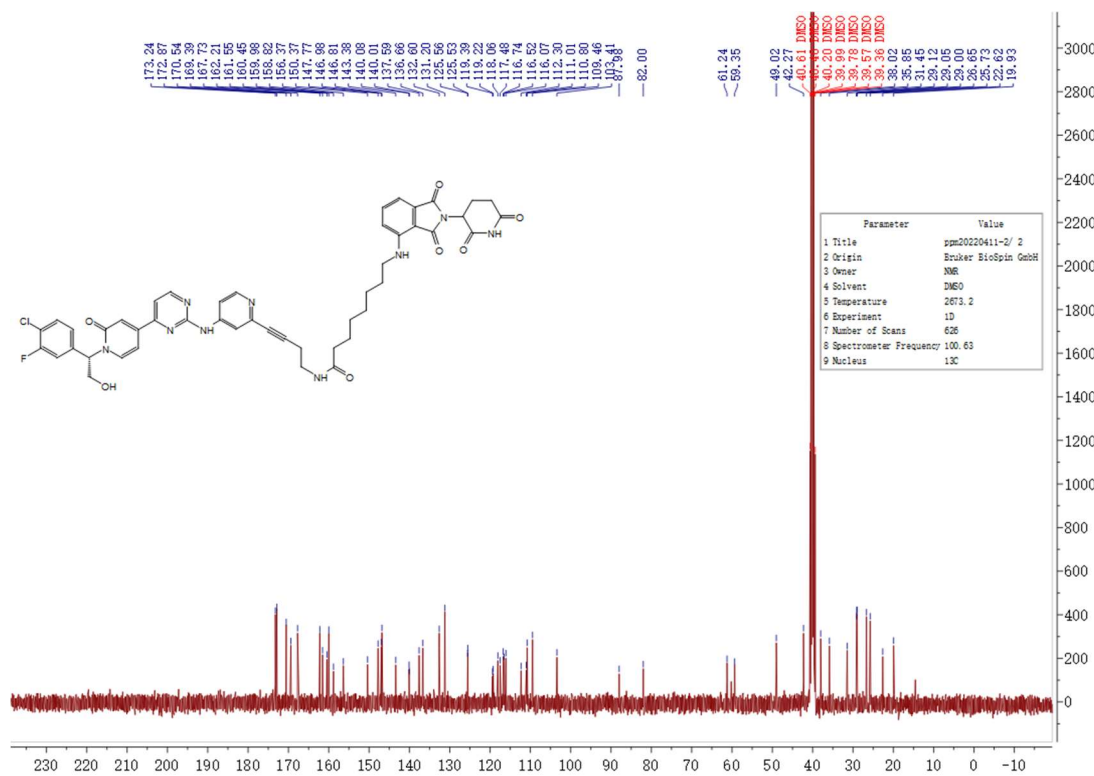

<sup>13</sup>C NMR of C1



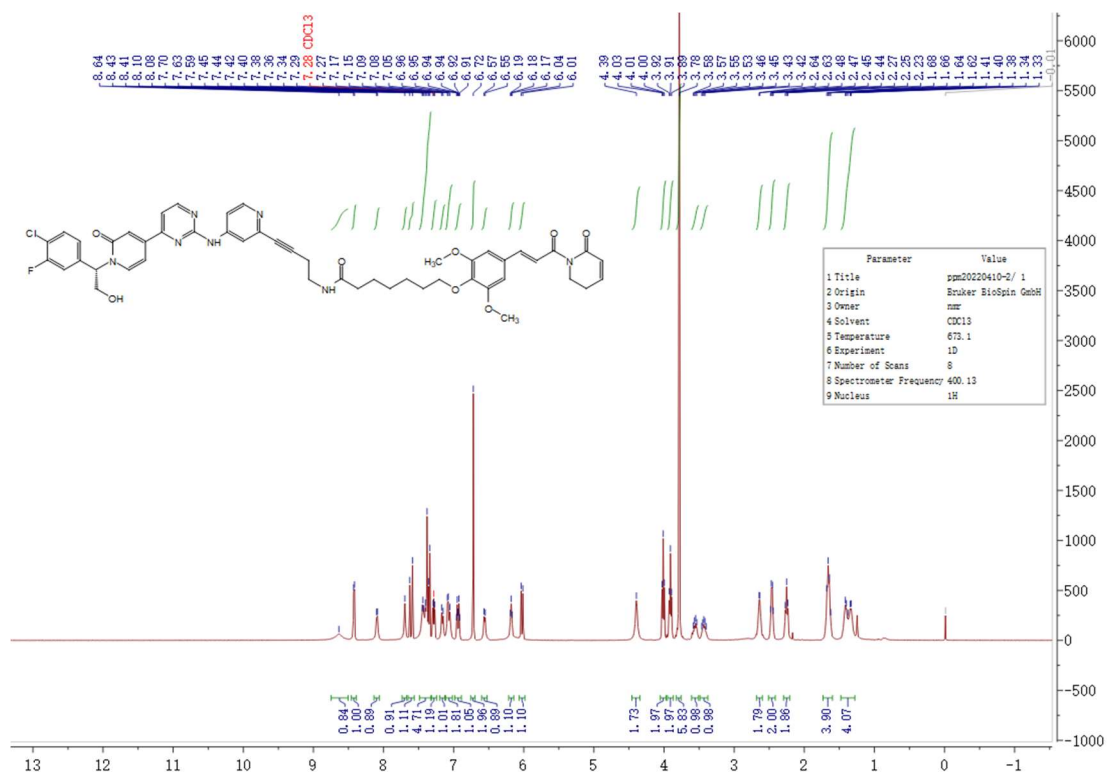

<sup>1</sup>H NMR of C3

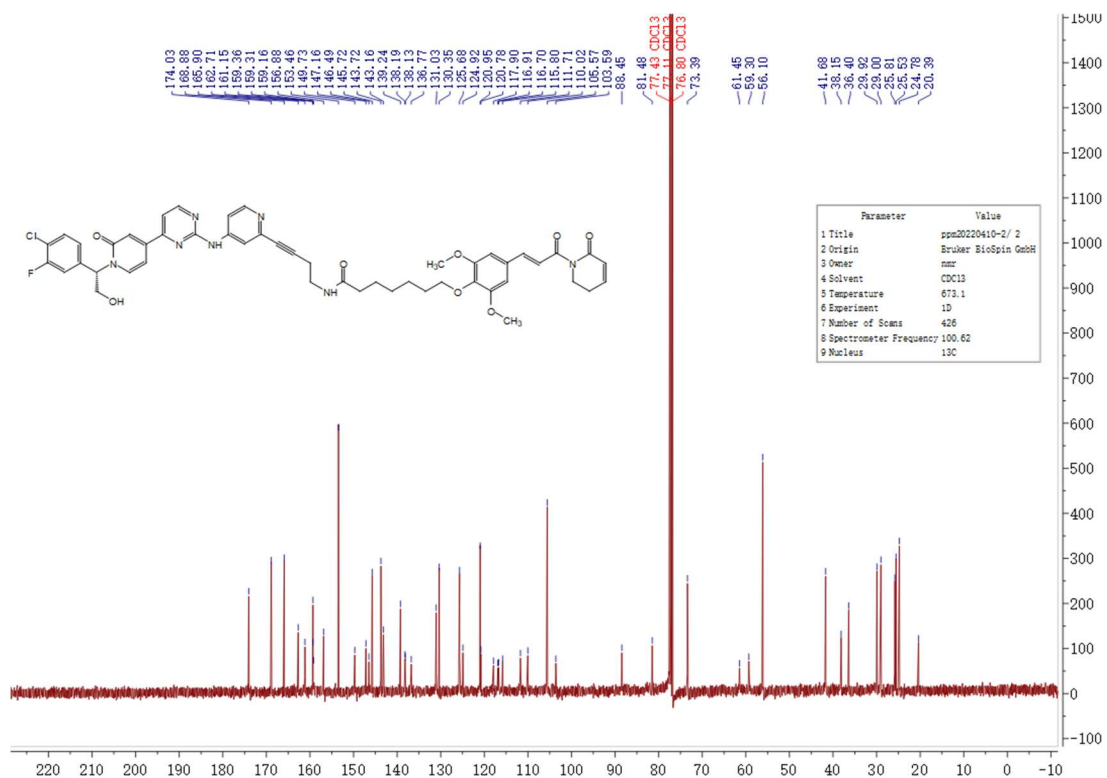

<sup>13</sup>C NMR of C3

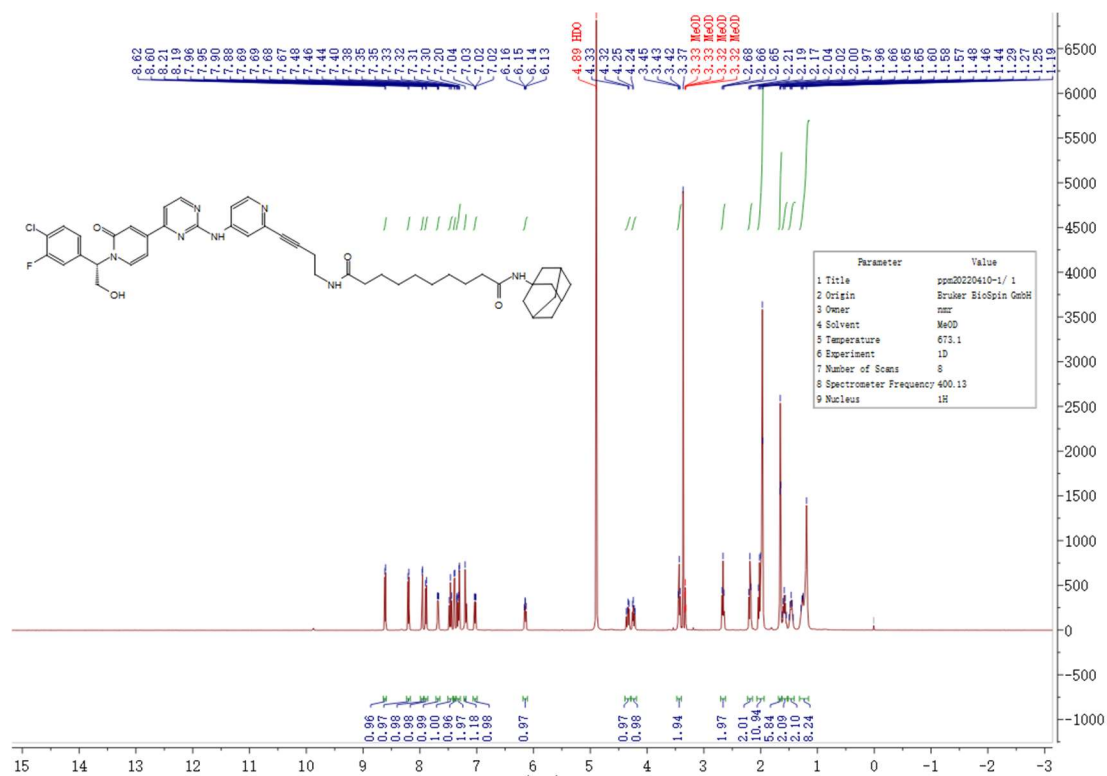

<sup>1</sup>H NMR of C4

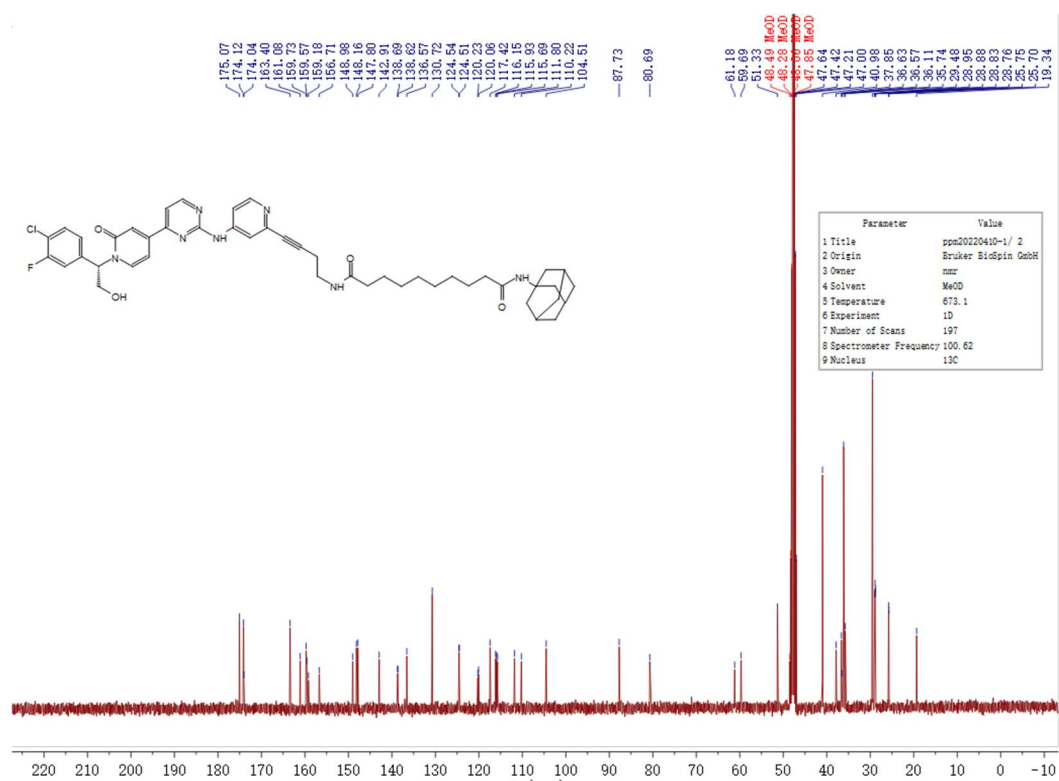

<sup>13</sup>C NMR of C4

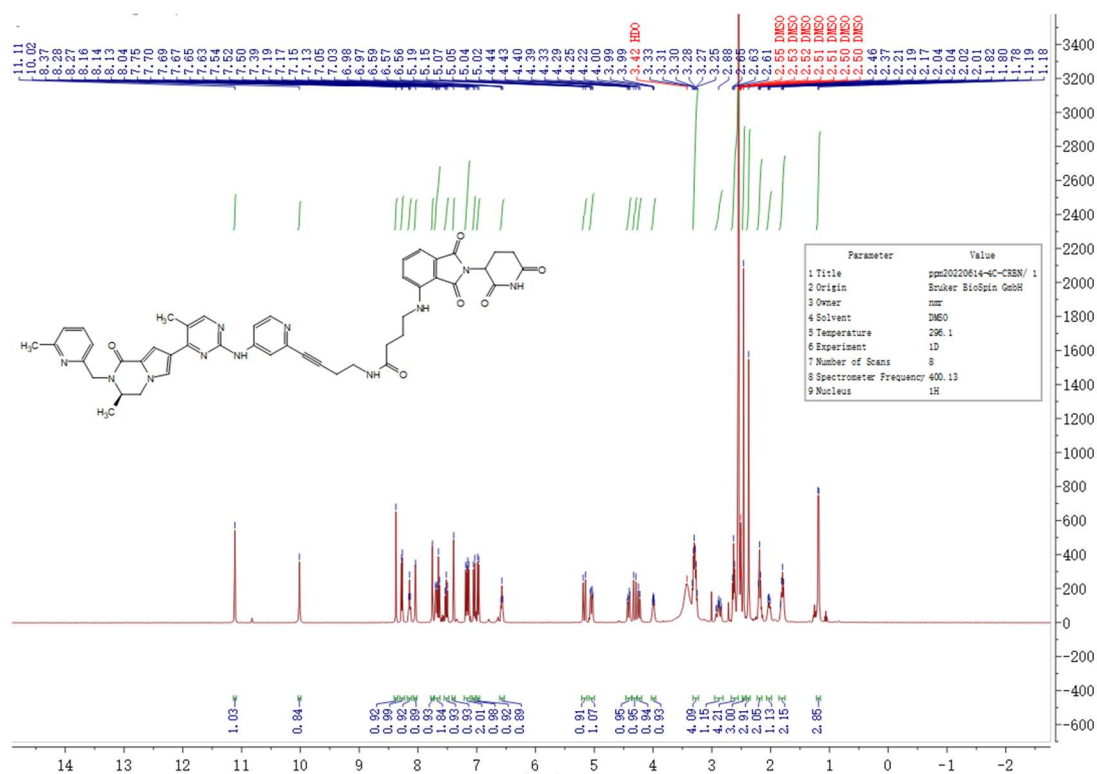

**<sup>1</sup>H NMR of B1-4**

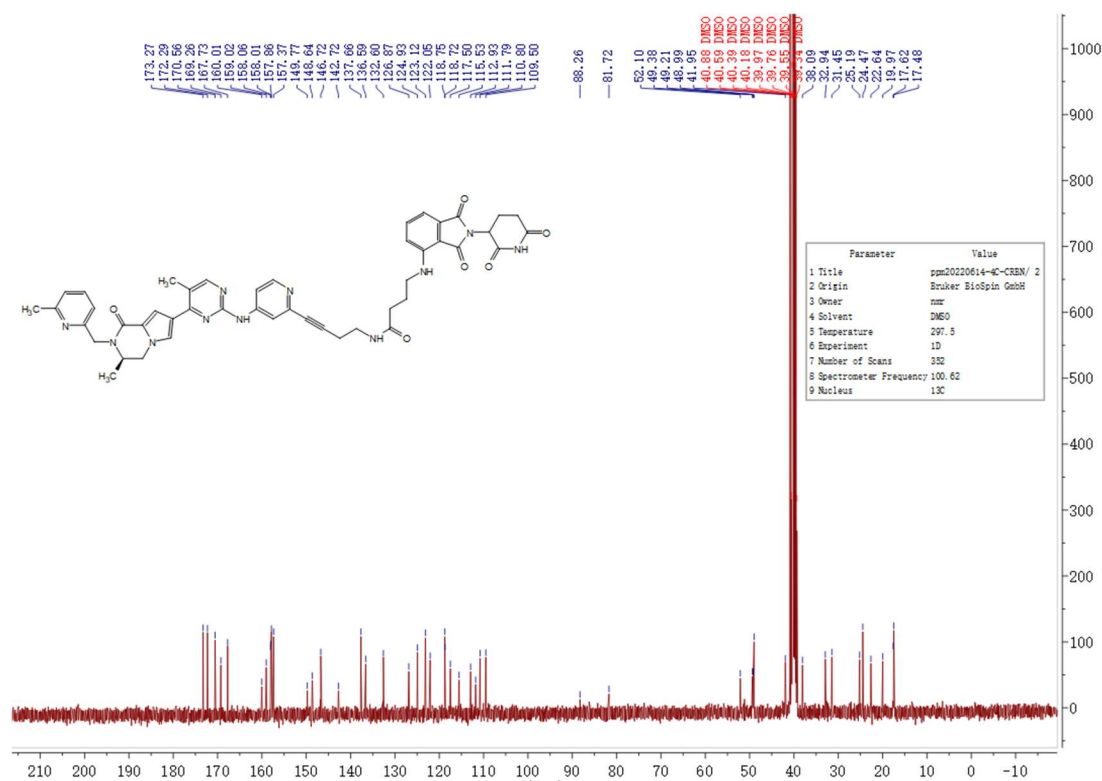

**<sup>13</sup>C NMR of B1-4**

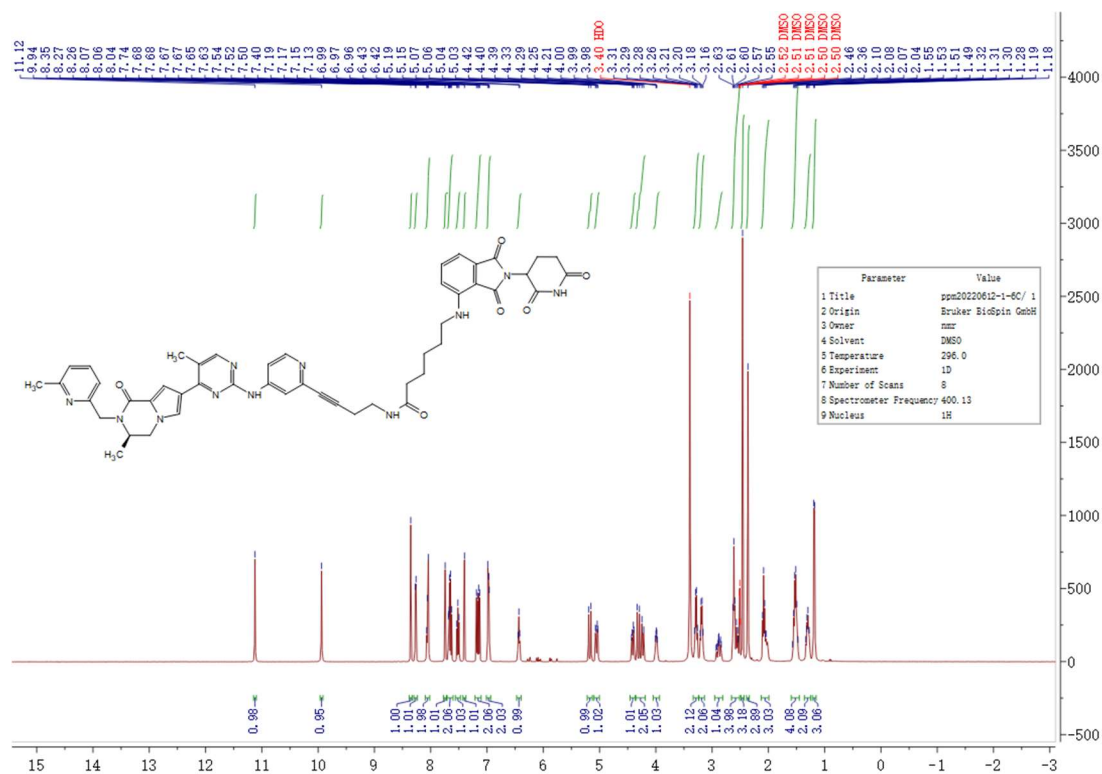

**<sup>1</sup>H NMR of B1-6**

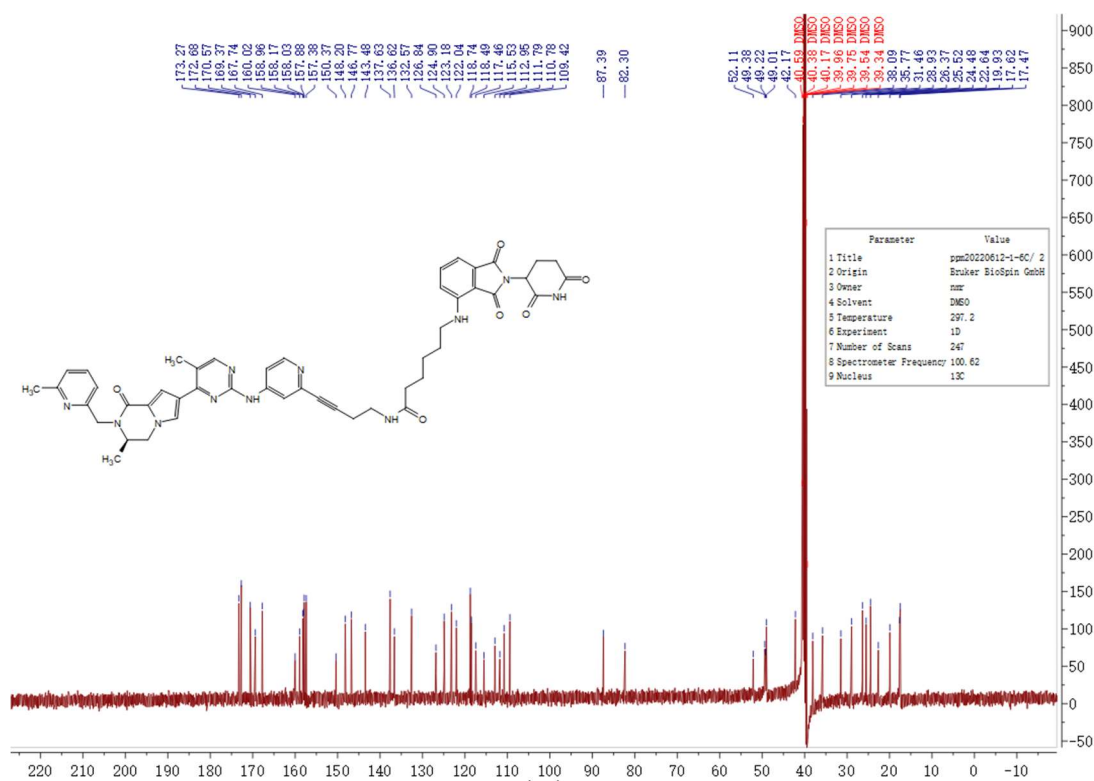

**<sup>13</sup>C NMR of B1-6**



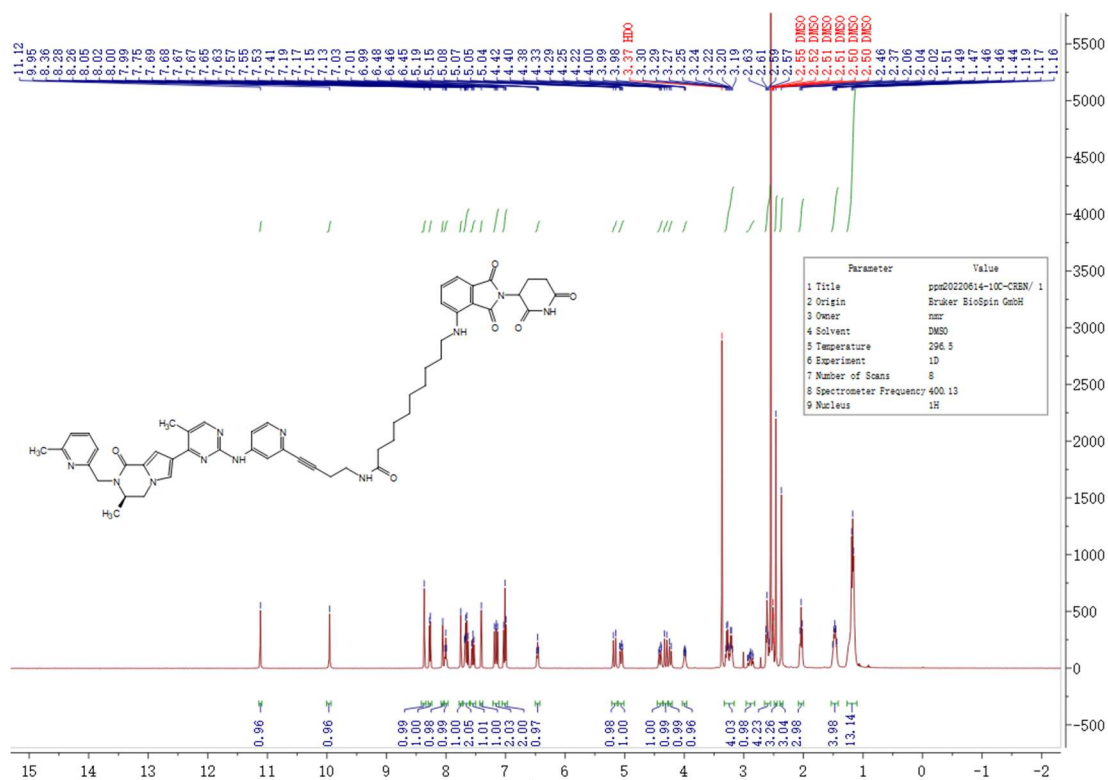

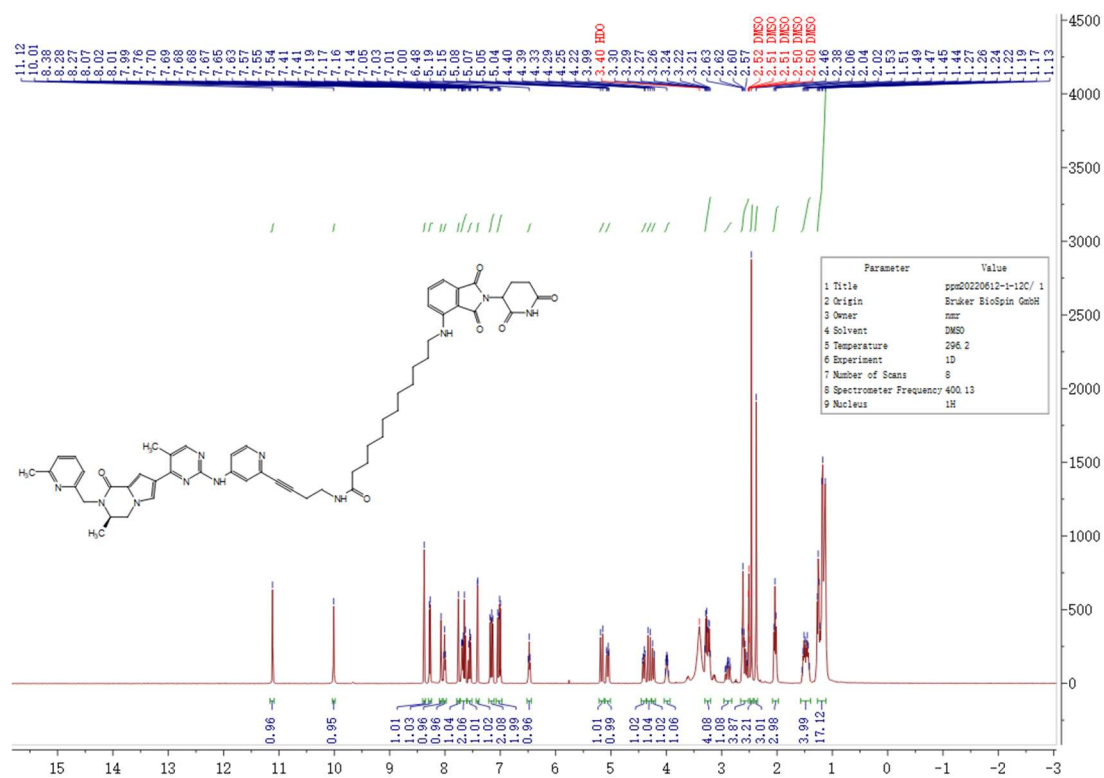

<sup>1</sup>H NMR of B1-12

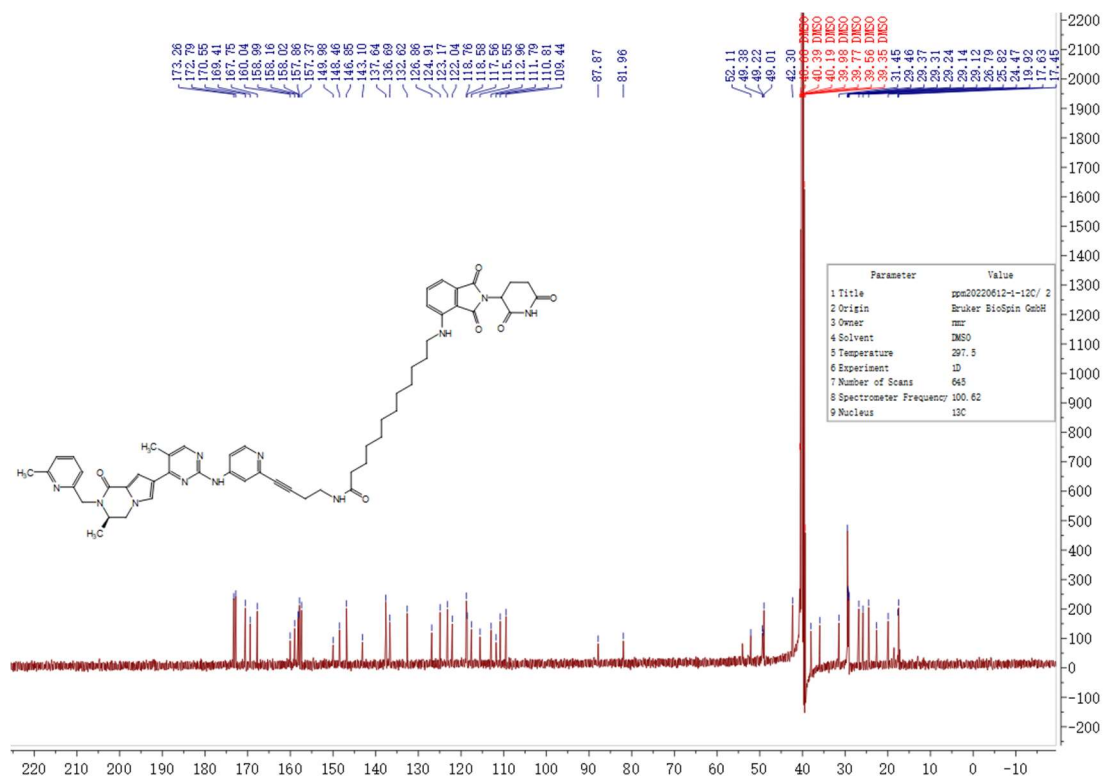

<sup>13</sup>C NMR of B1-12



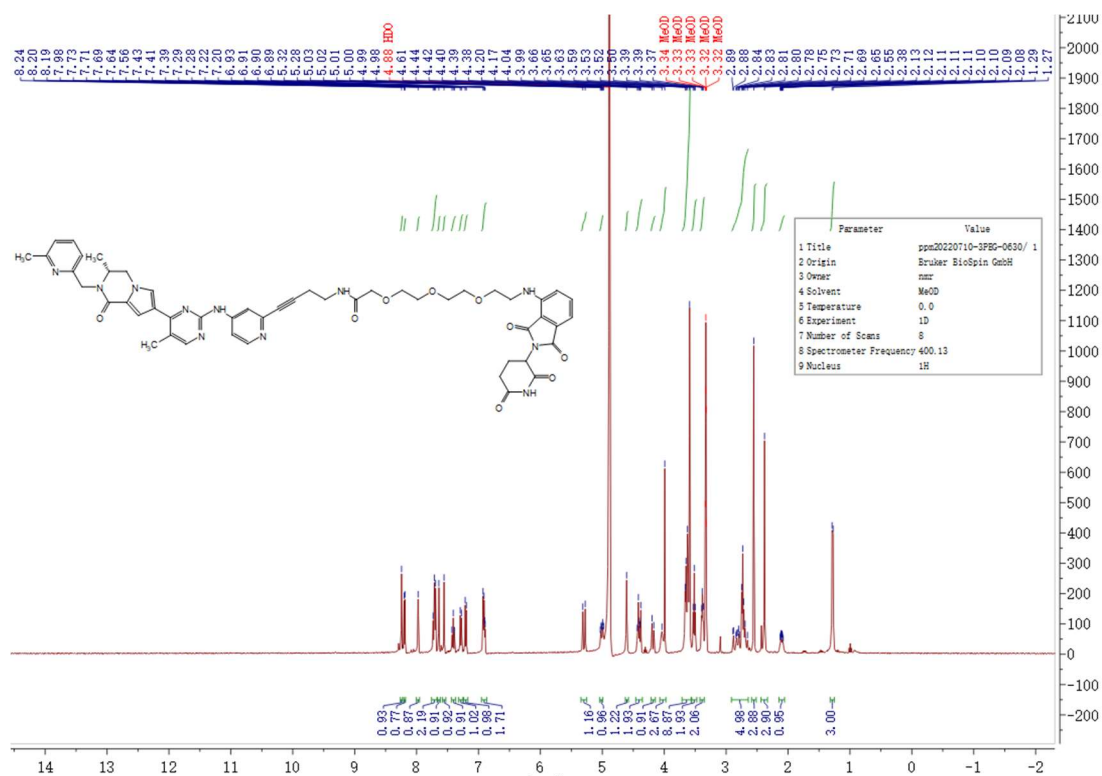

**<sup>1</sup>H NMR of B1-3P**

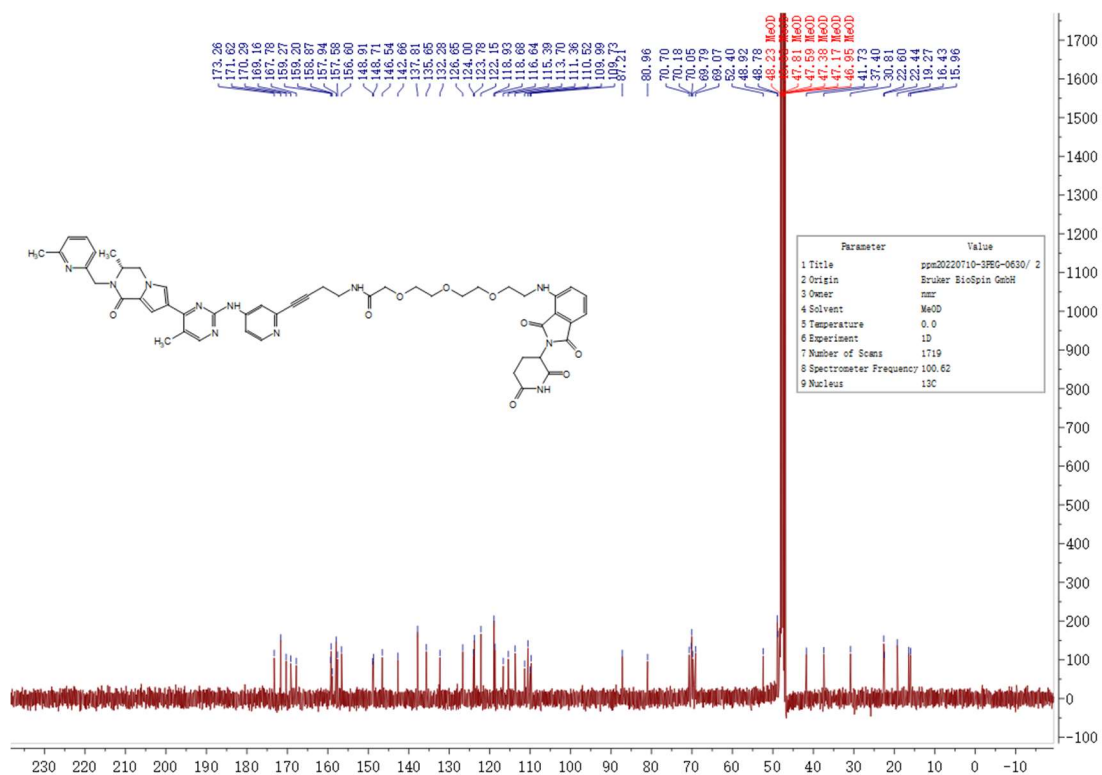

**<sup>13</sup>C NMR of B1-3P**

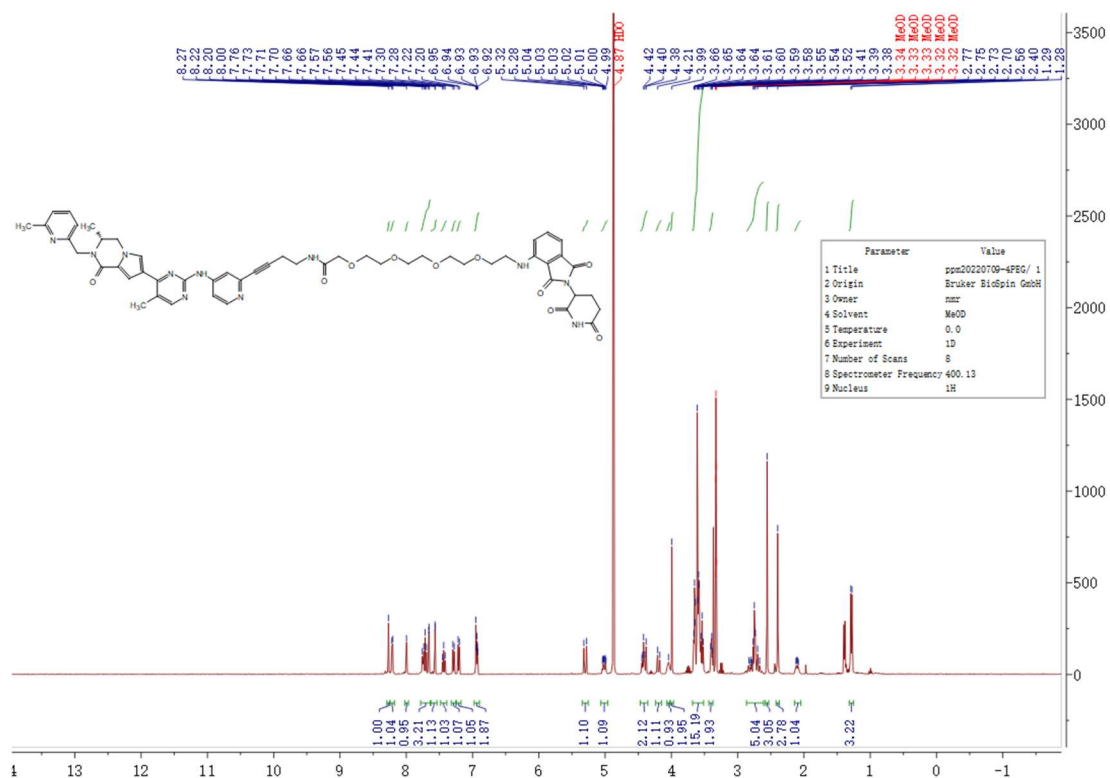

$^1\text{H}$  NMR of B1-4P

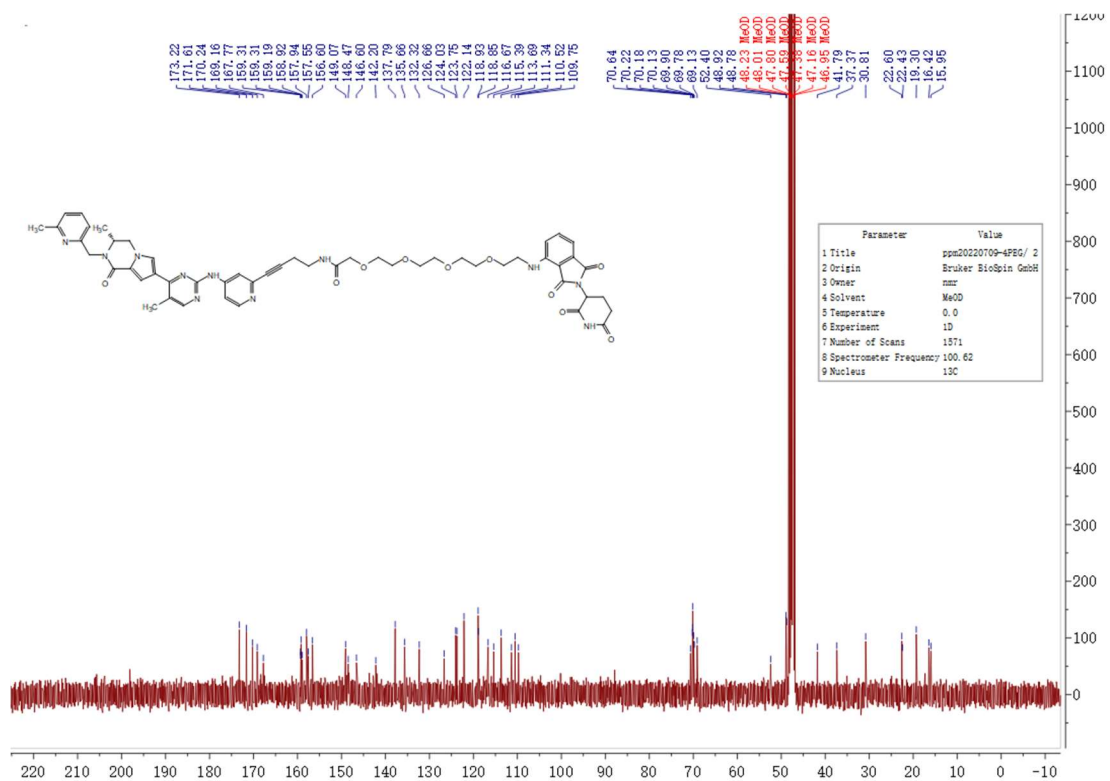

$^{13}\text{C}$  NMR of B1-4P

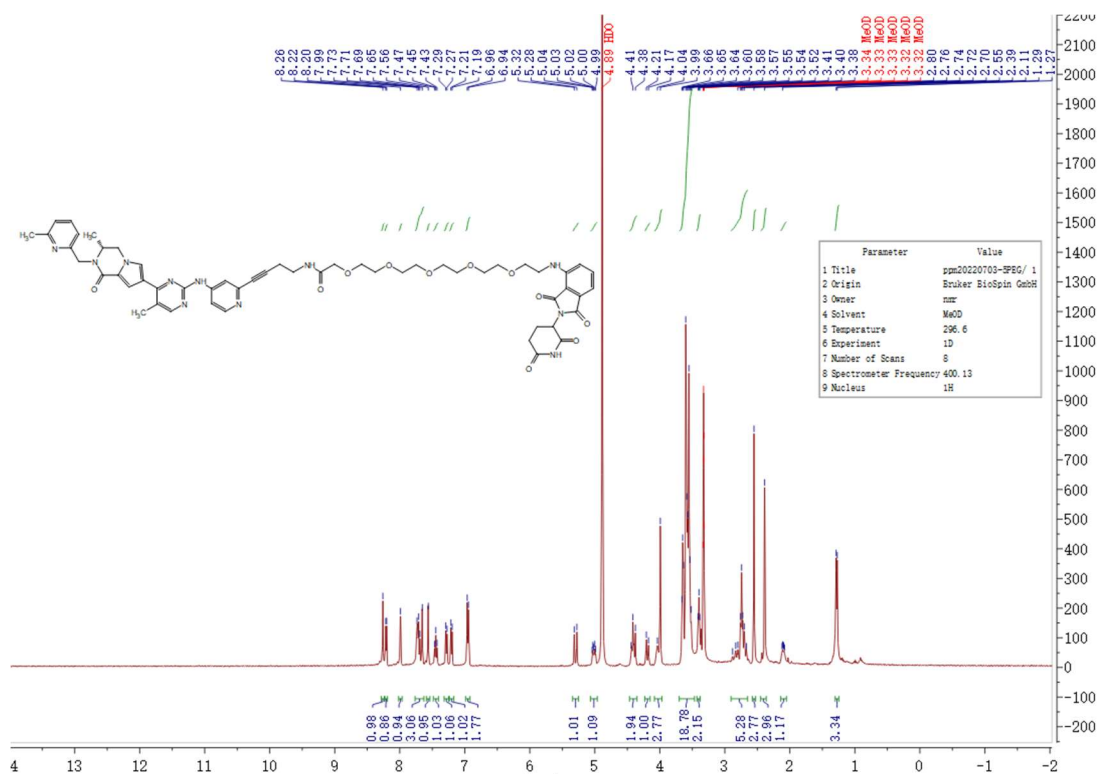

**<sup>1</sup>H NMR of B1-5P**

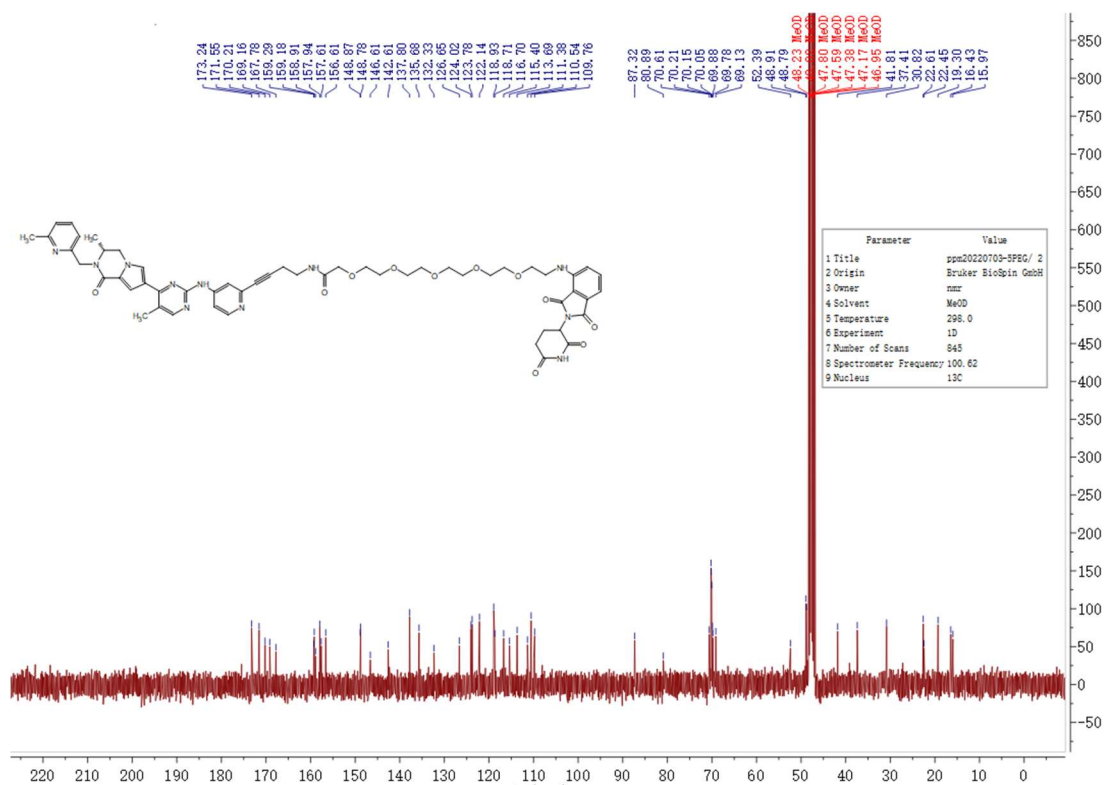

**<sup>13</sup>C NMR of B1-5P**

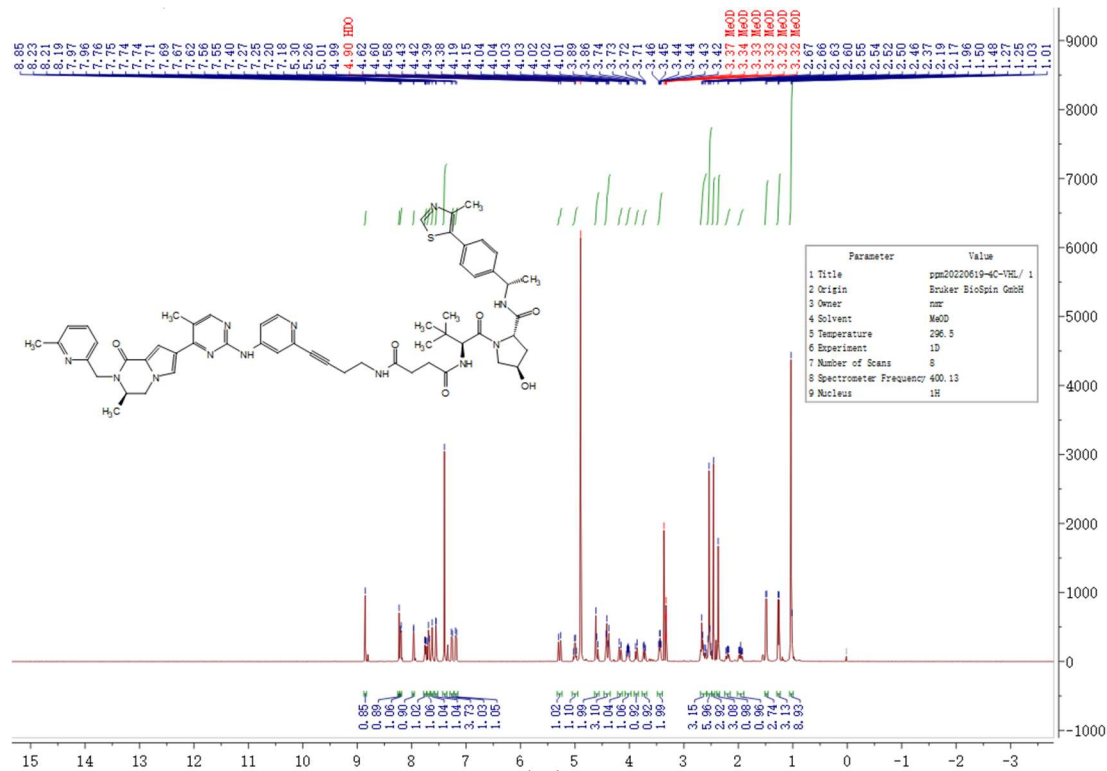

<sup>1</sup>H NMR of B2-4

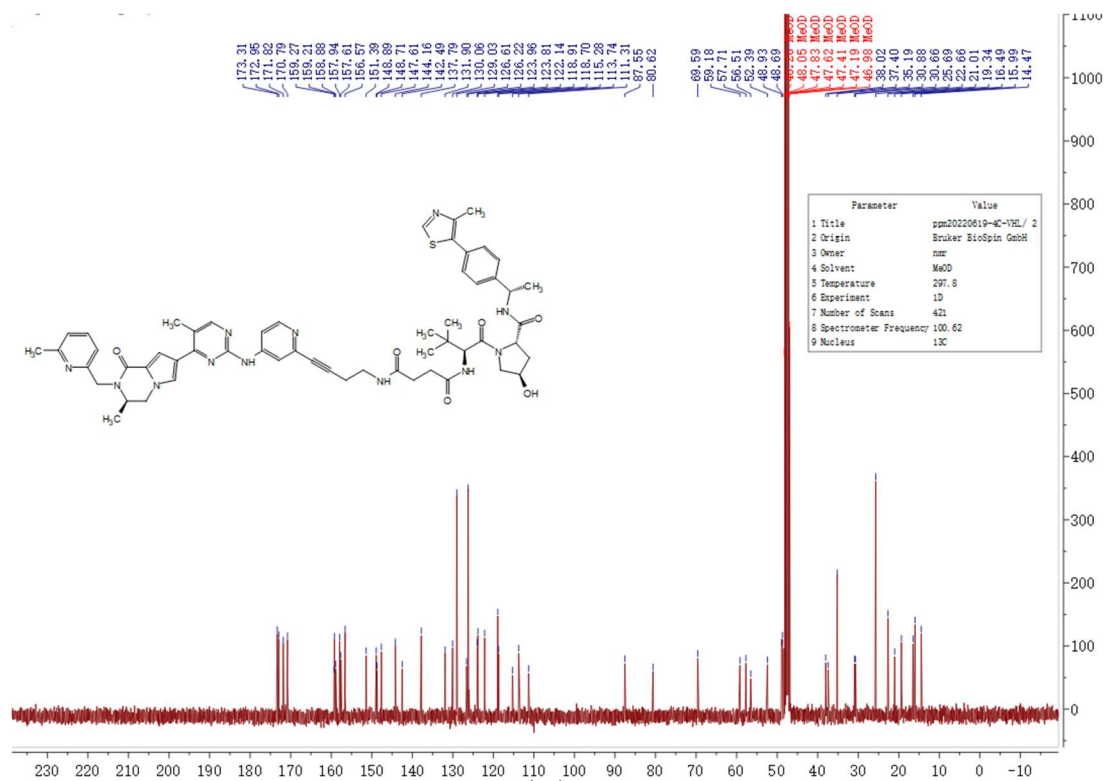

<sup>13</sup>C NMR of B2-4

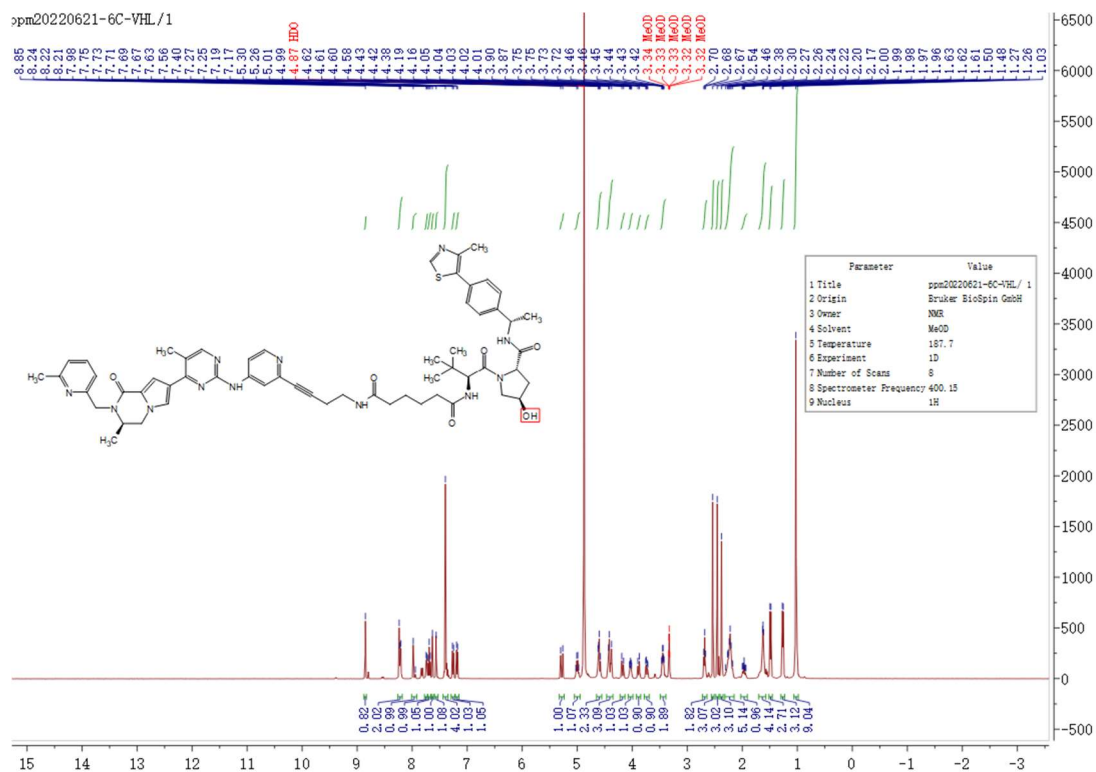

<sup>1</sup>H NMR of B2-6

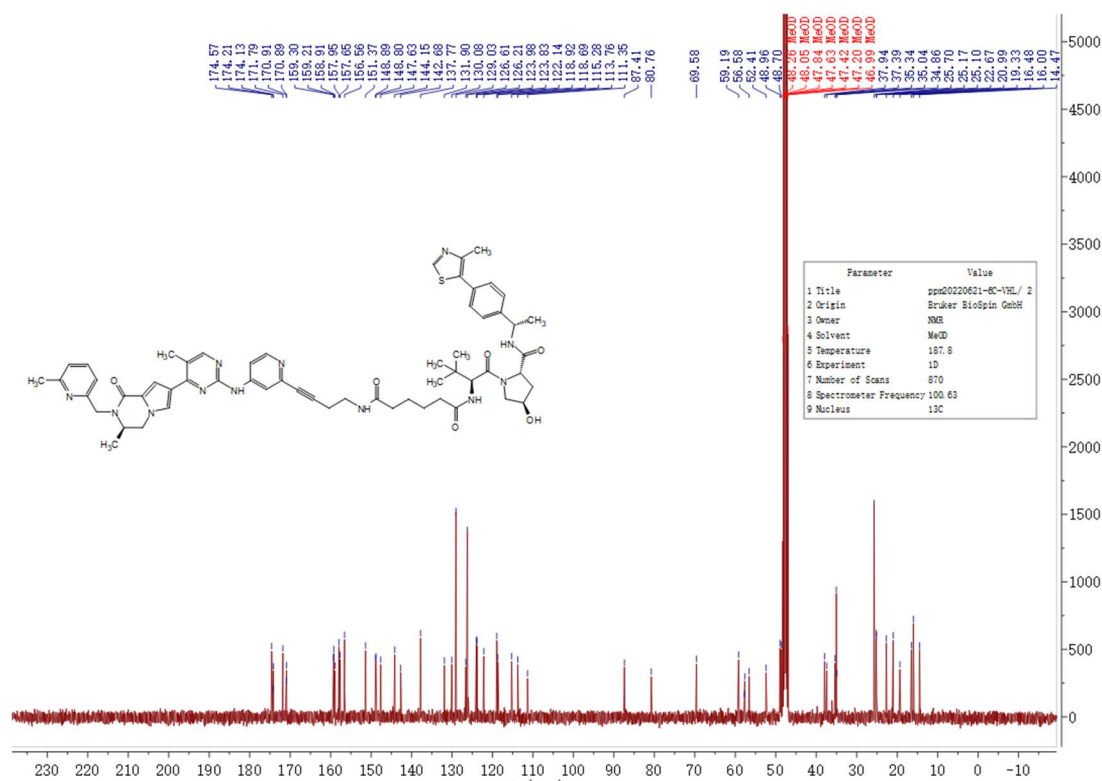

<sup>13</sup>C NMR of B2-6

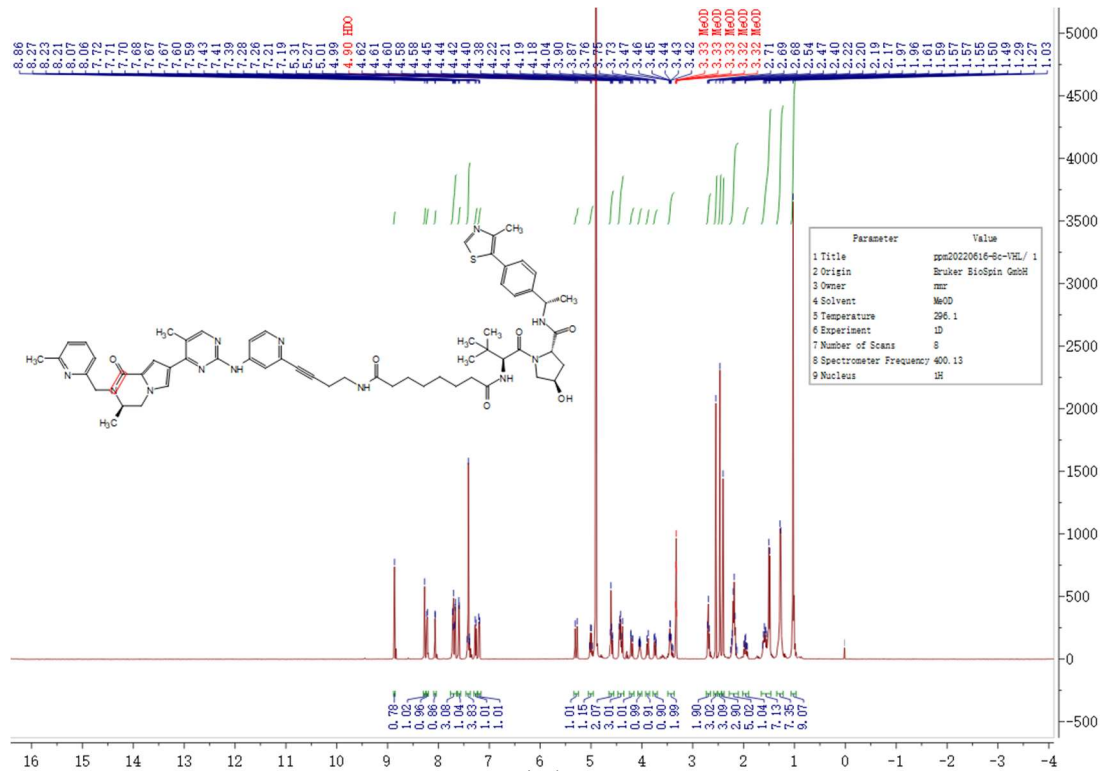

**<sup>1</sup>H NMR of B2-8**

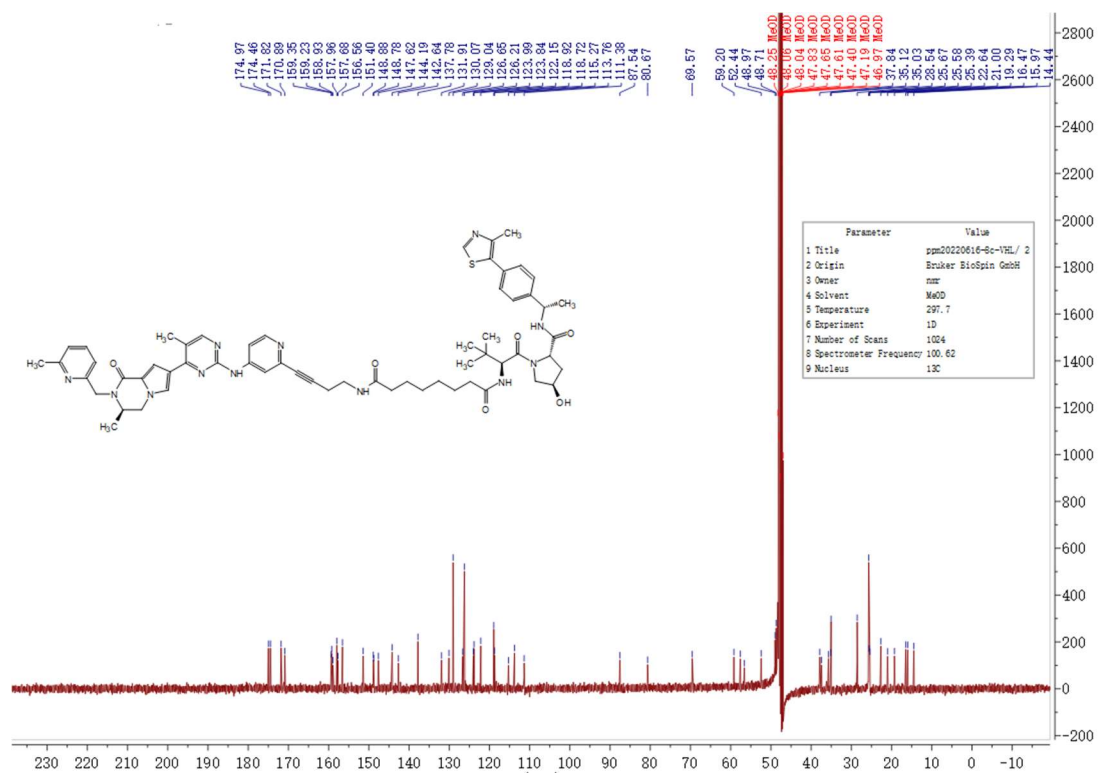

**<sup>13</sup>C NMR of B2-8**



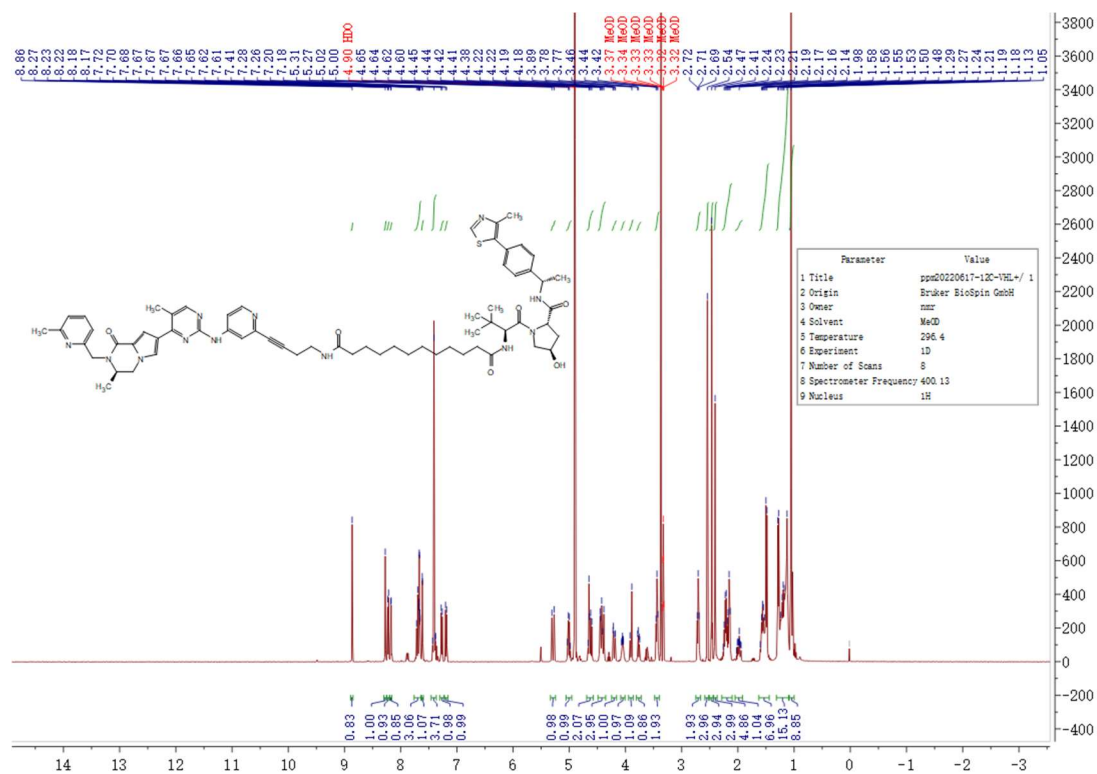

<sup>1</sup>H NMR of B2-12

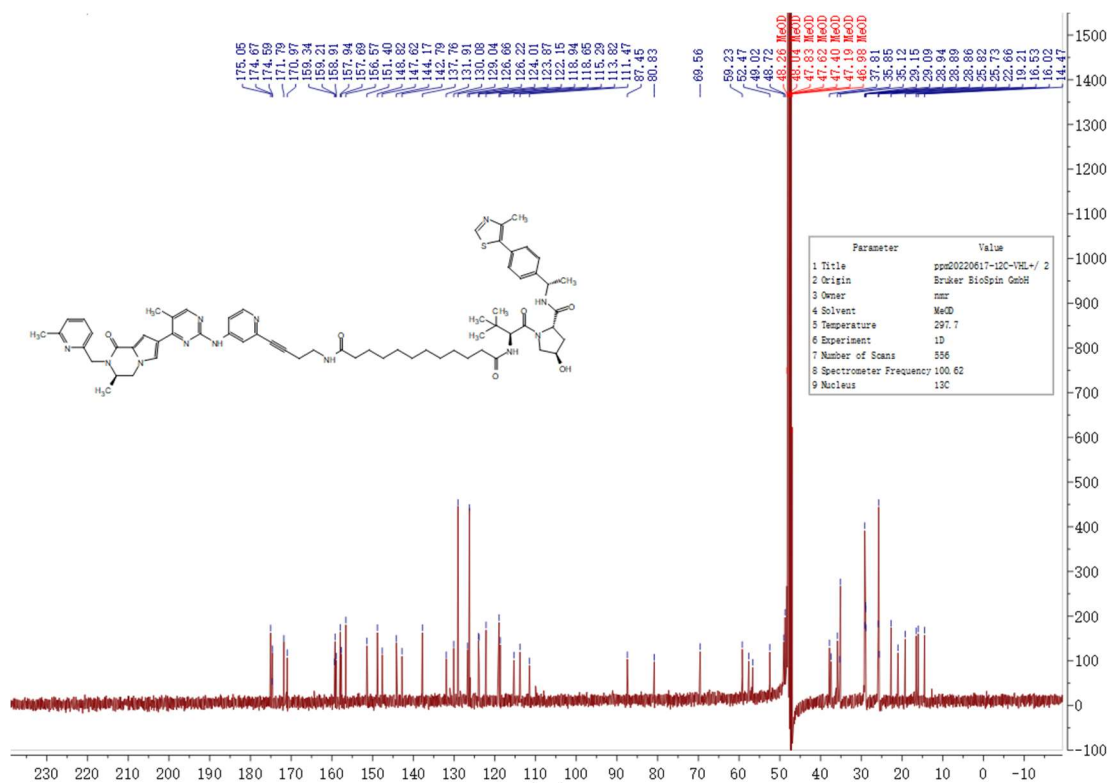

<sup>13</sup>C NMR of B2-12

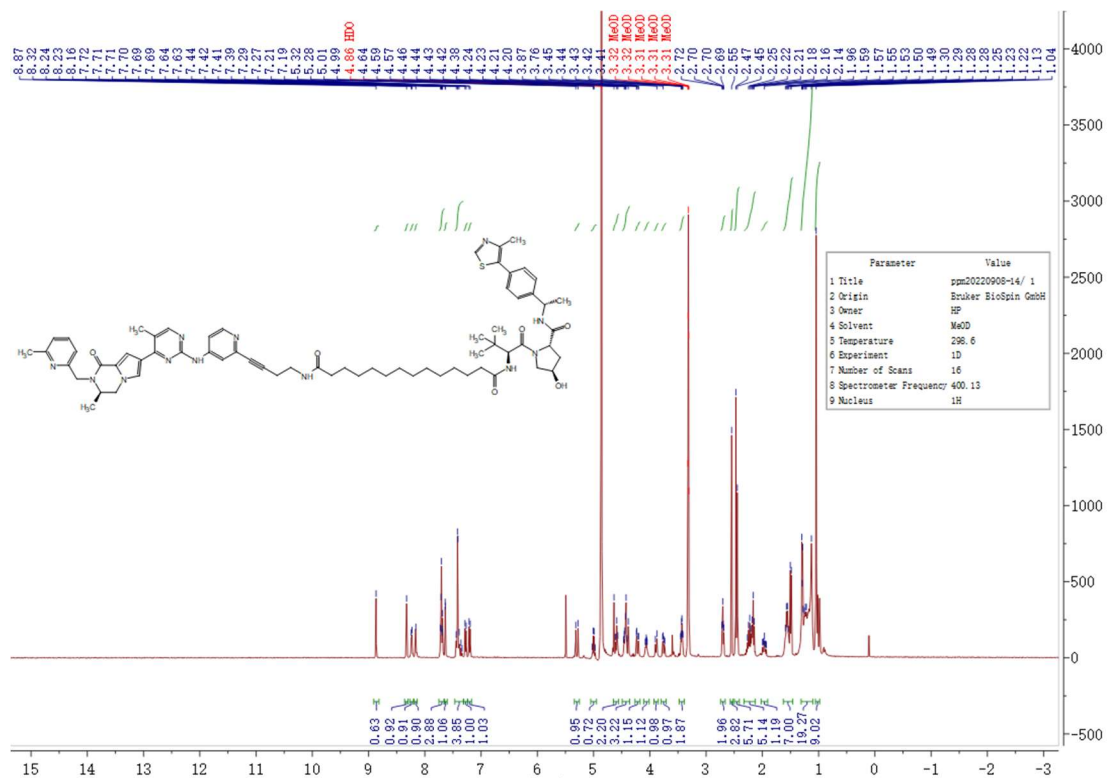

**<sup>1</sup>H NMR of B2-14**

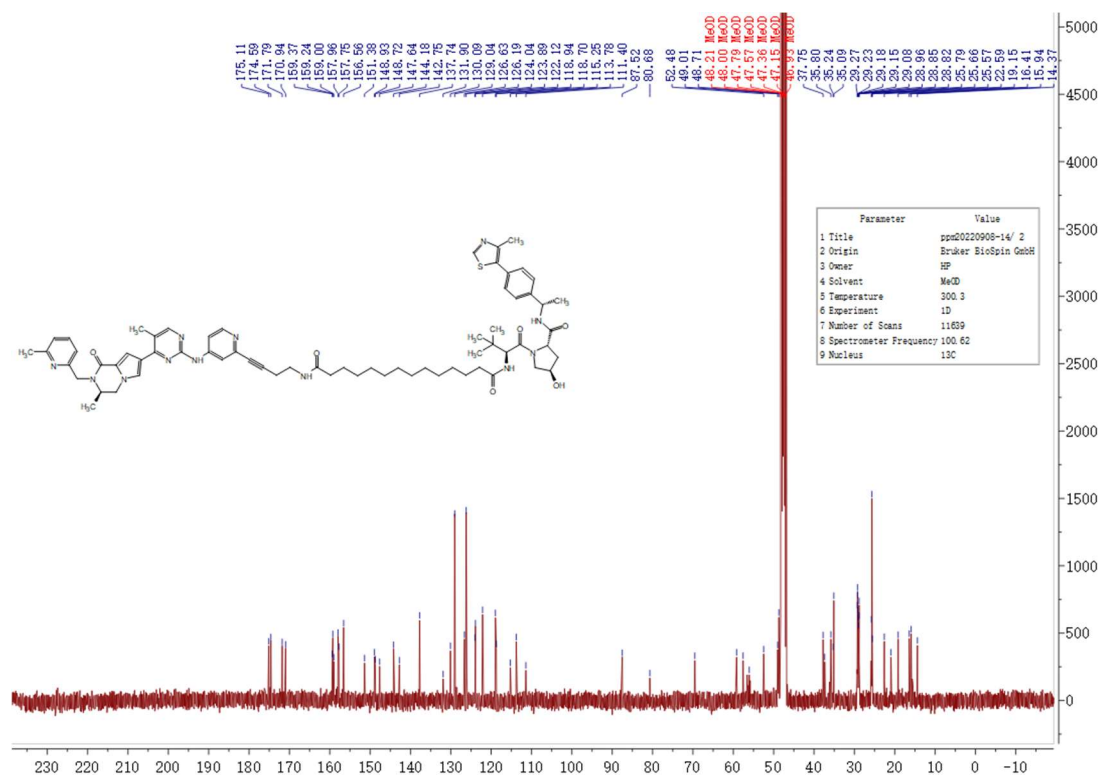

**<sup>13</sup>C NMR of B2-14**



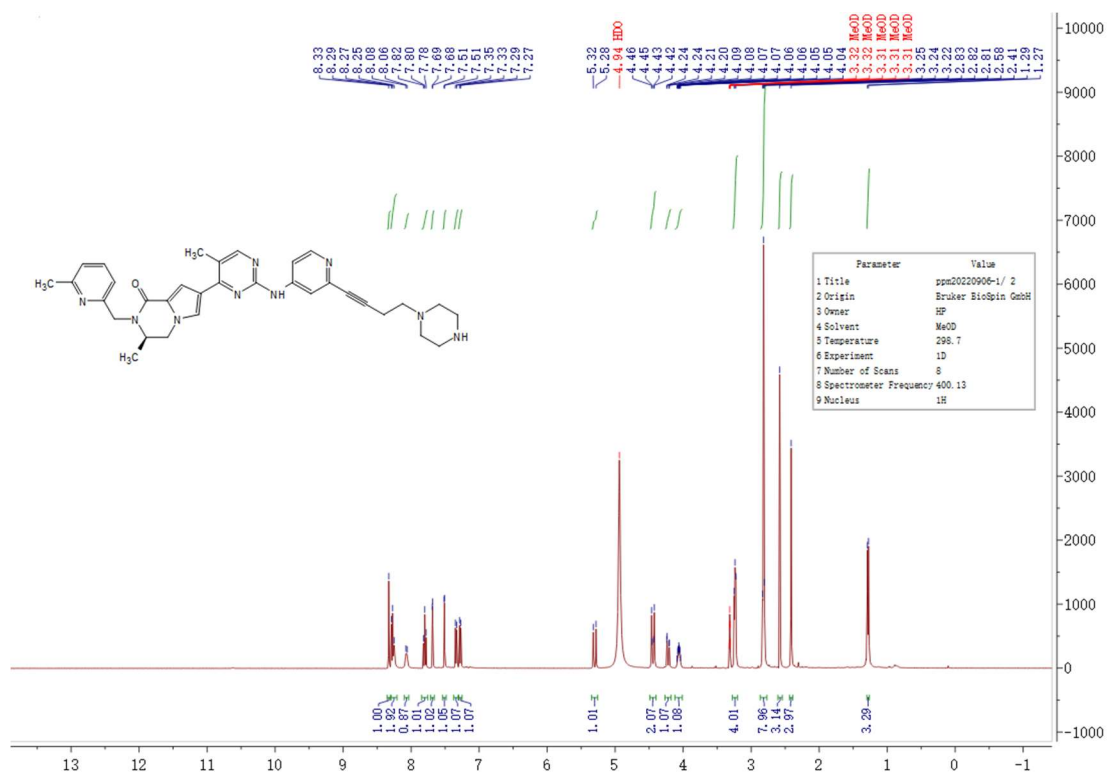

<sup>1</sup>H NMR of B-P

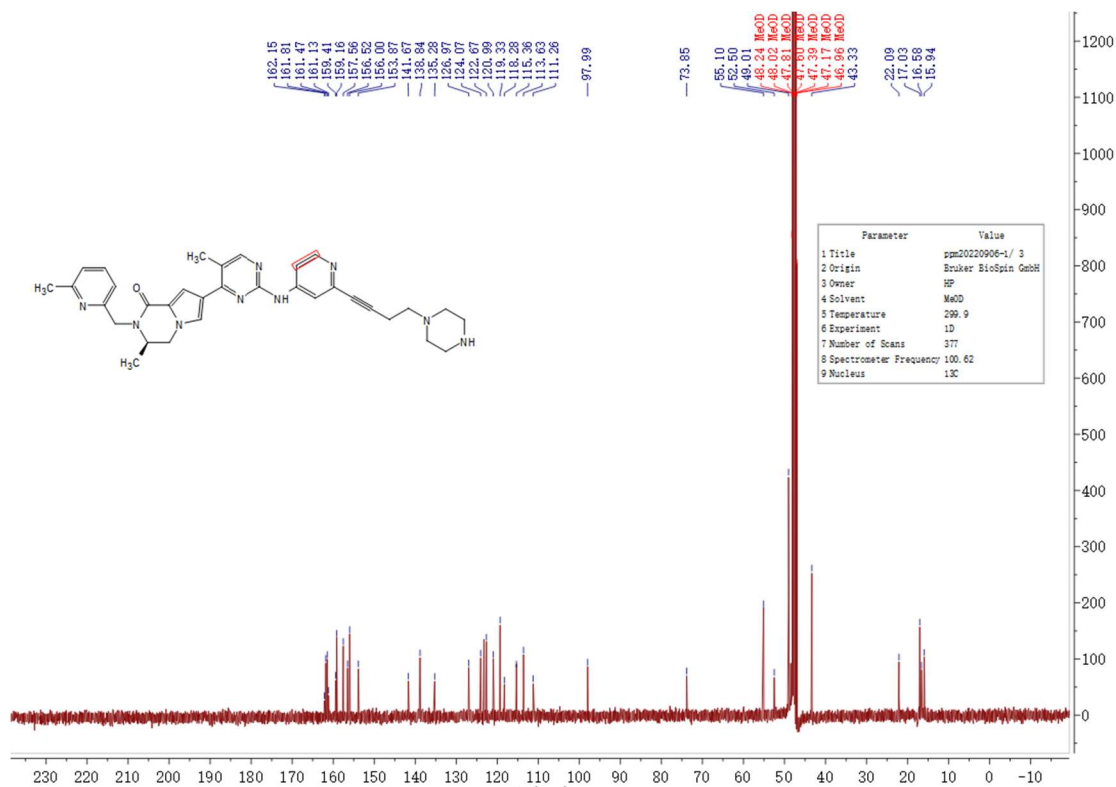

<sup>13</sup>C NMR of B-P

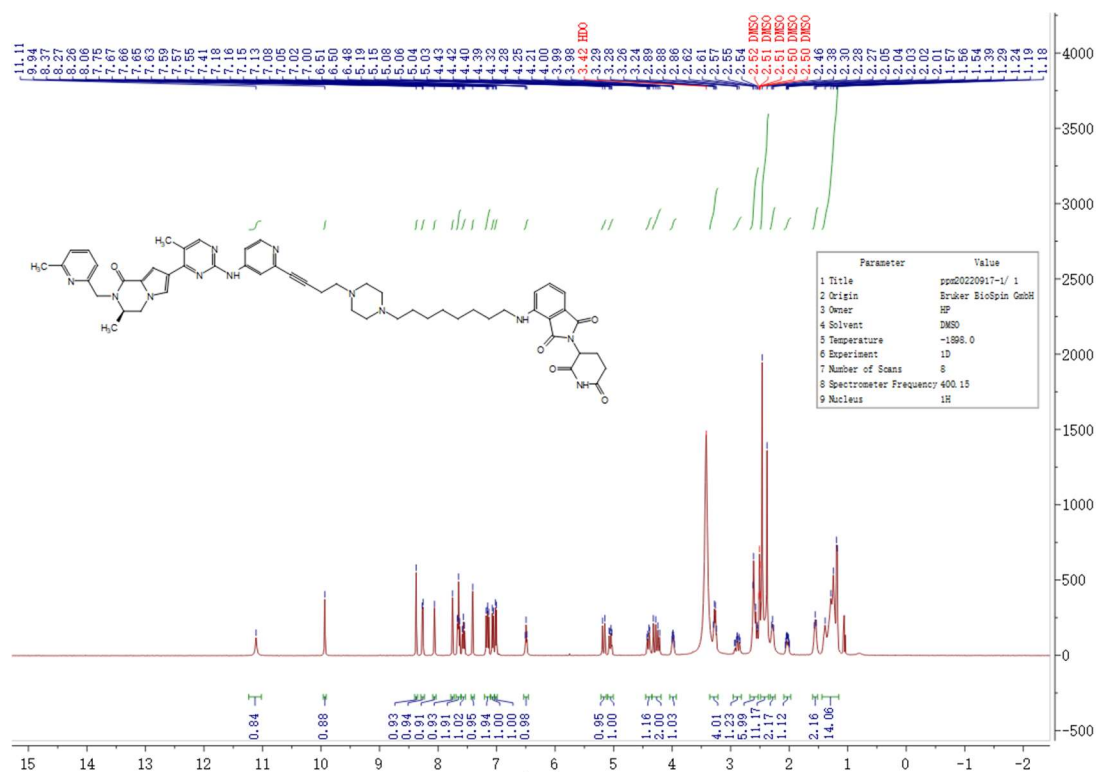

**<sup>1</sup>H NMR of B1-10P**

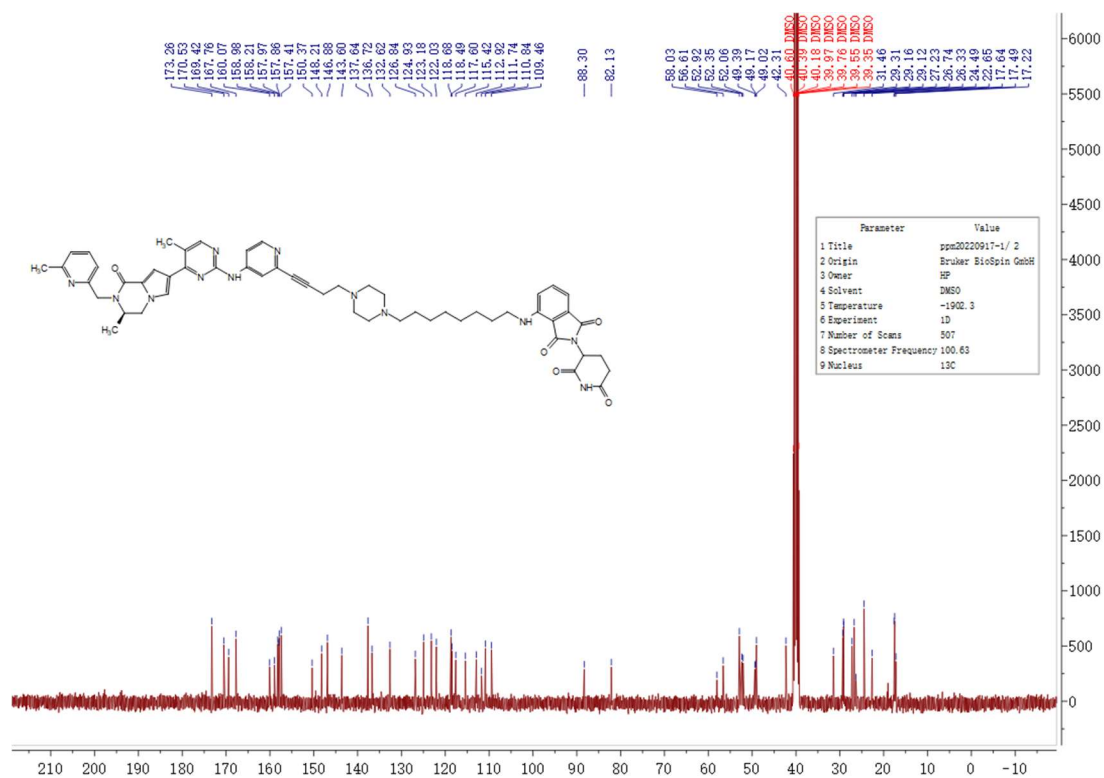

**<sup>13</sup>C NMR of B1-10P**

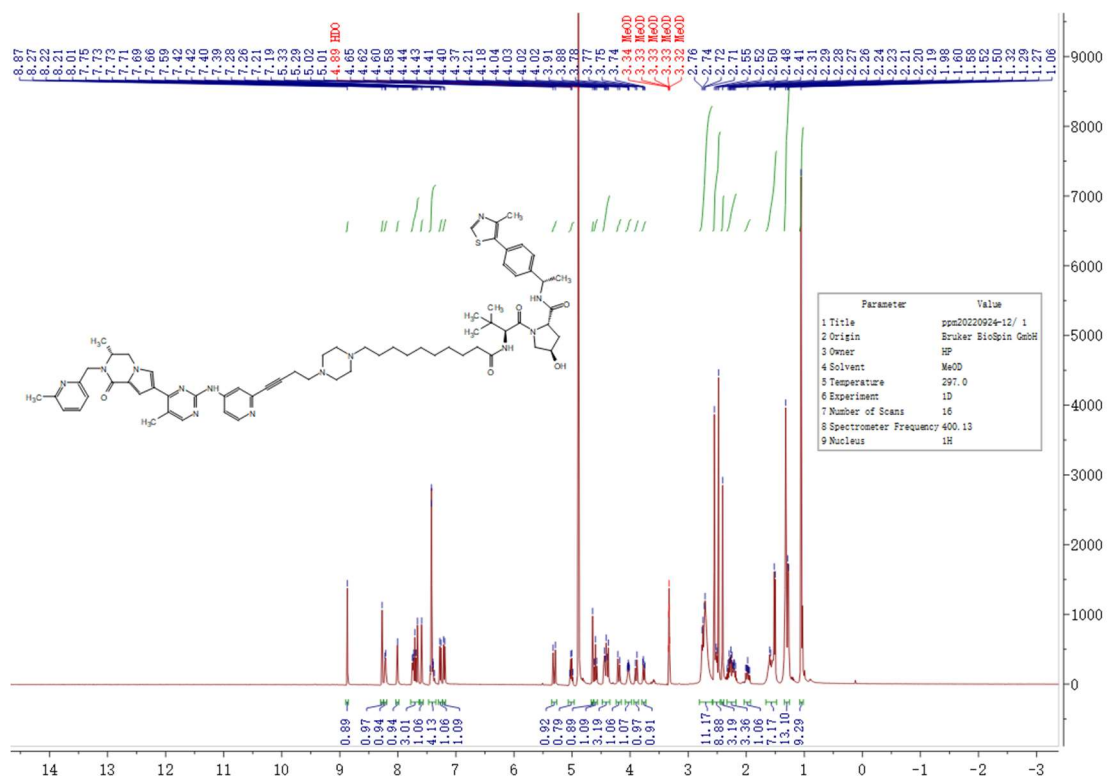

<sup>1</sup>H NMR of B2-12P

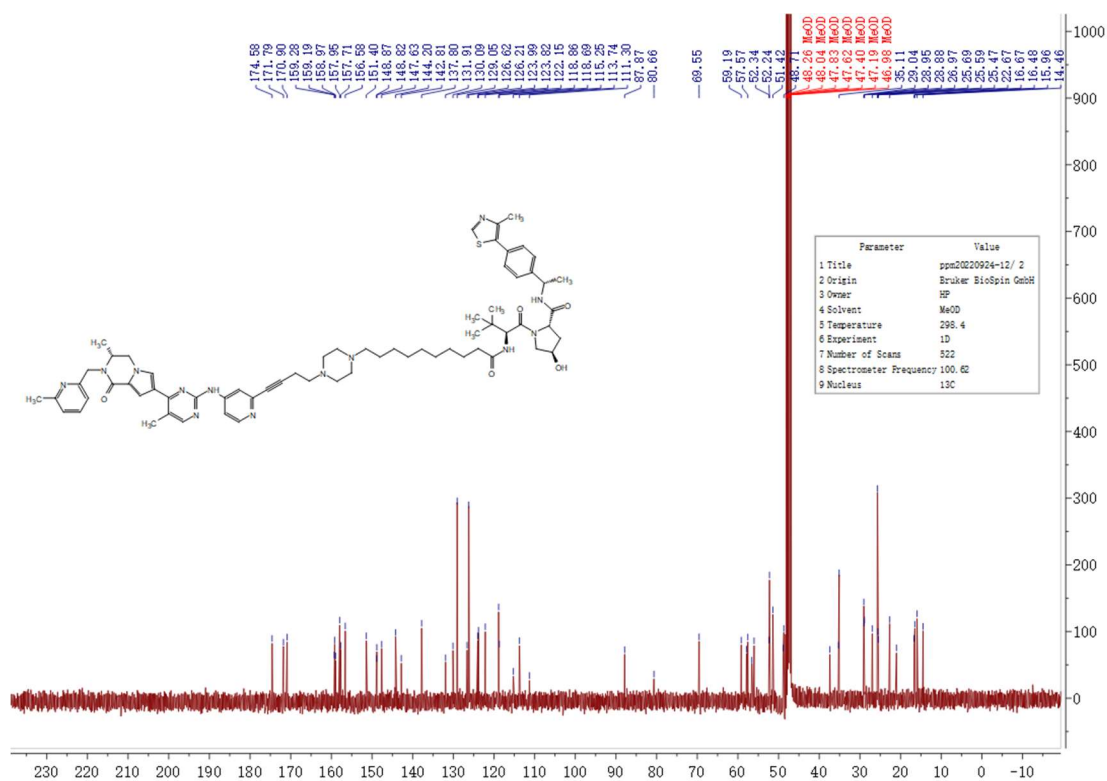

<sup>13</sup>C NMR of B2-12P

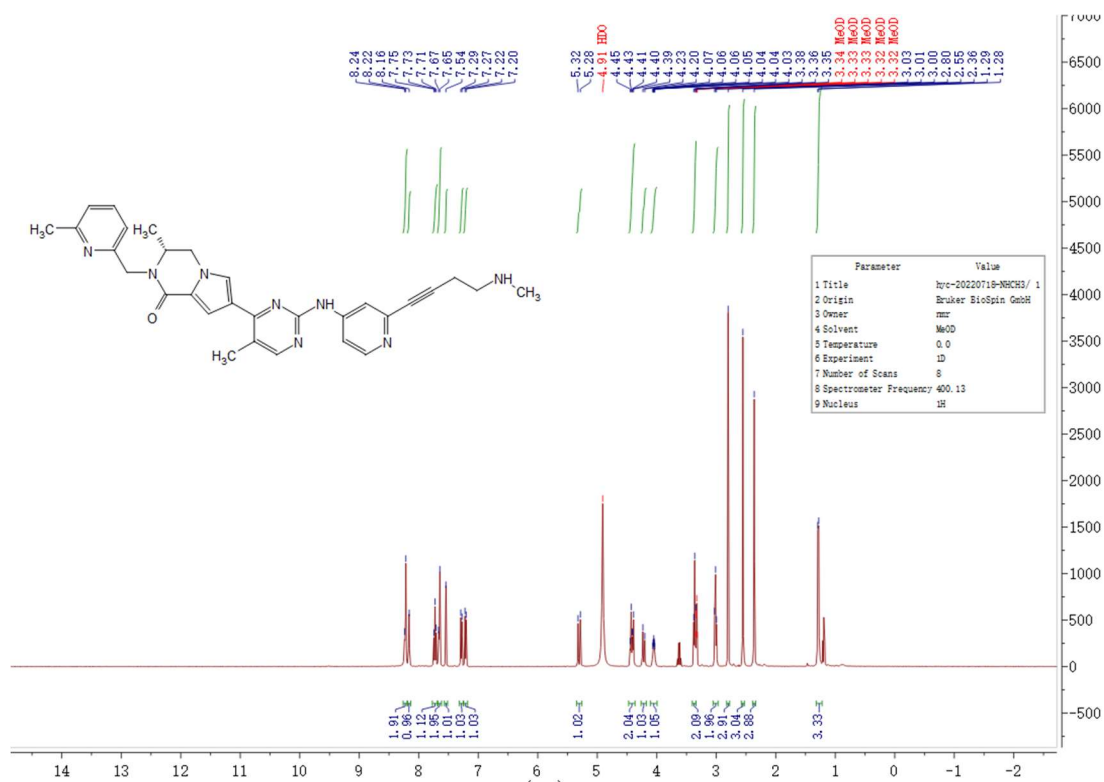

<sup>1</sup>H NMR of B-J

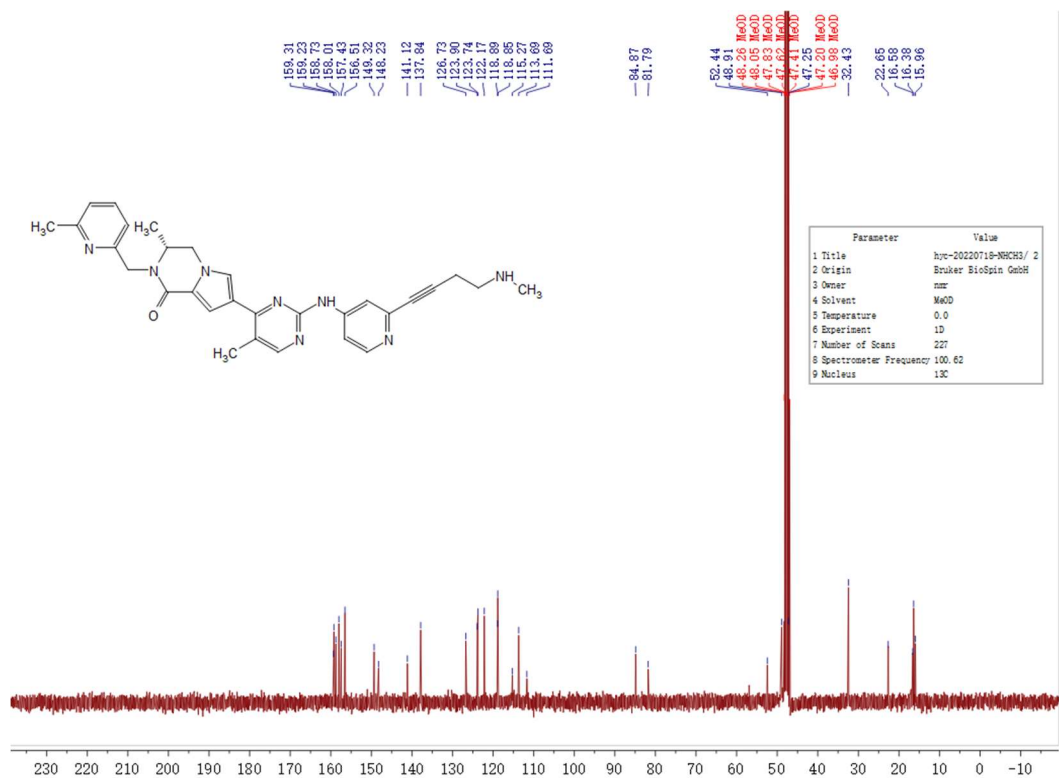

<sup>13</sup>C NMR of B-J

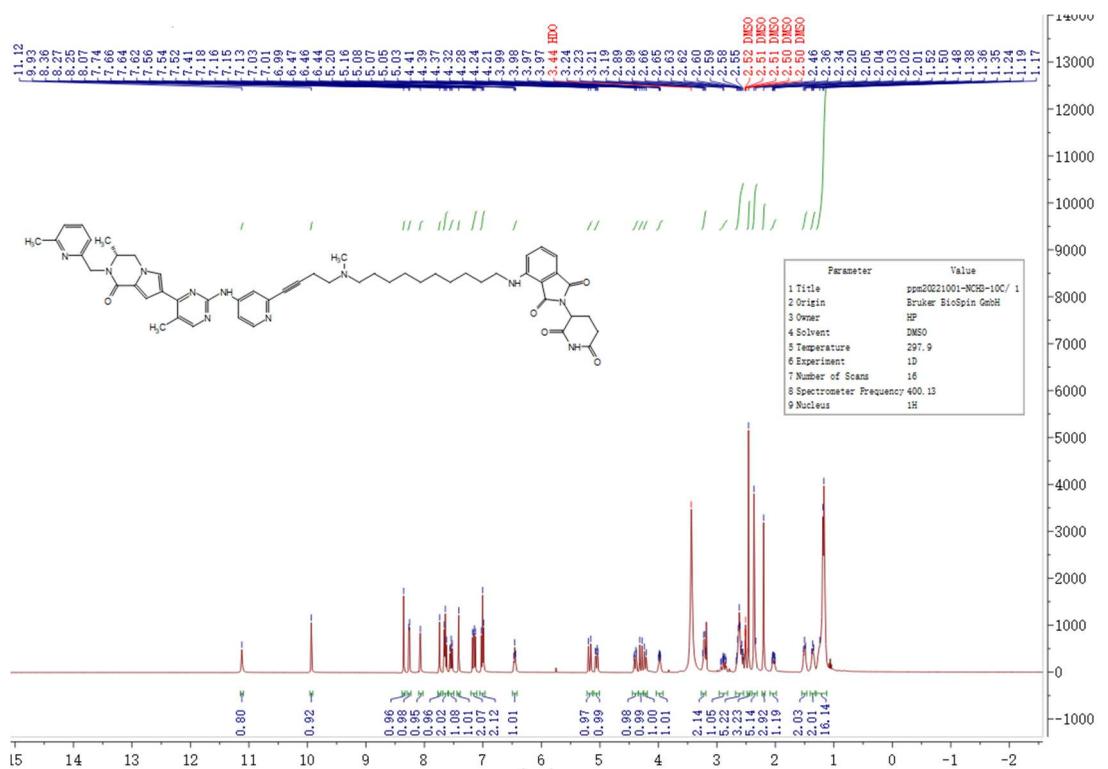

**<sup>1</sup>H NMR of B1-10J**

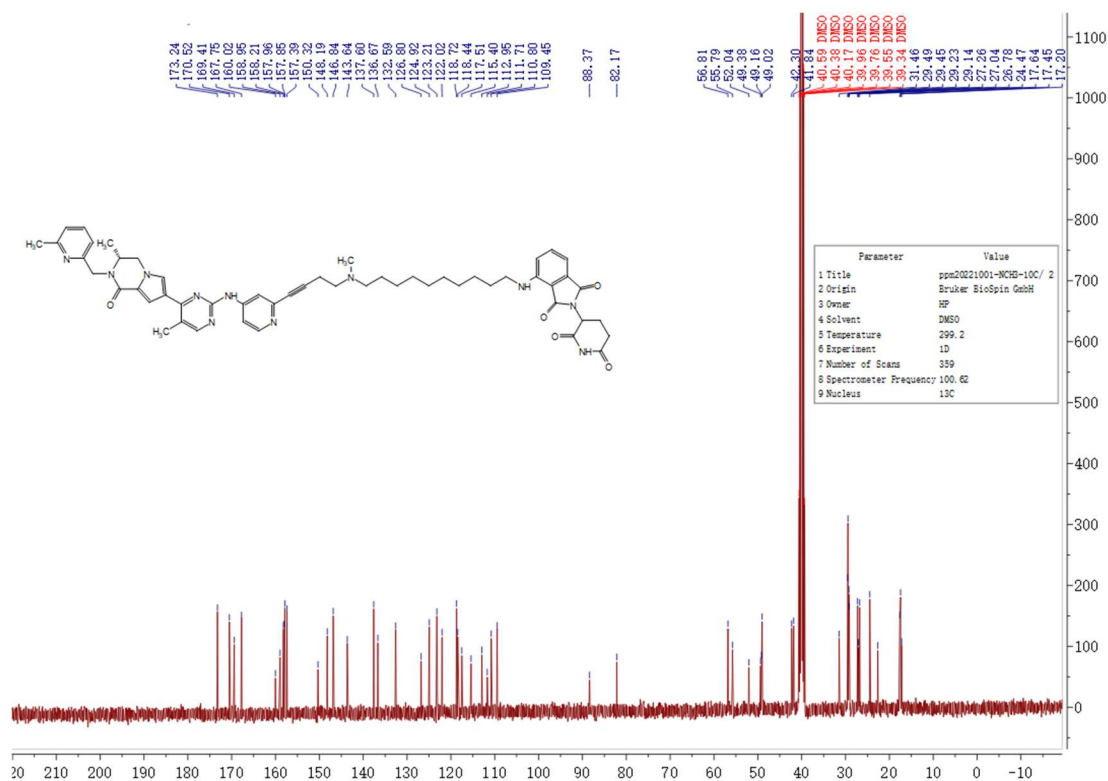

**<sup>13</sup>C NMR of B1-10J**

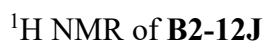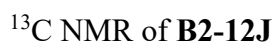



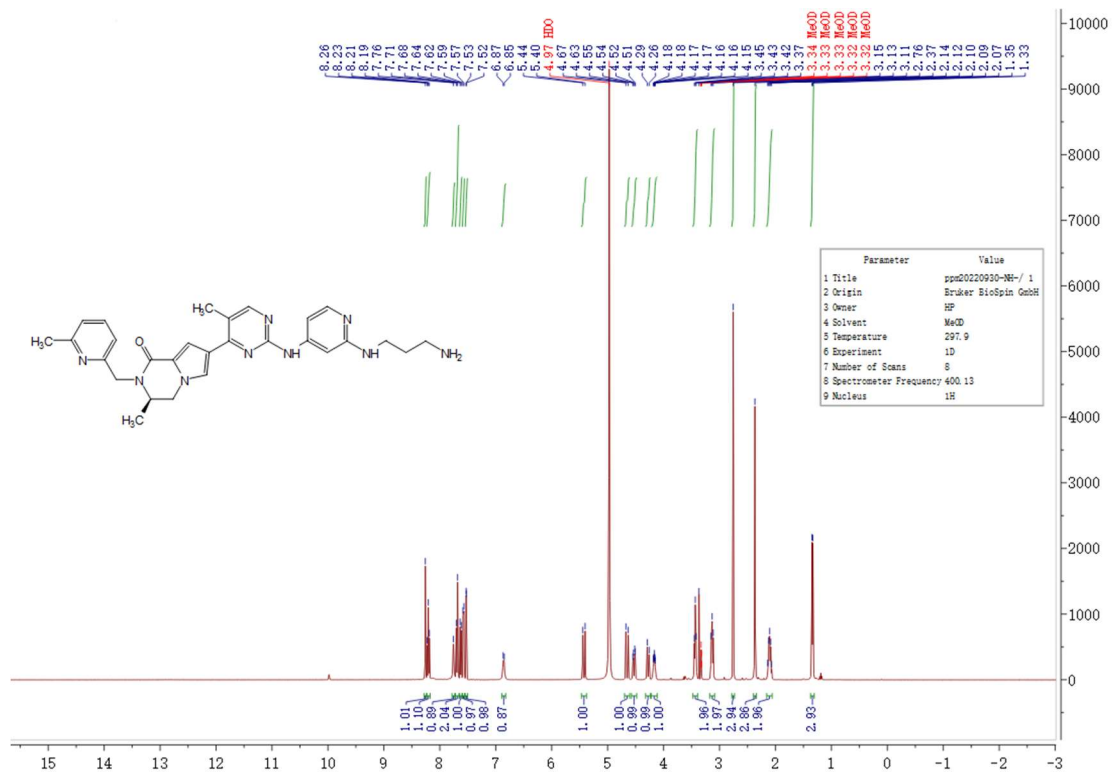

<sup>1</sup>H NMR of B-N

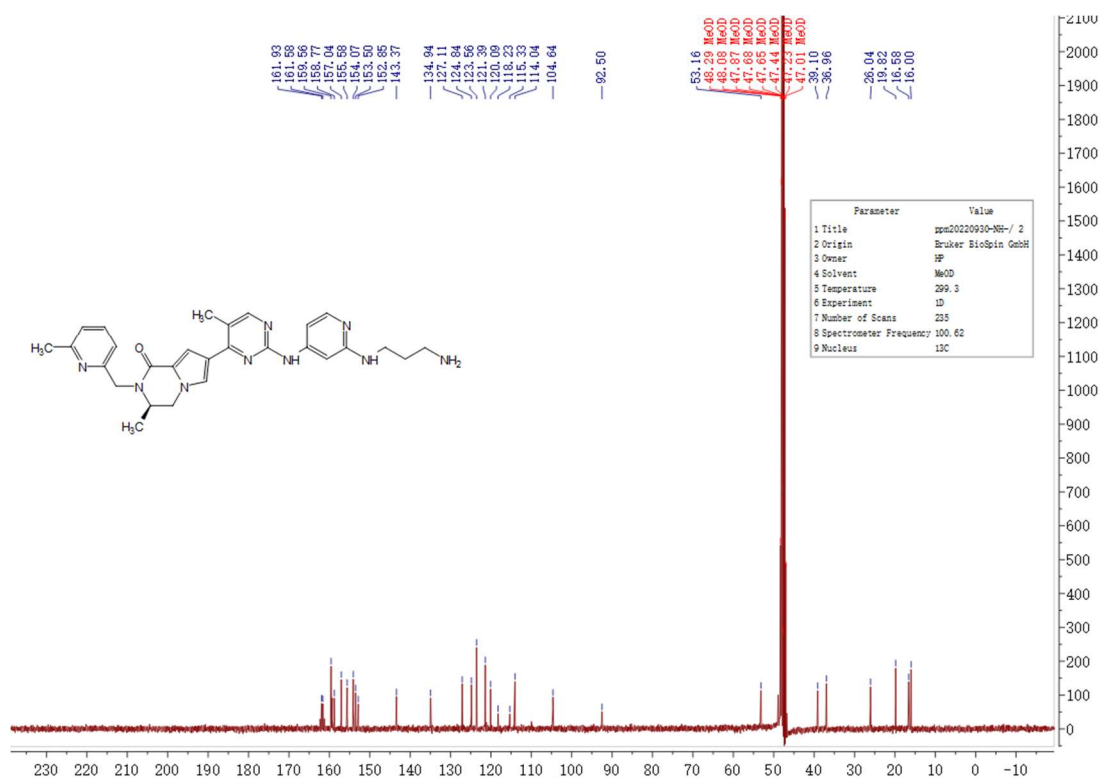

<sup>13</sup>C NMR of B-N

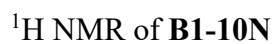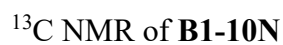





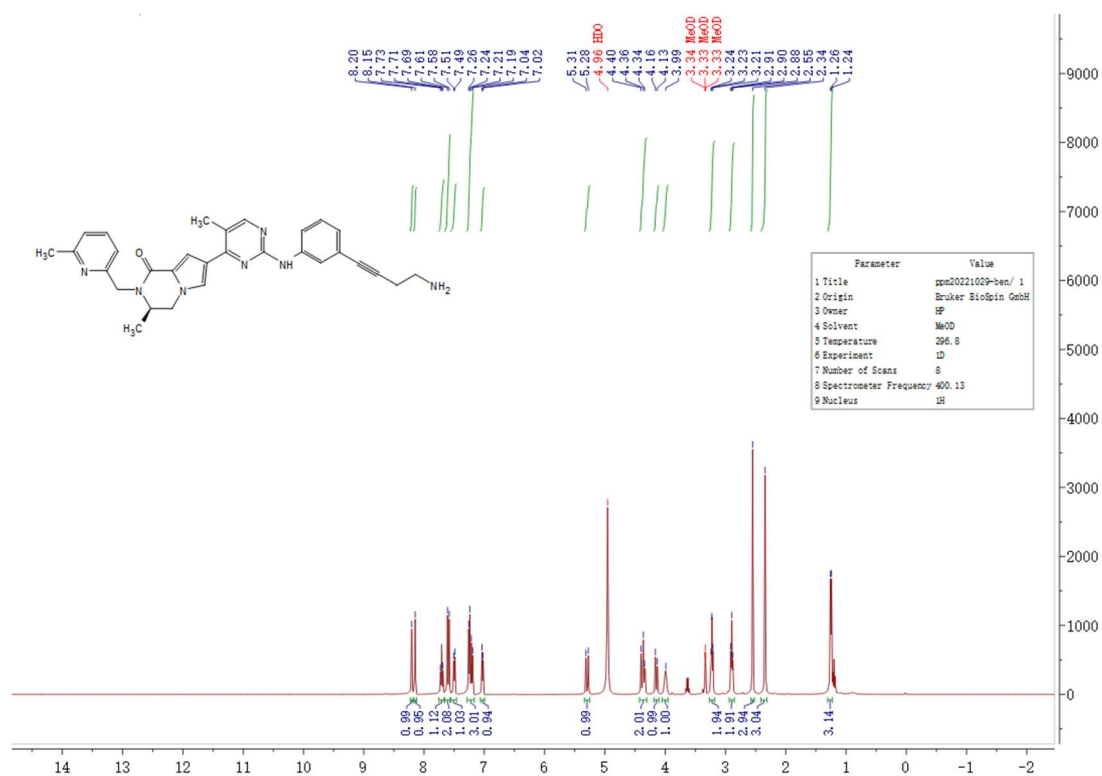

<sup>1</sup>H NMR of B-B

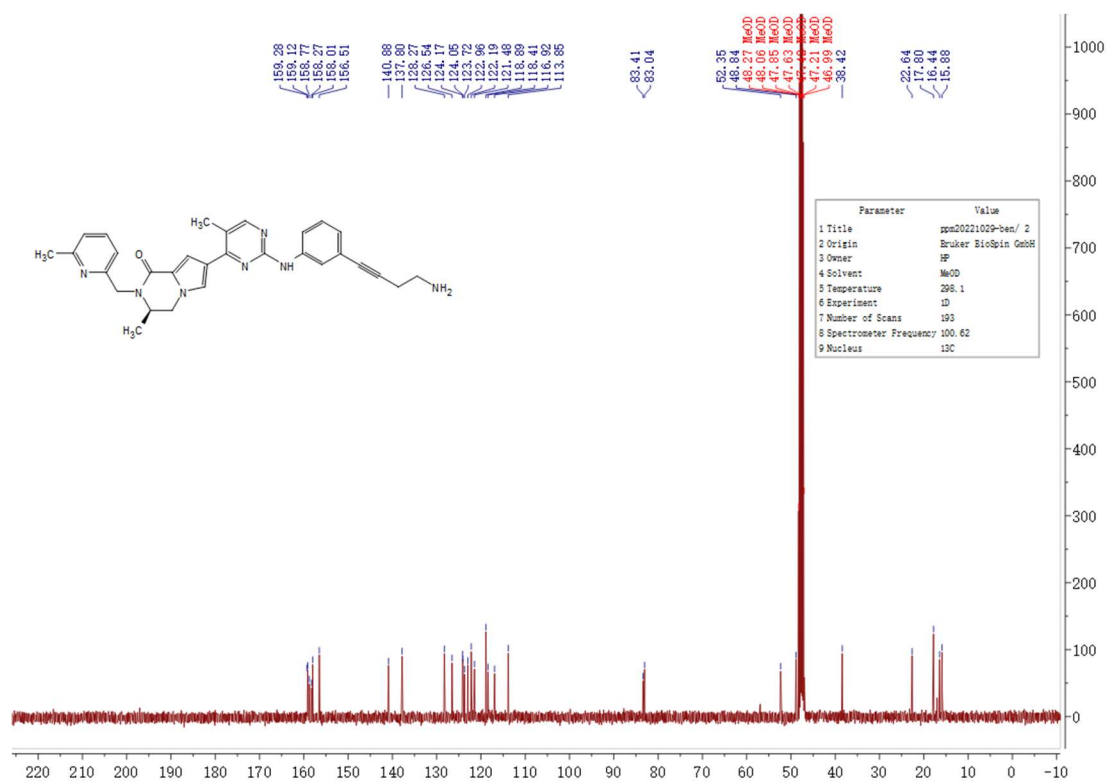

<sup>13</sup>C NMR of B-B

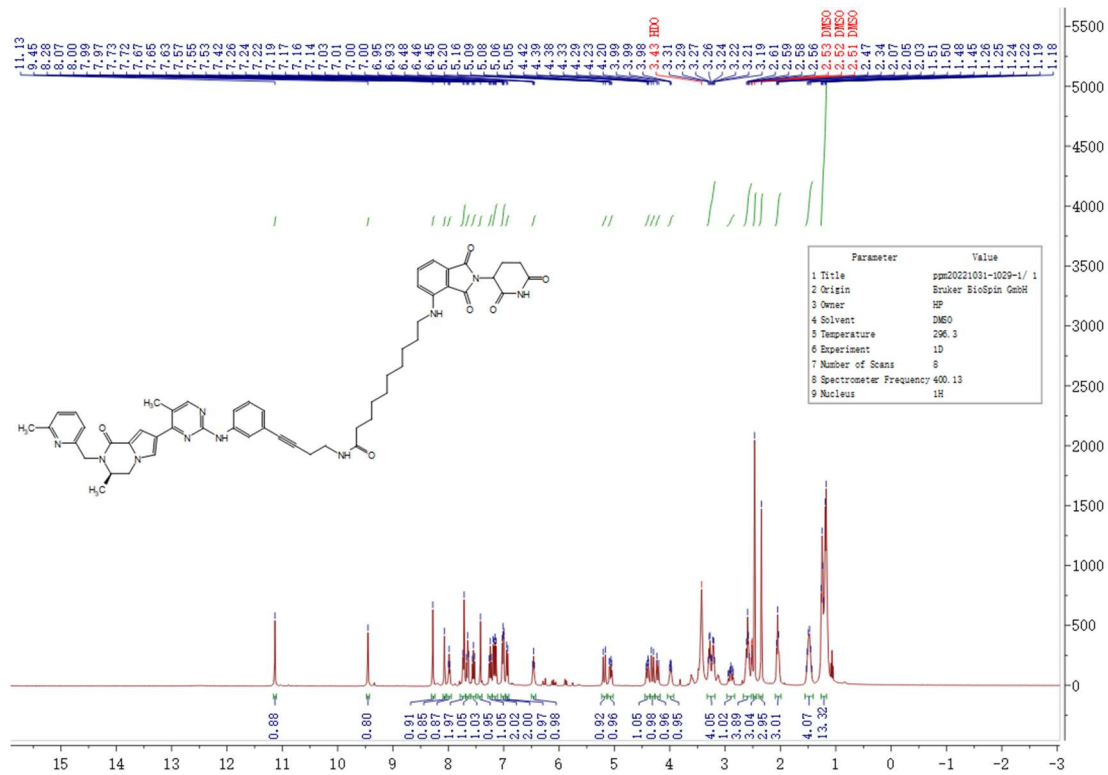

<sup>1</sup>H NMR of B1-10B

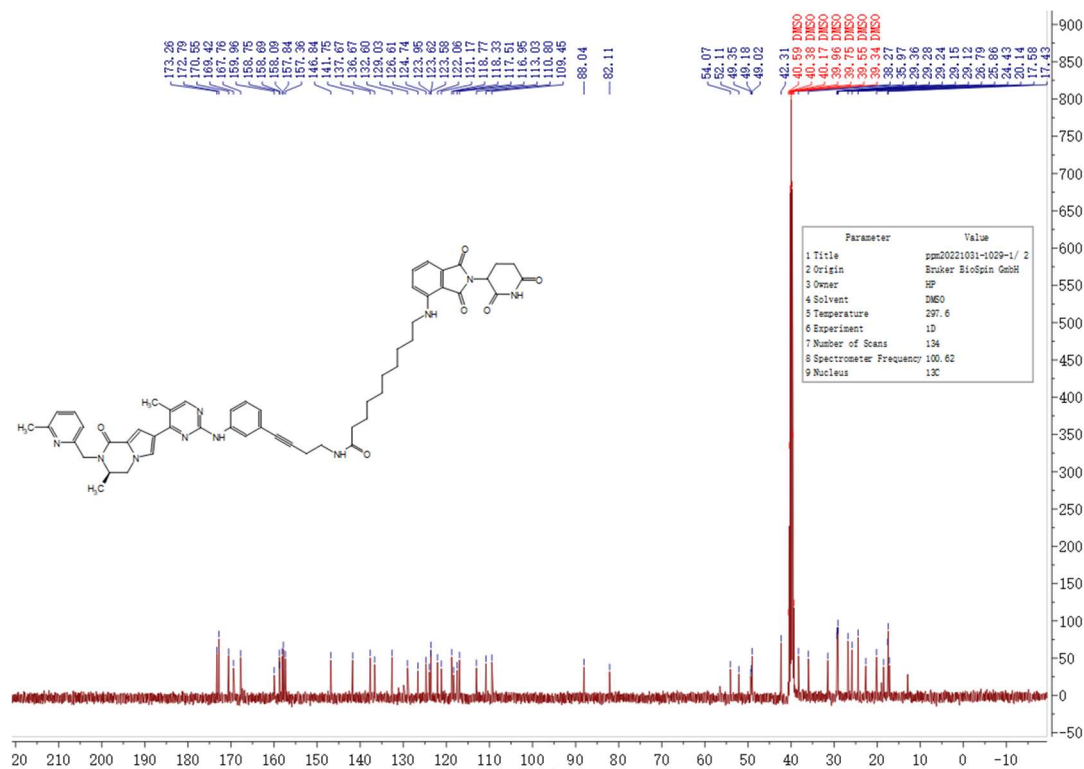

<sup>13</sup>C NMR of B1-10B

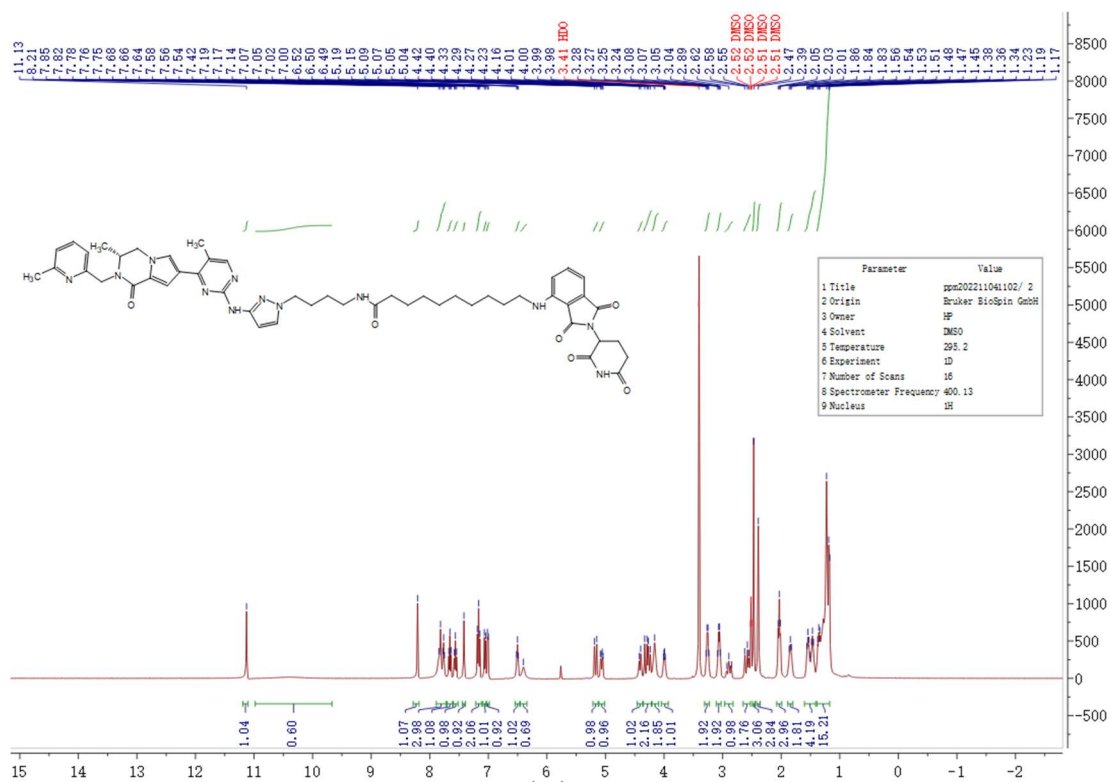

<sup>1</sup>H NMR of B-BZ

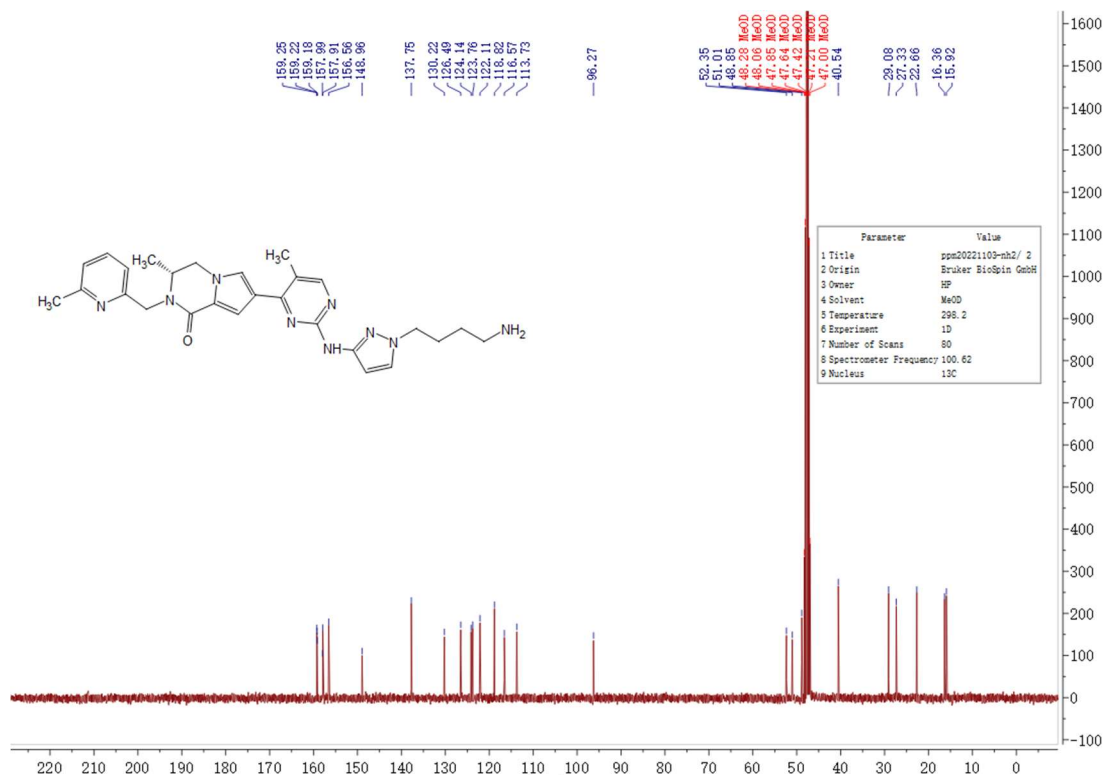

<sup>13</sup>C NMR of B-BZ

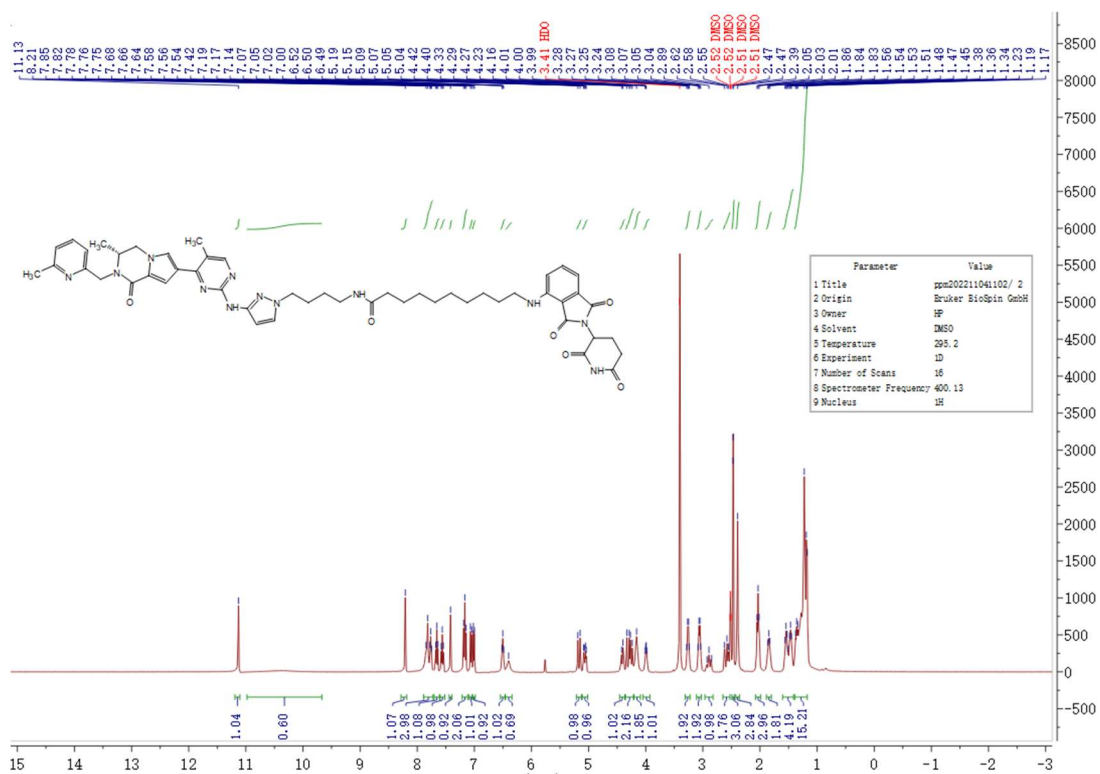

<sup>1</sup>H NMR of B1-10BZ

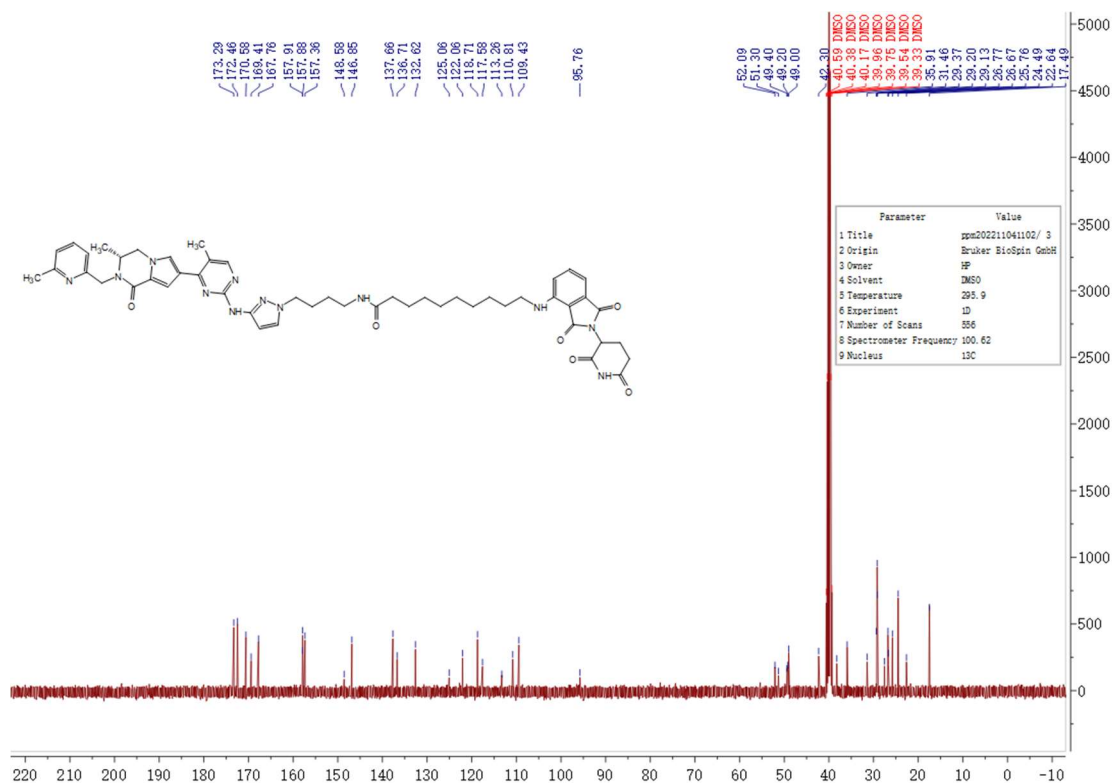

<sup>13</sup>C NMR of B1-10BZ

## 6. HRMS spectrum

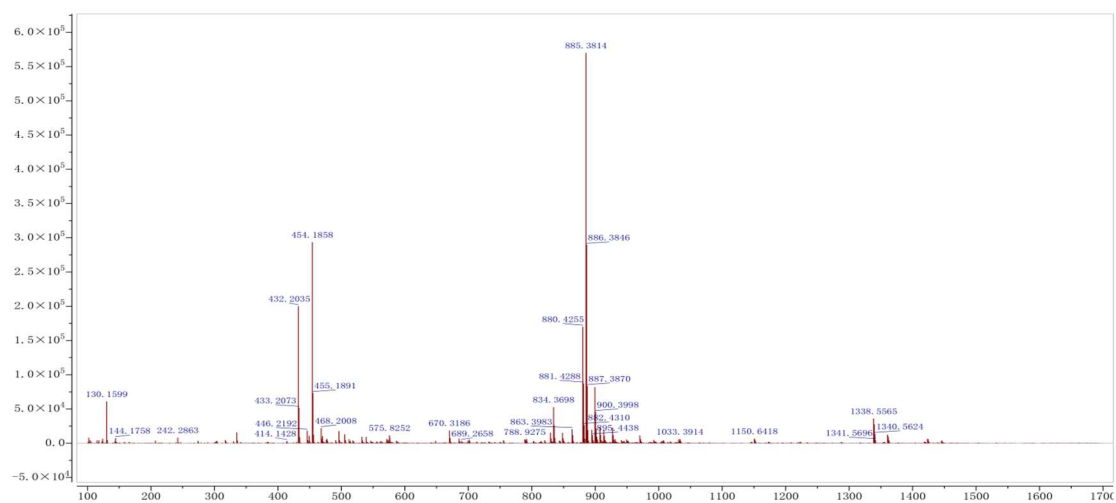

HRMS of (E)-7-(2,6-dimethoxy-4-(3-oxo-3-(6-oxo-3,6-dihydropyridin-1(2H)-yl)prop-1-en-1-yl)phenoxy)heptanoic acid (7)

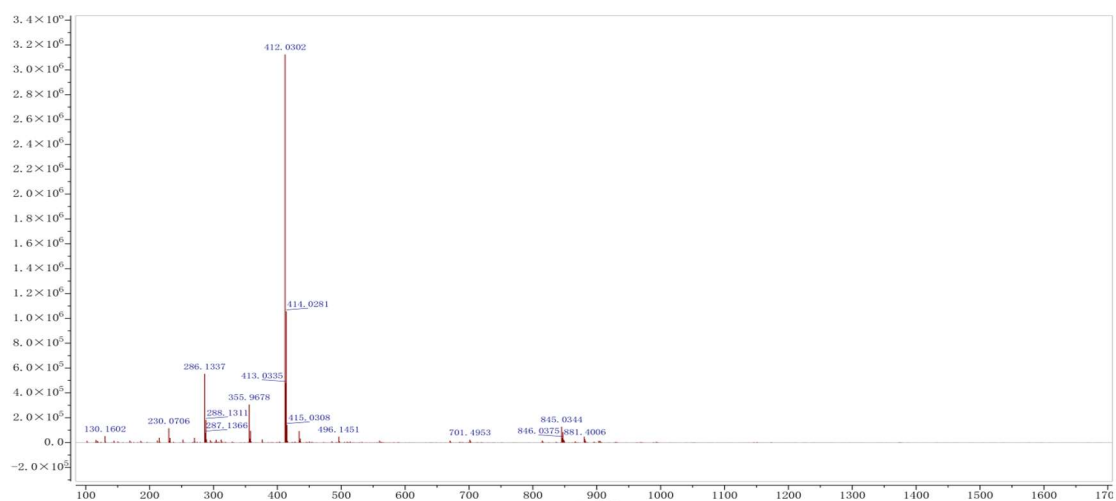

HRMS of tert-butyl (3-((5-chloro-4-iodopyridin-2-yl)amino)propyl)carbamate (9)

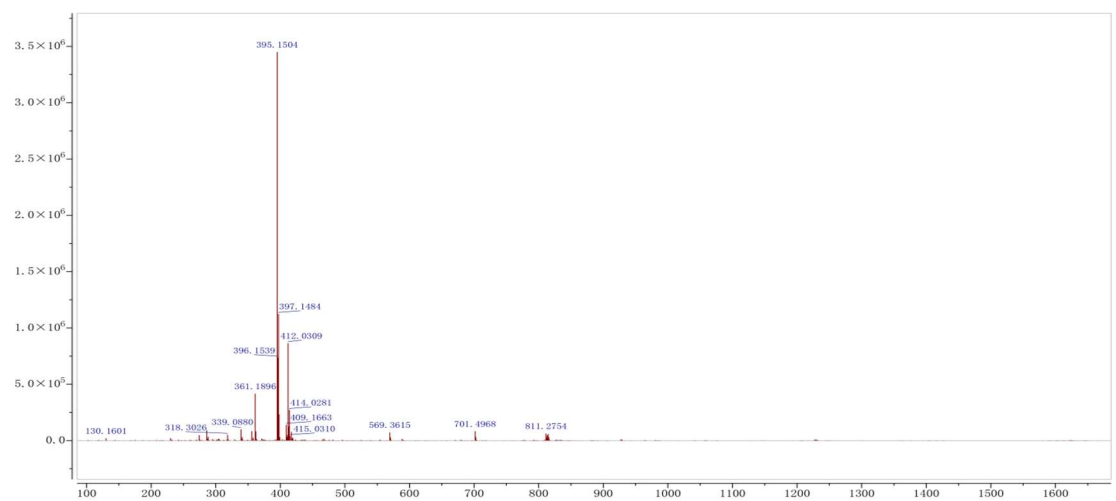

HRMS of 4-(2-((3-((tert-butoxycarbonyl)amino)propyl)amino)-5-chloropyridin-4-yl)-1H-pyrrole-2-carboxylic acid (**14**)

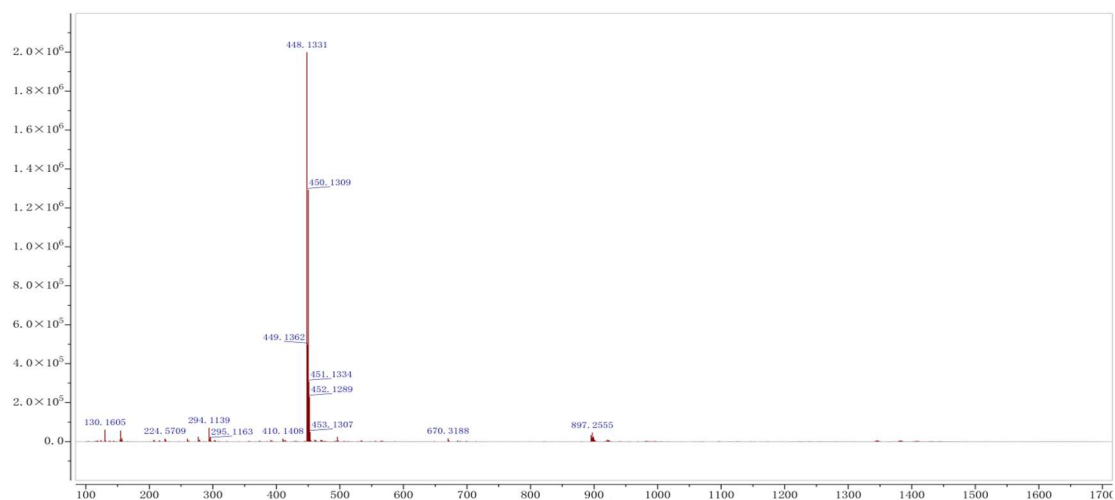

HRMS of A

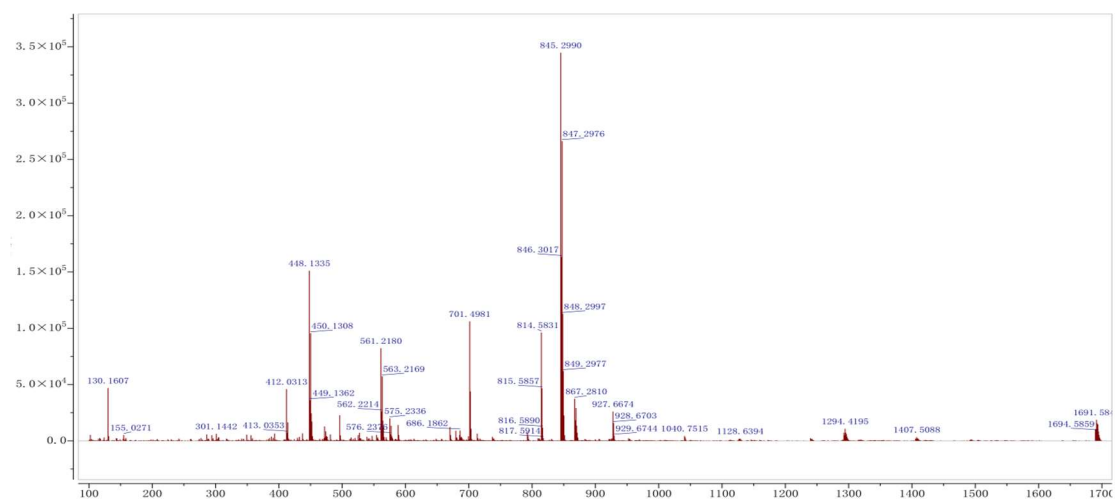

HRMS of A1

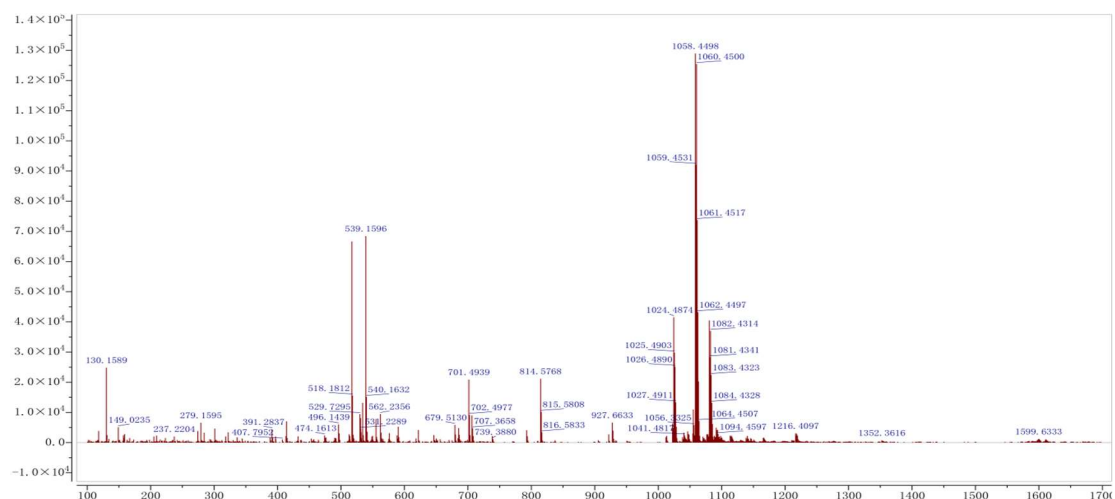

HRMS of A2

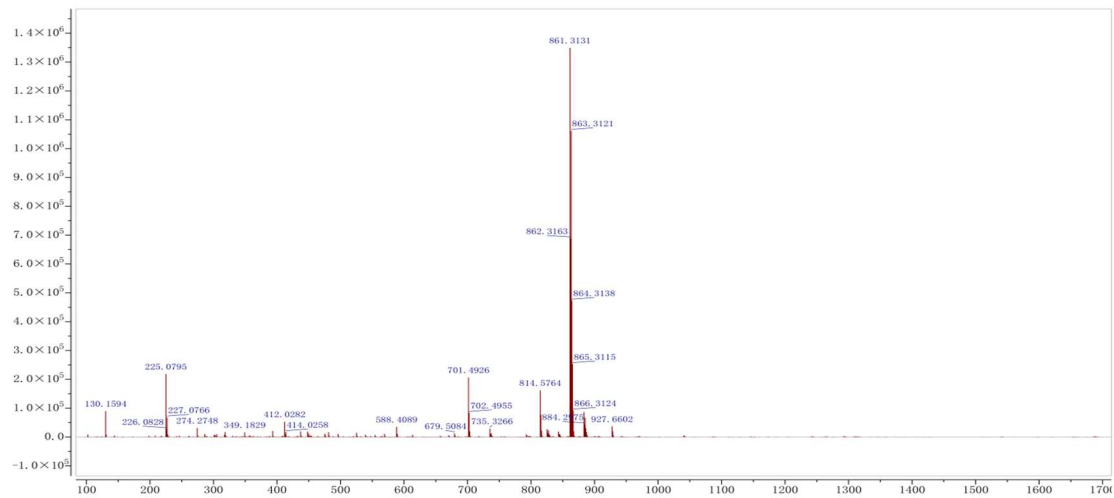

HRMS of A3

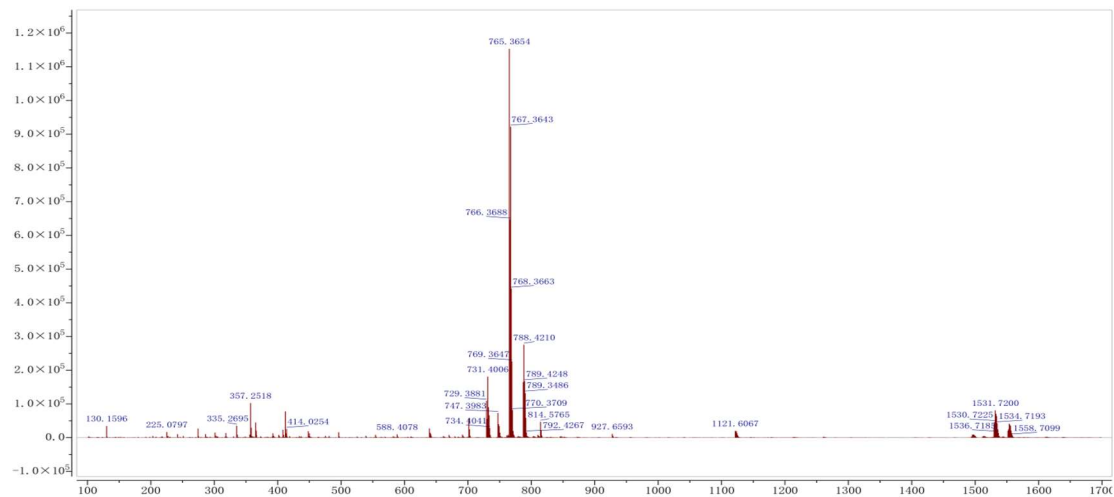

HRMS of A4

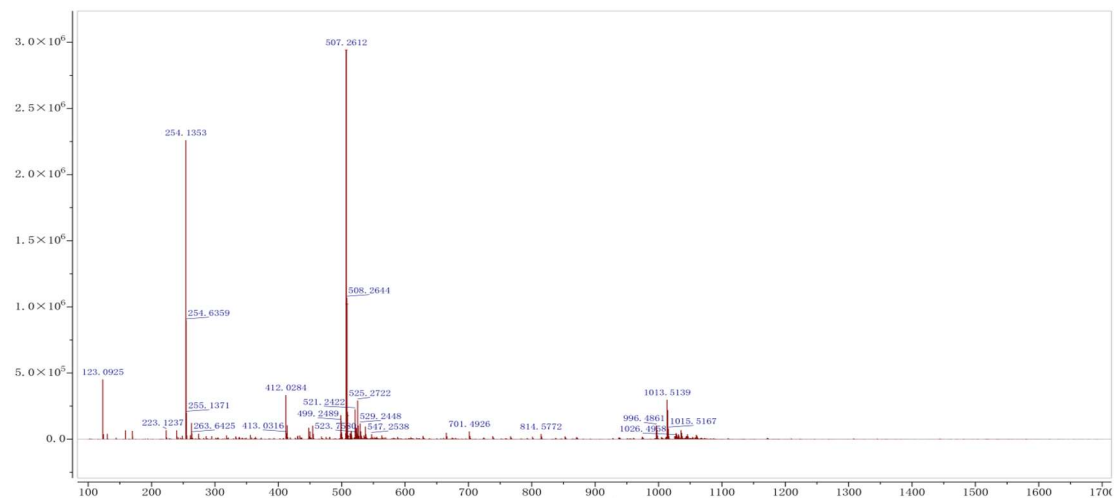

HRMS of B



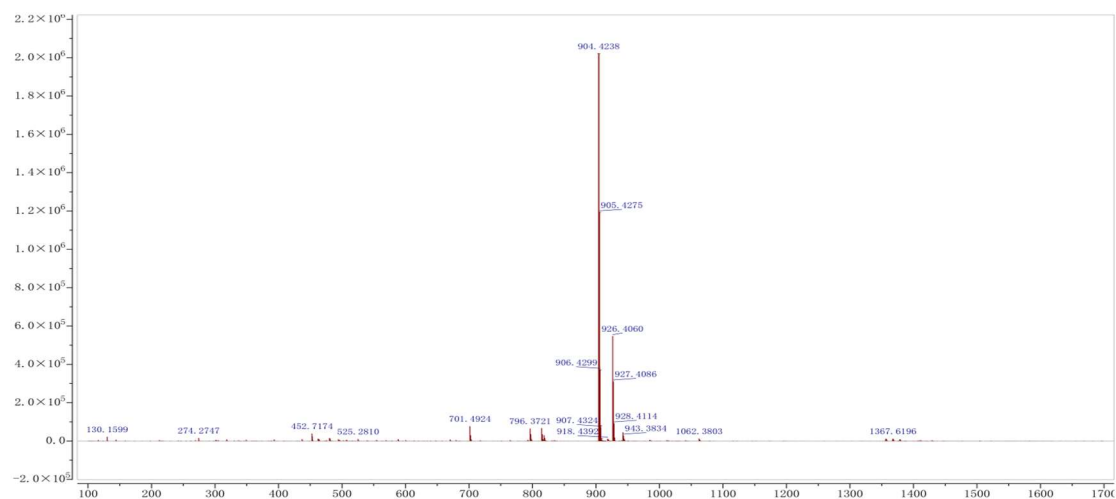

HRMS of B1-8

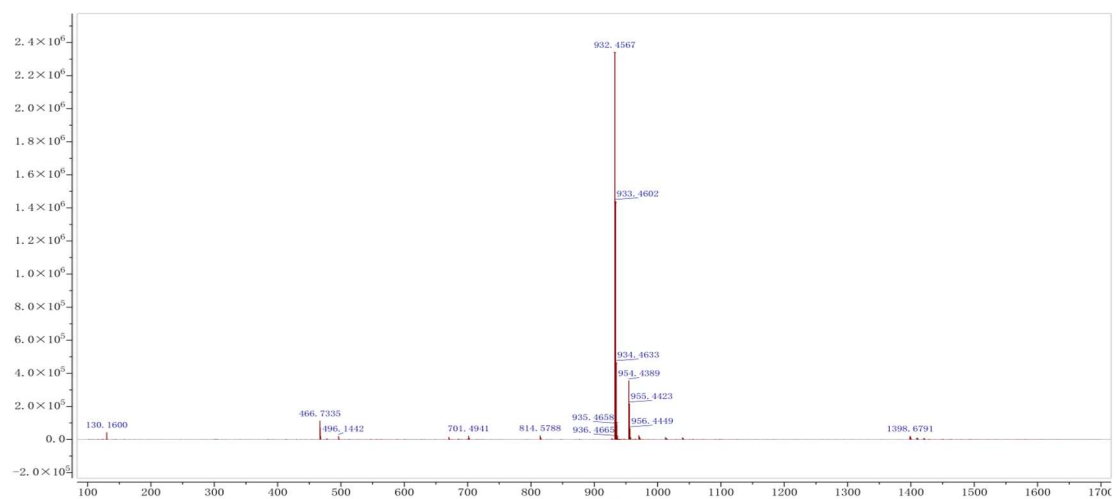

HRMS of B2-10

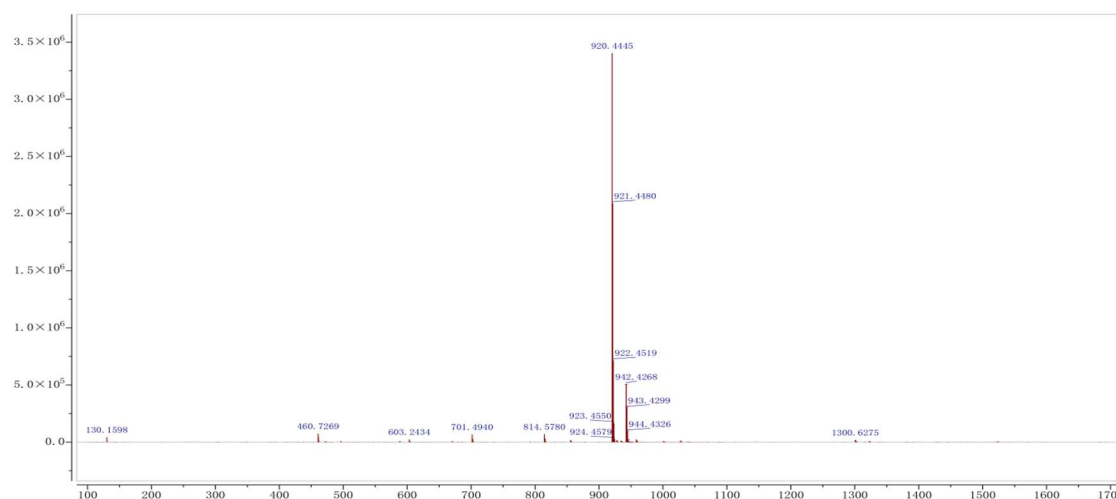

HRMS of B3

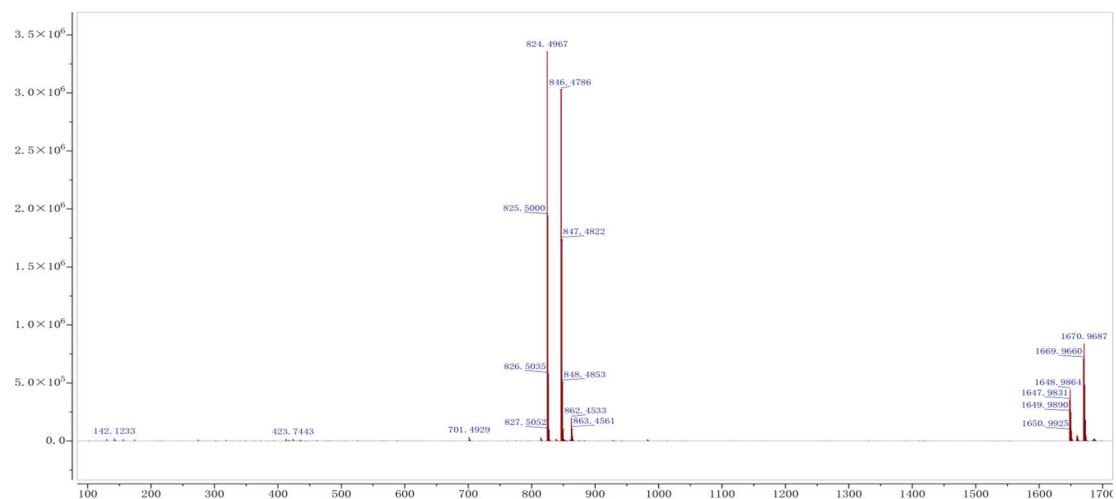

HRMS of B4

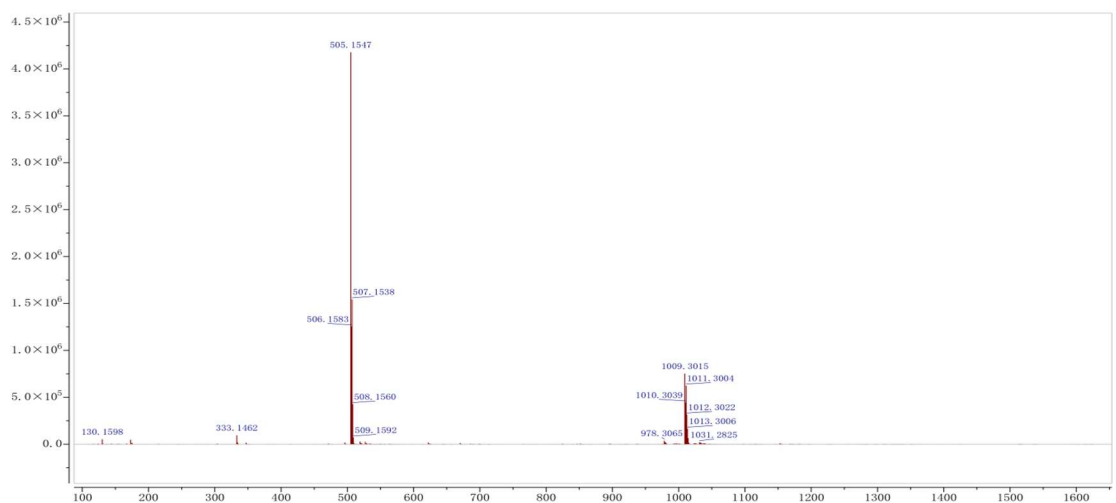

HRMS of C

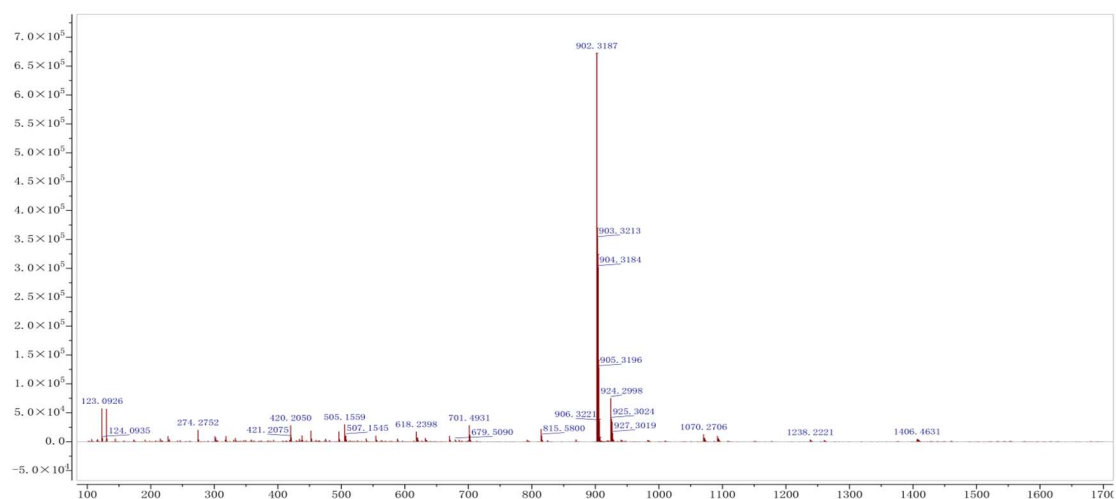

HRMS of C1

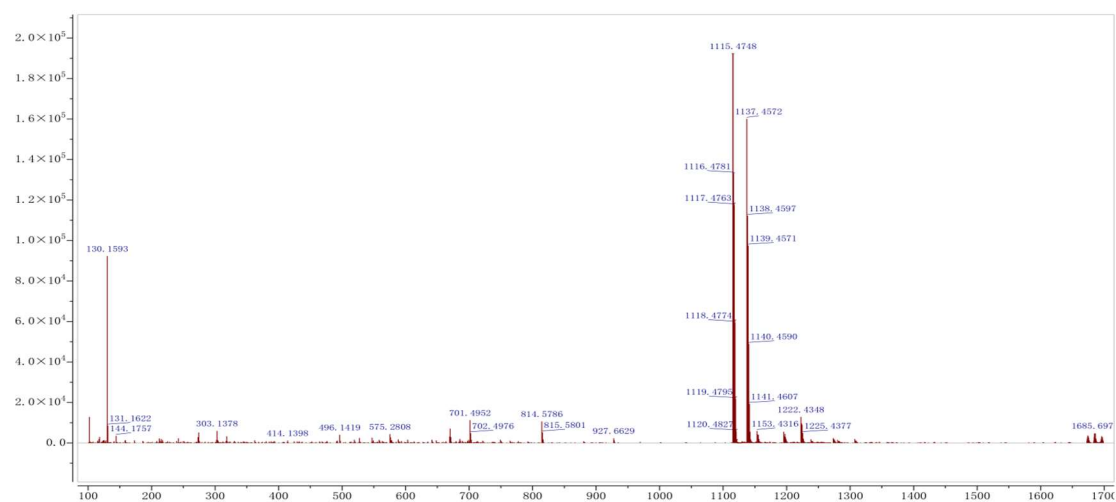

HRMS of C2

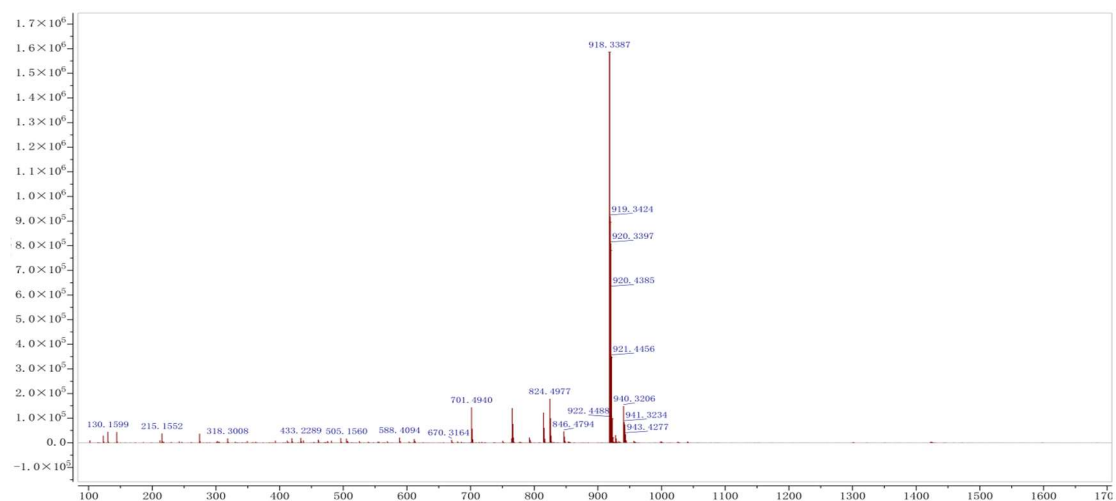

HRMS of C3

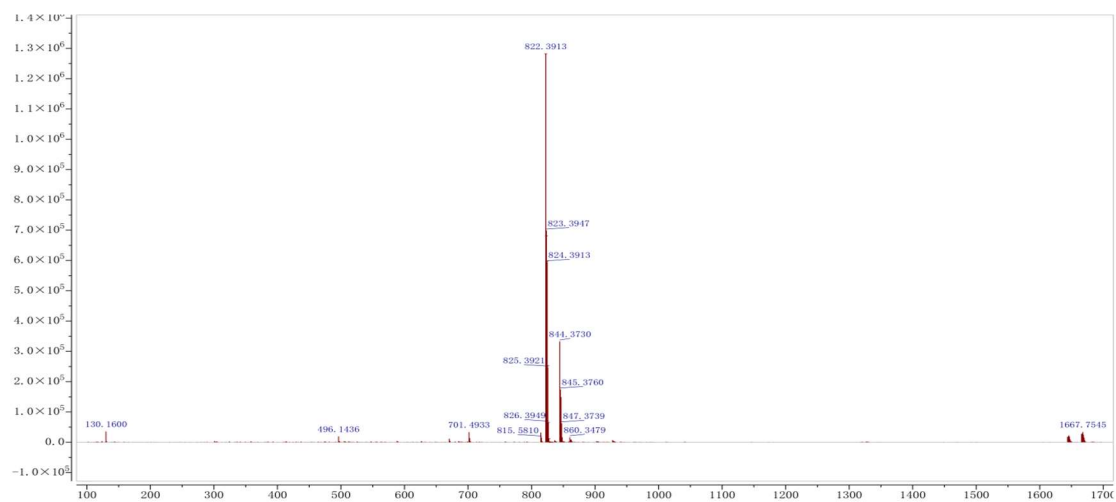

HRMS of C4

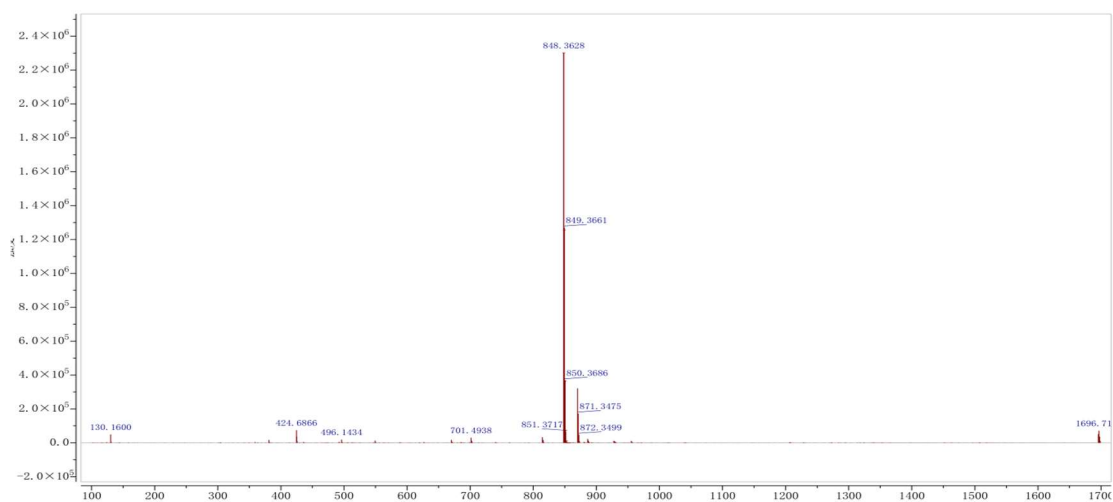

HRMS of **B1-4**

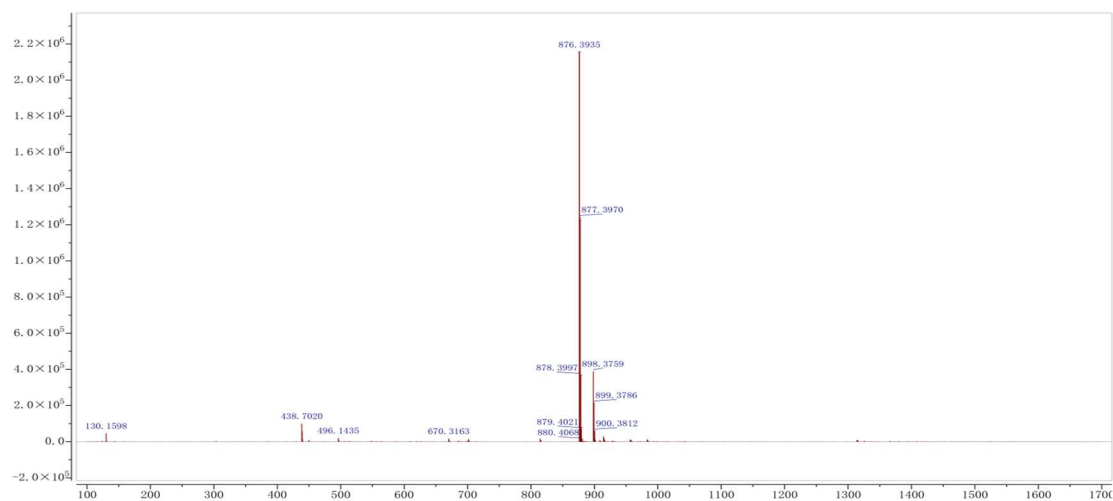

HRMS of **B1-6**

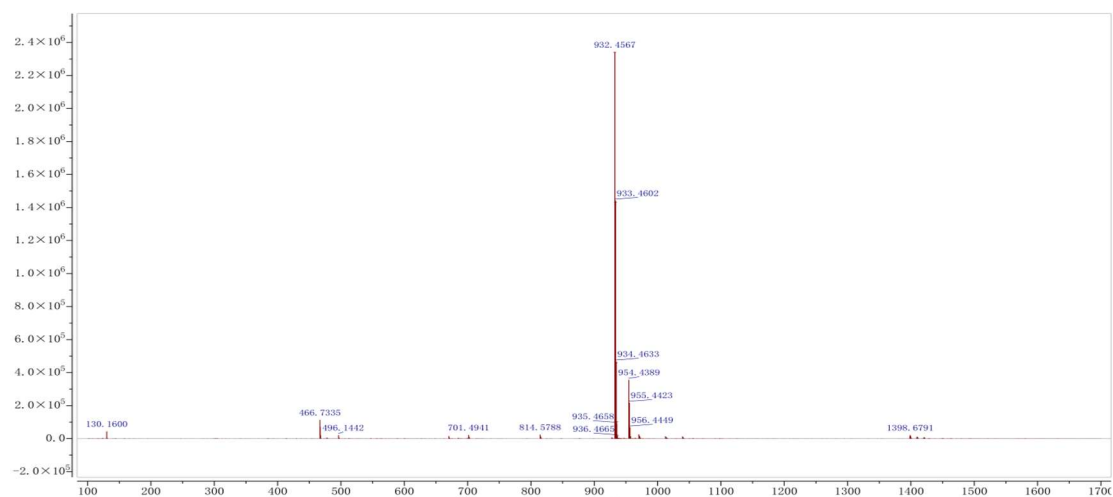

HRMS of **B1-10**

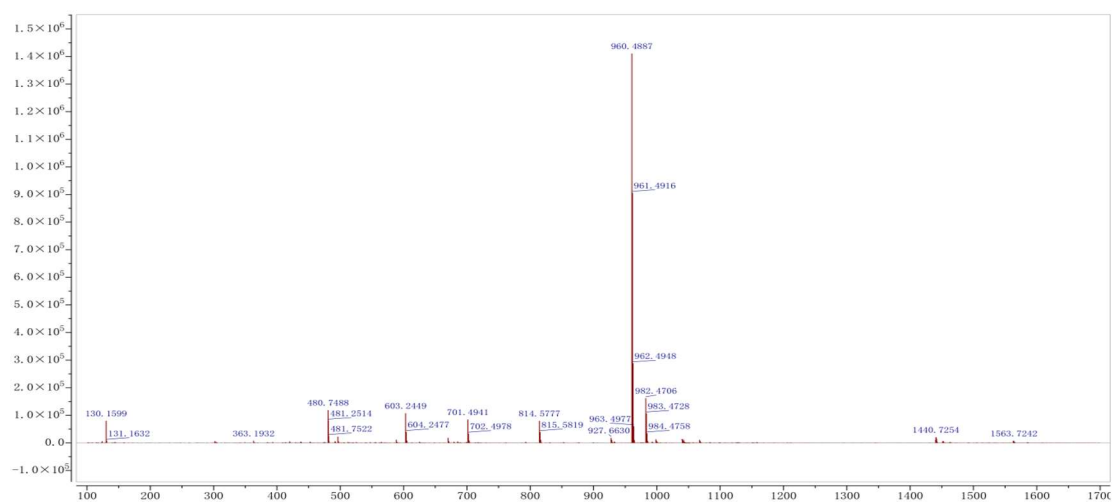

HRMS of B1-12

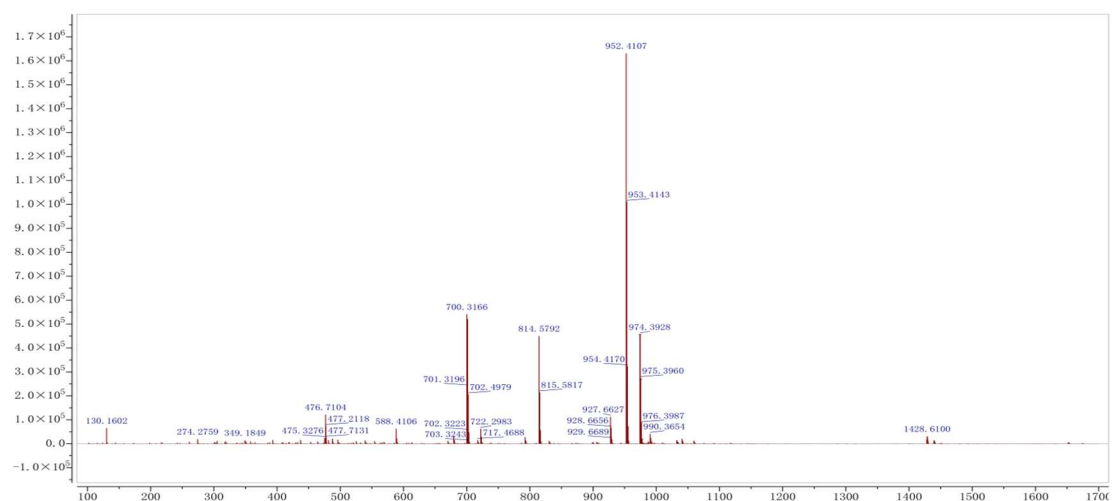

HRMS of B1-3P

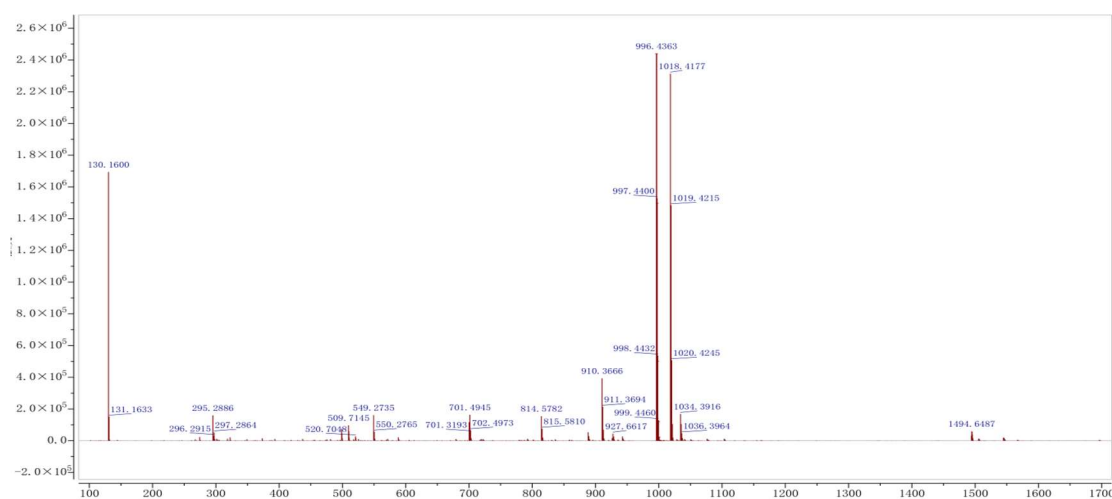

HRMS of B1-4P

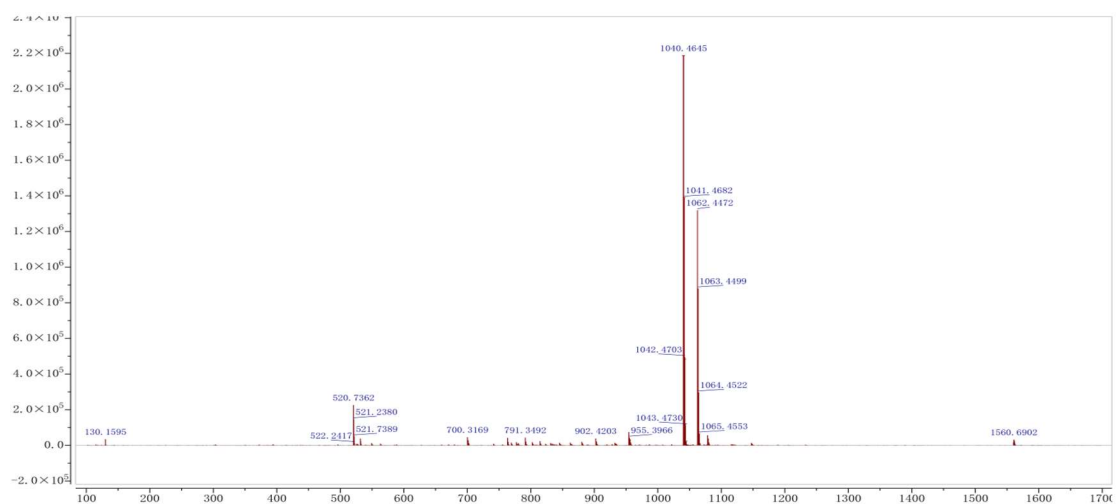

HRMS of **B1-5P**

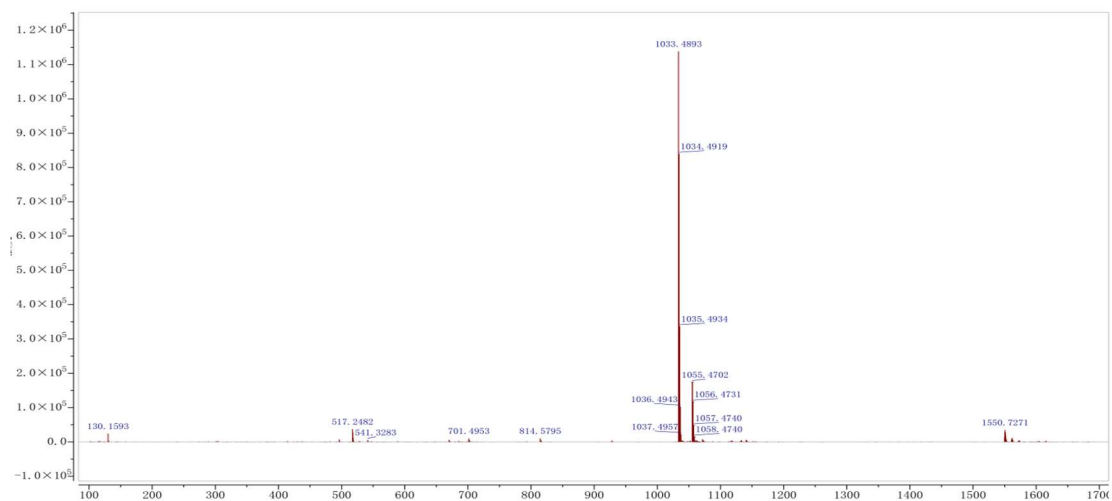

HRMS of **B2-4**

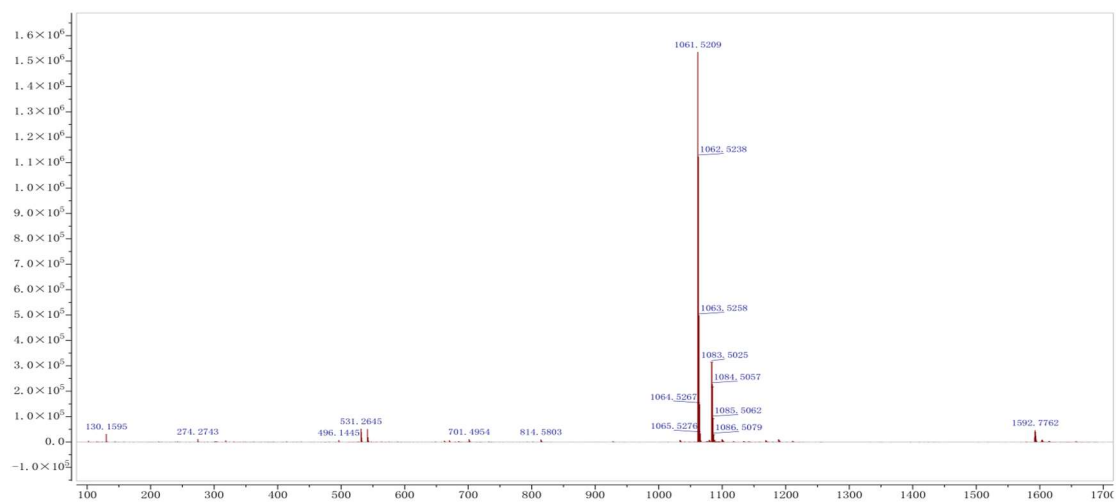

HRMS of **B2-6**

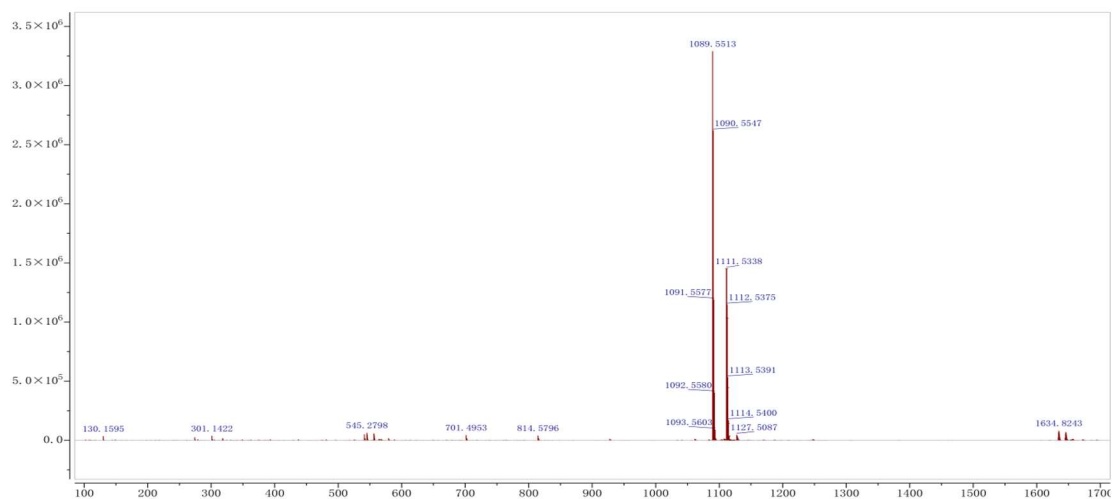

HRMS of **B2-8**

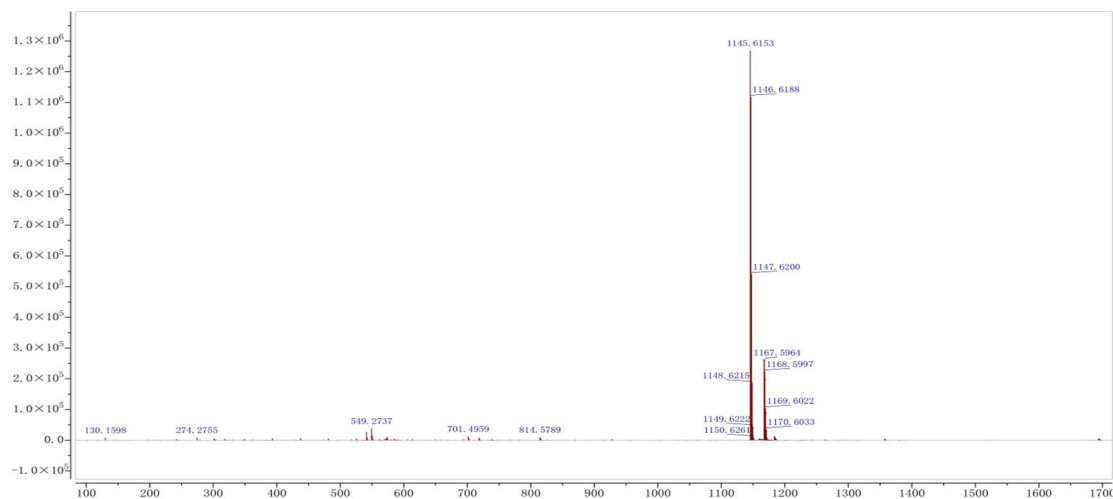

HRMS of **B2-12**

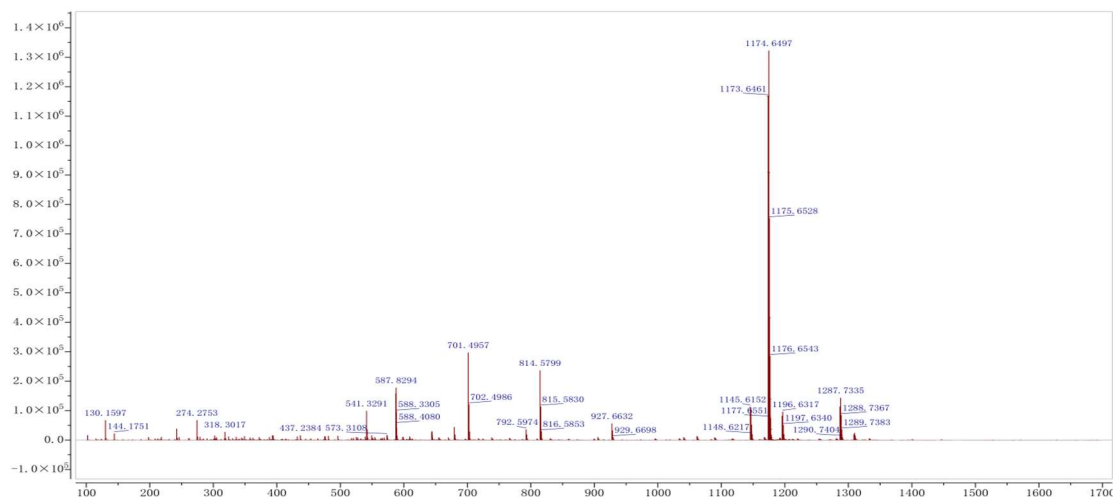

HRMS of **B2-14**

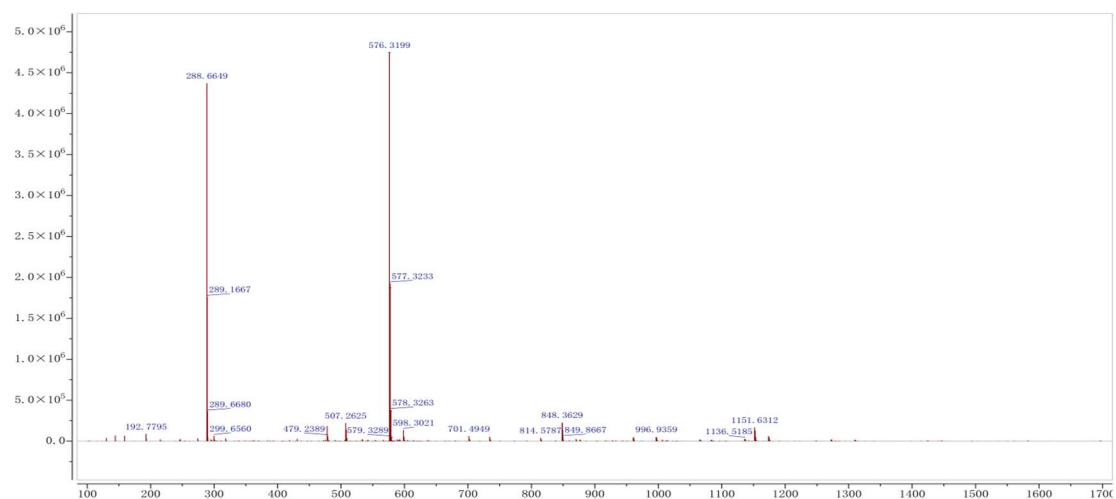

HRMS of **B-P**

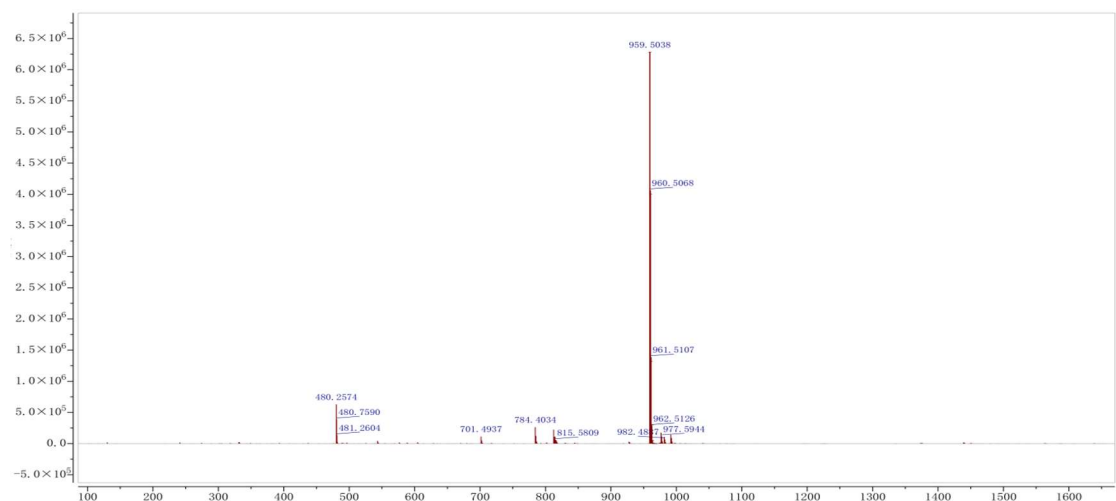

HRMS of **B1-10P**

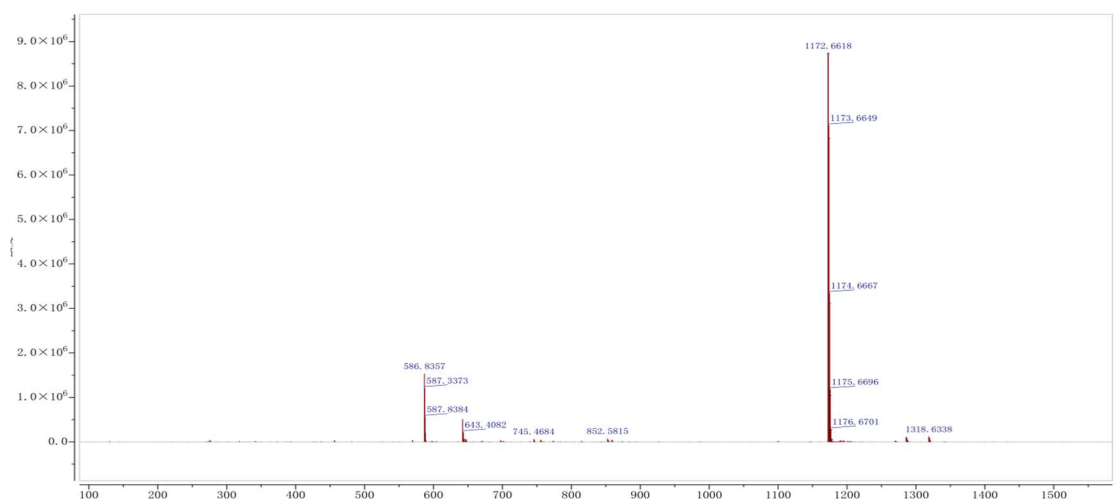

HRMS of **B2-12P**



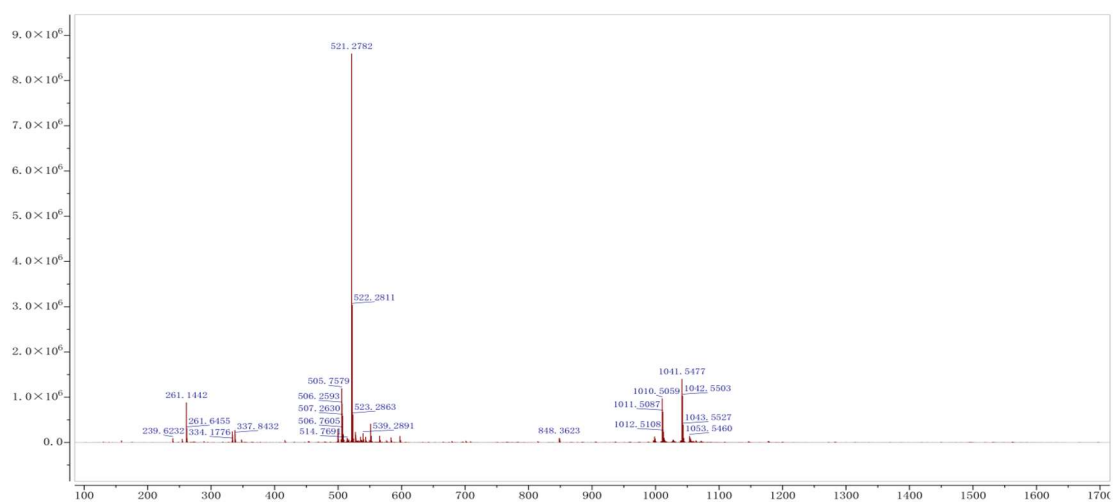

HRMS of **B-J**

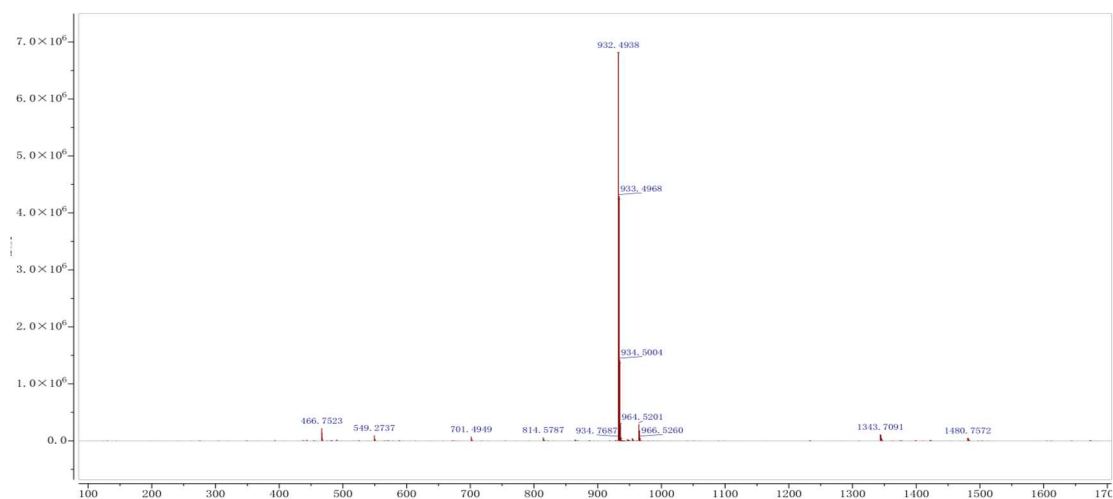

HRMS of **B1-10J**

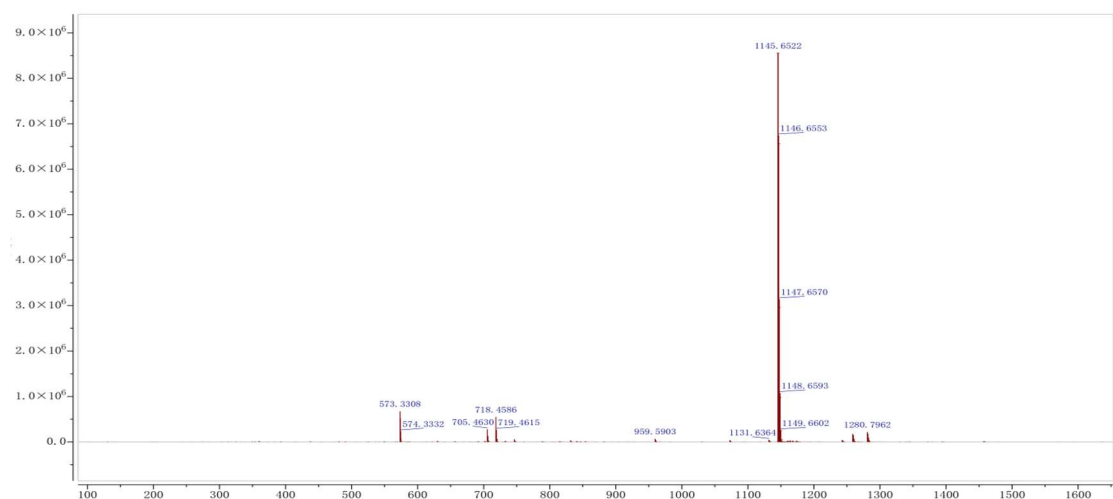

HRMS of **B2-12J**

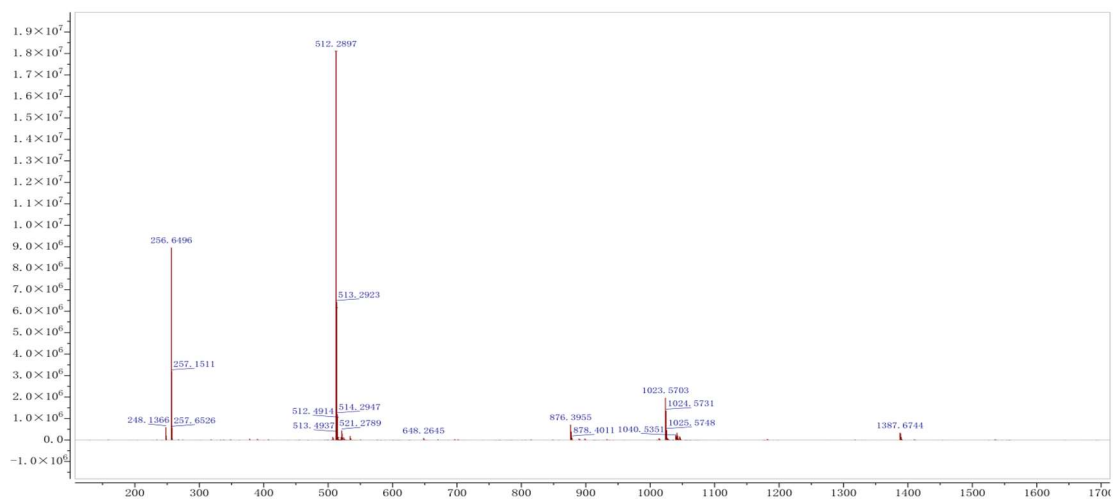

HRMS of **B-N**

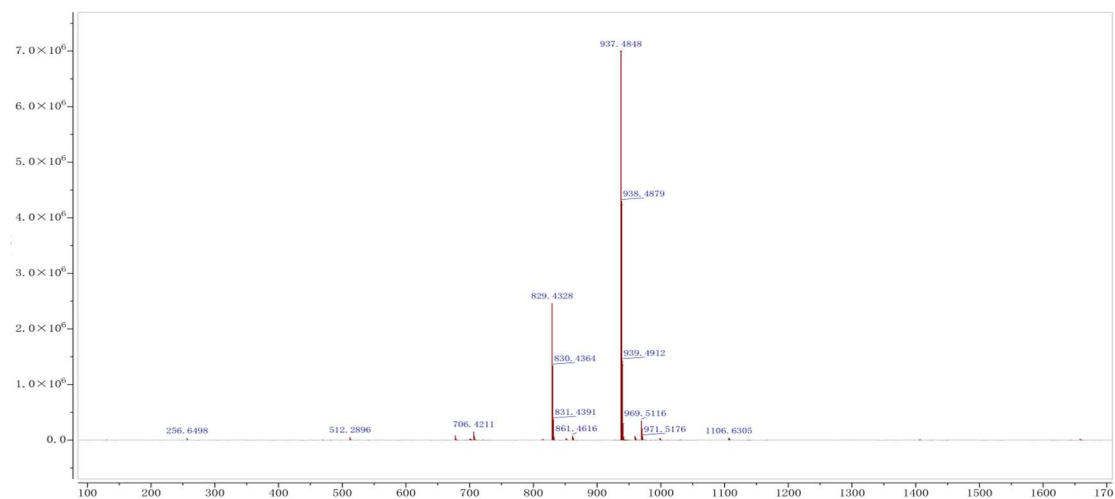

HRMS of **B1-10N**

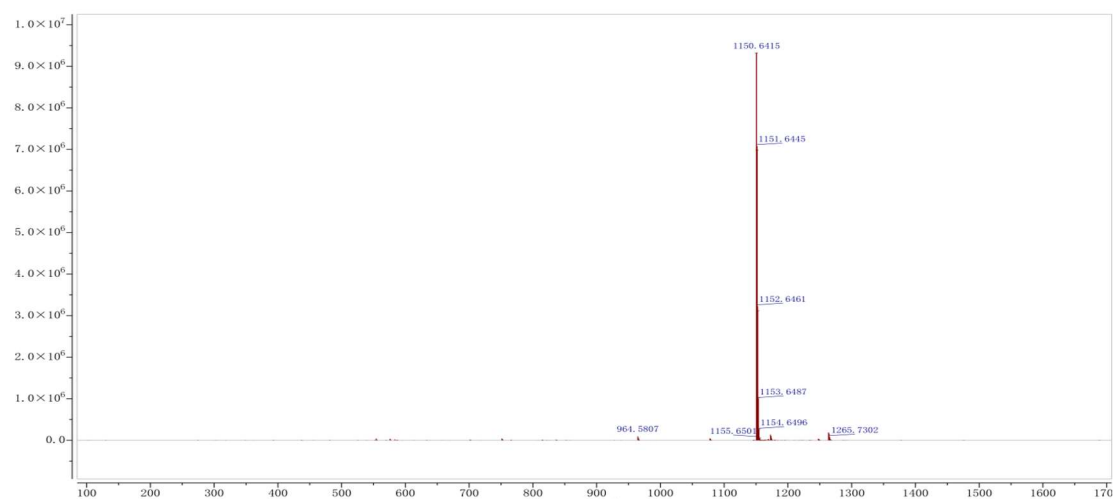

HRMS of **B2-12N**

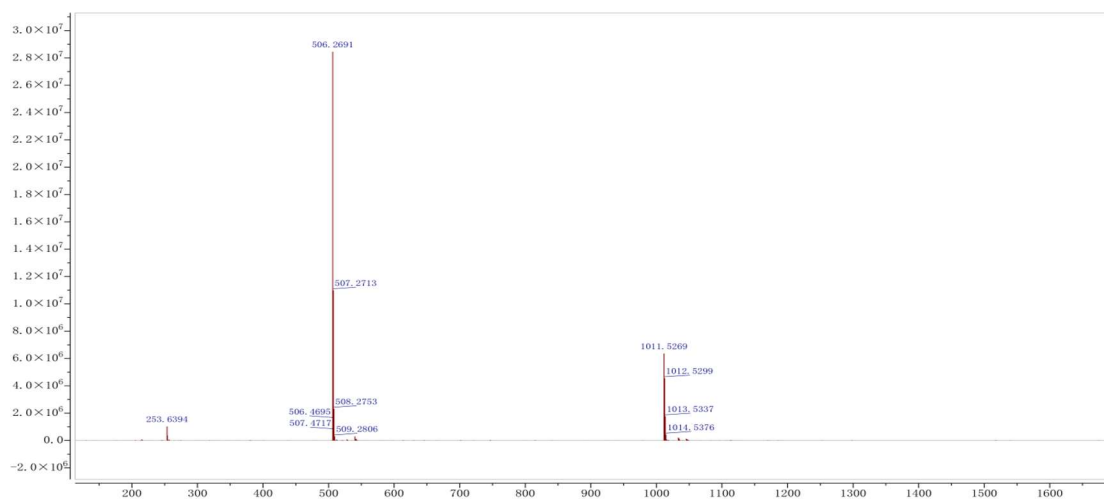

HRMS of **B-B**

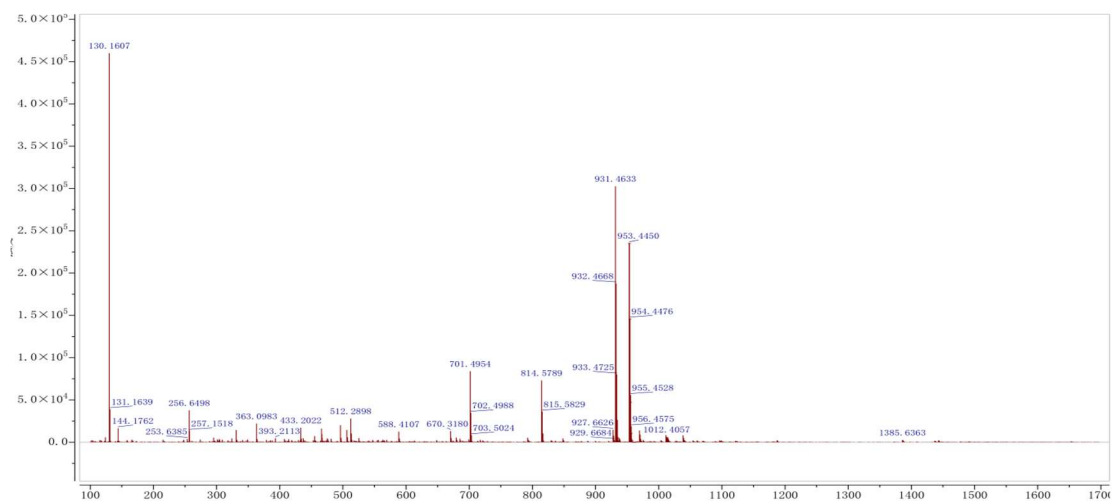

HRMS of **B1-10B**

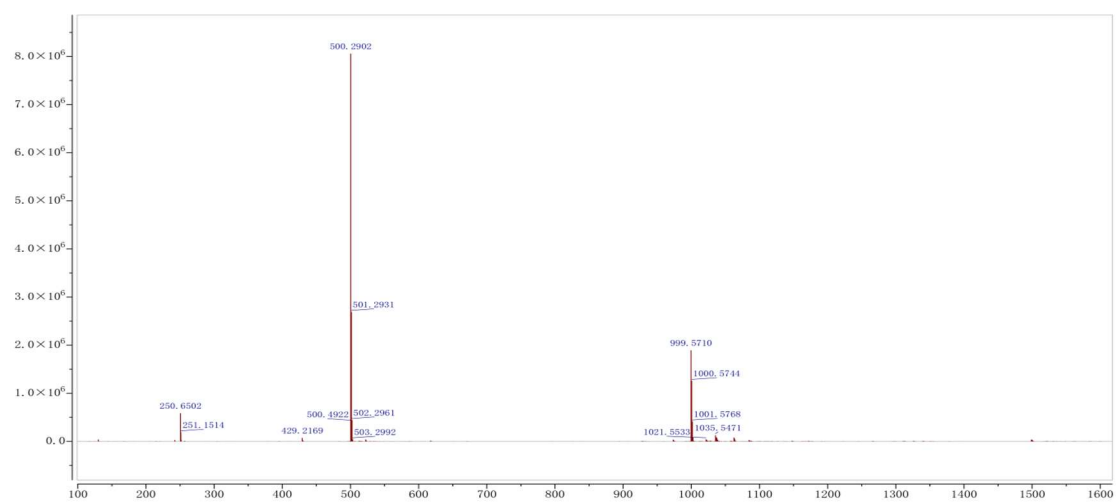

HRMS of **B-BZ**

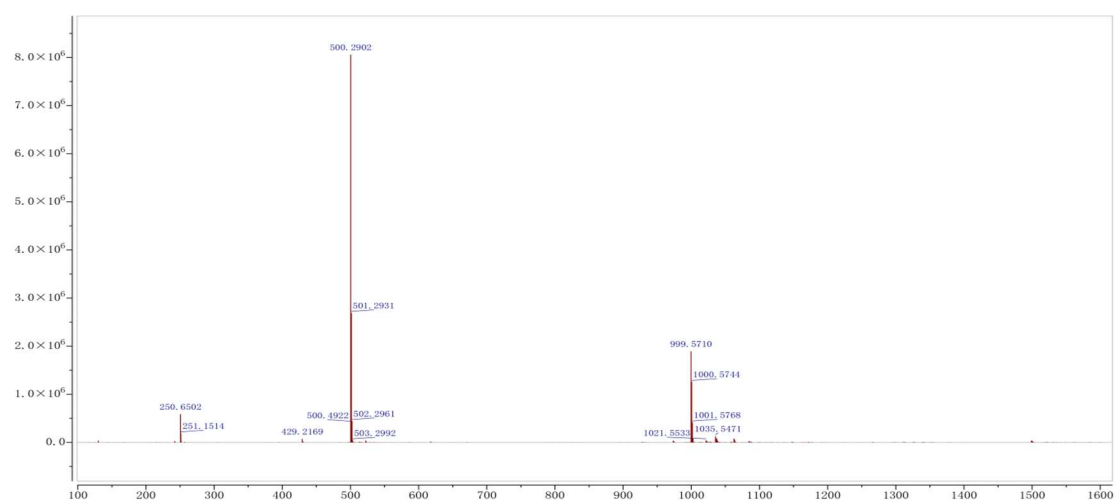

HRMS of **B1-10BZ**

## 7. HPLC

Gradient: 5% CH<sub>3</sub>CN to 95% CH<sub>3</sub>CN over 25 min at a flow rate of 1 mL/min.

Wavelength: 254 nm

| No. | Ret. Time(min) | Area%   |
|-----|----------------|---------|
| 1   | 2.263          | 0.1894  |
| 2   | 17.536         | 2.4889  |
| 3   | 18.362         | 97.1827 |
| 4   | 19.073         | 0.1390  |

Purity: 97.1827%

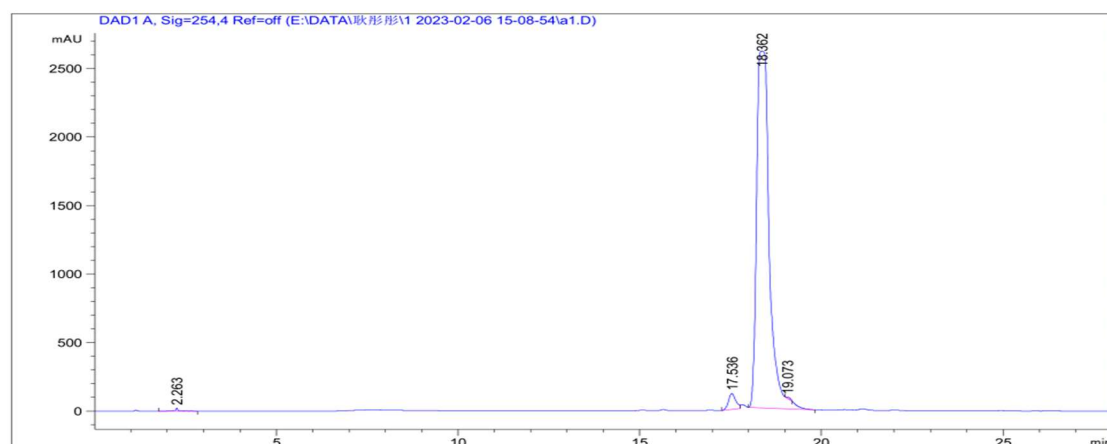

HPLC of **A1**

| No. | Ret. Time(min) | Area%   |
|-----|----------------|---------|
| 1   | 2.245          | 0.1893  |
| 2   | 14.774         | 0.5346  |
| 3   | 18.288         | 99.2761 |

Purity: 99.2761%

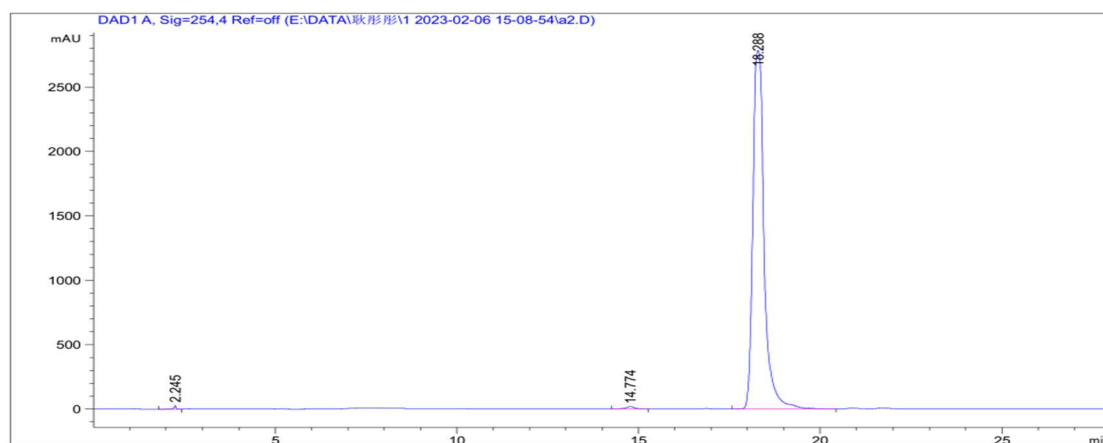

#### HPLC of A2

| No. | Ret. Time(min) | Area%   |
|-----|----------------|---------|
| 1   | 17.884         | 0.5775  |
| 2   | 18.722         | 0.7747  |
| 3   | 19.289         | 98.0328 |
| 4   | 23.633         | 0.6150  |

Purity: 98.0328%

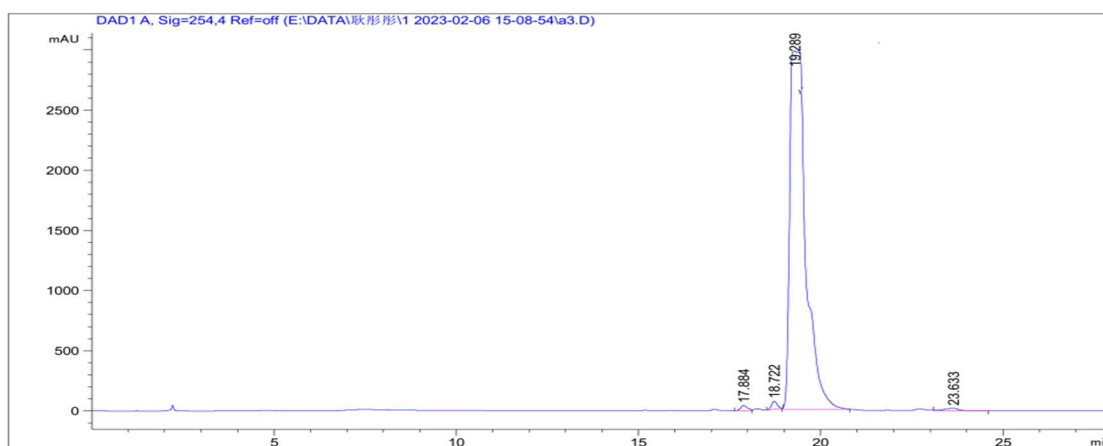

#### HPLC of A3

| No. | Ret. Time(min) | Area% |
|-----|----------------|-------|
|-----|----------------|-------|

|   |        |         |
|---|--------|---------|
| 1 | 18.873 | 0.2755  |
| 2 | 19.934 | 0.4753  |
| 3 | 21.350 | 99.2491 |

Purity: 99.2491%

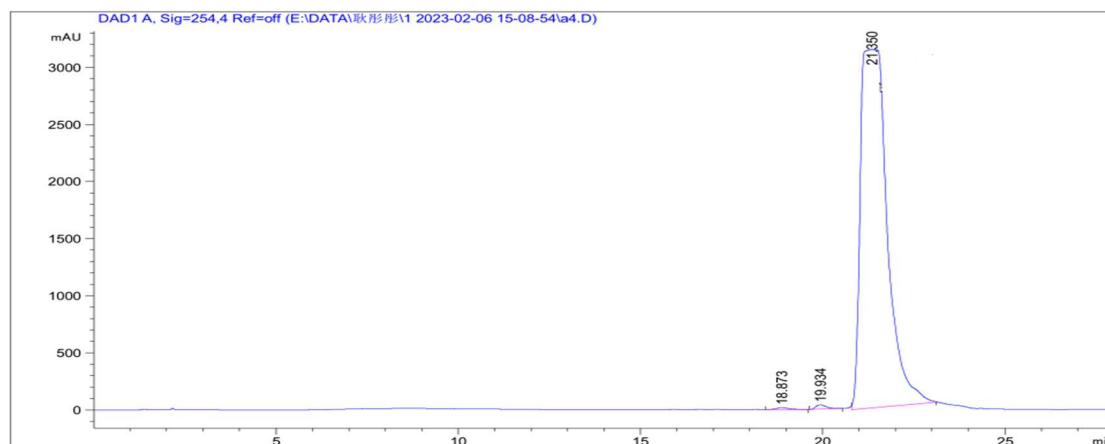

#### HPLC of A4

| No. | Ret. Time(min) | Area%   |
|-----|----------------|---------|
| 1   | 2.181          | 0.2409  |
| 2   | 17.668         | 99.0219 |
| 3   | 21.176         | 0.7372  |

Purity: 99.0219%

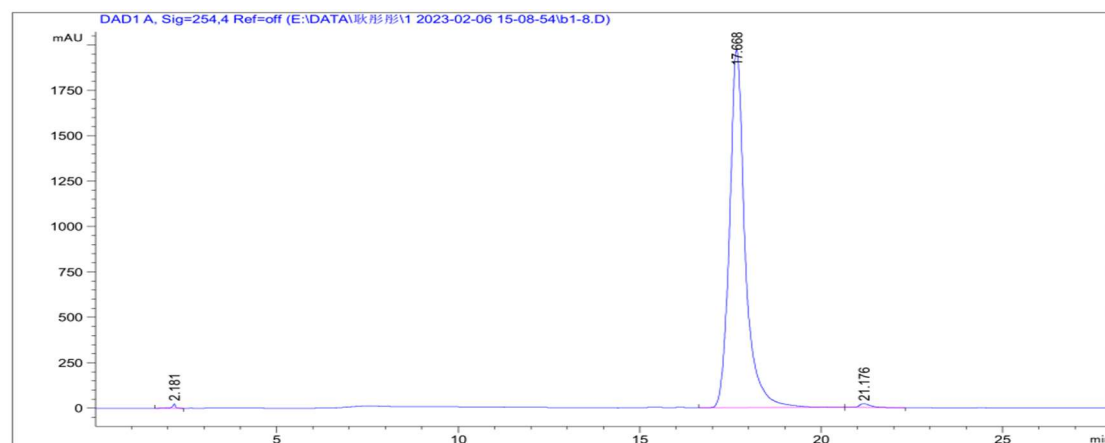

#### HPLC of B1-8

| No. | Ret. Time(min) | Area%  |
|-----|----------------|--------|
| 1   | 2.180          | 0.1924 |
| 2   | 14.989         | 0.3818 |

|   |        |         |
|---|--------|---------|
| 3 | 18.010 | 99.4258 |
|---|--------|---------|

Purity: 99.4258%

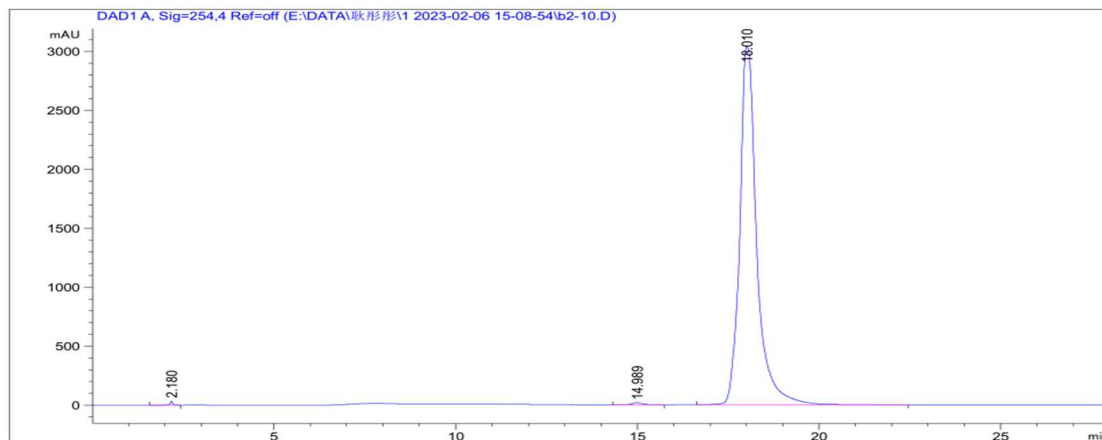

#### HPLC of B2-10

| No. | Ret. Time(min) | Area%   |
|-----|----------------|---------|
| 1   | 15.486         | 0.2335  |
| 2   | 17.046         | 0.7765  |
| 3   | 18.487         | 98.0690 |
| 4   | 22.779         | 0.9211  |

Purity: 98.0690%

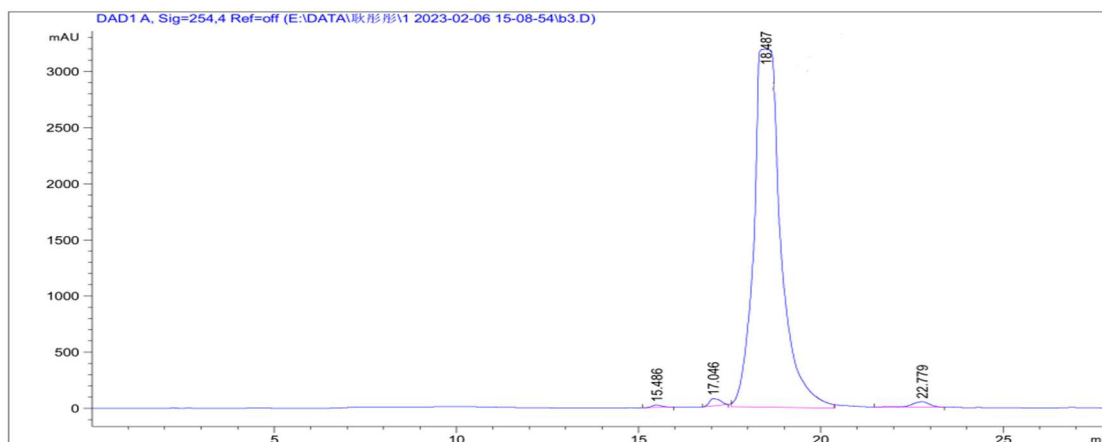

#### HPLC of B3

| No. | Ret. Time(min) | Area%  |
|-----|----------------|--------|
| 1   | 2.221          | 0.1742 |
| 2   | 15.384         | 0.1648 |
| 3   | 17.996         | 0.2492 |

|   |        |         |
|---|--------|---------|
| 4 | 20.933 | 99.4118 |
|---|--------|---------|

Purity: 99.4118%

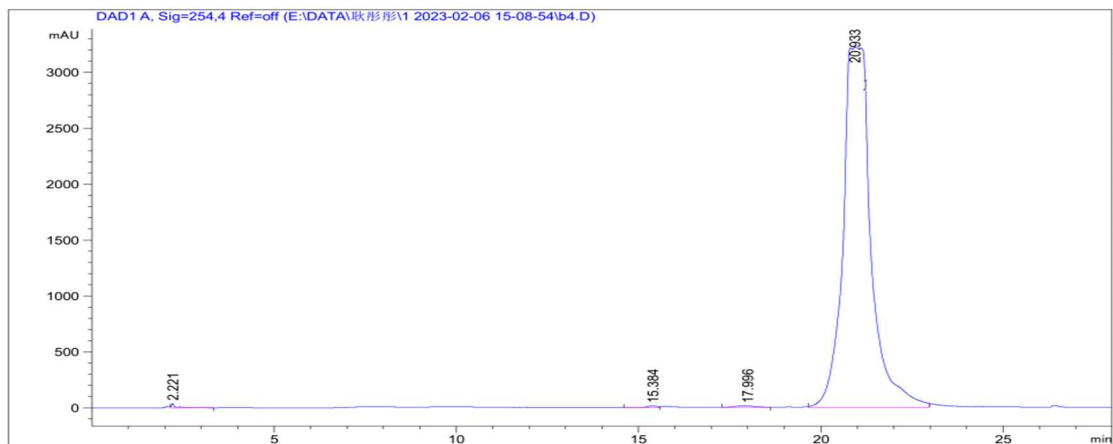

#### HPLC of B4

| No. | Ret. Time(min) | Area%    |
|-----|----------------|----------|
| 1   | 2.221          | 100.0000 |

Purity: 100.0000%

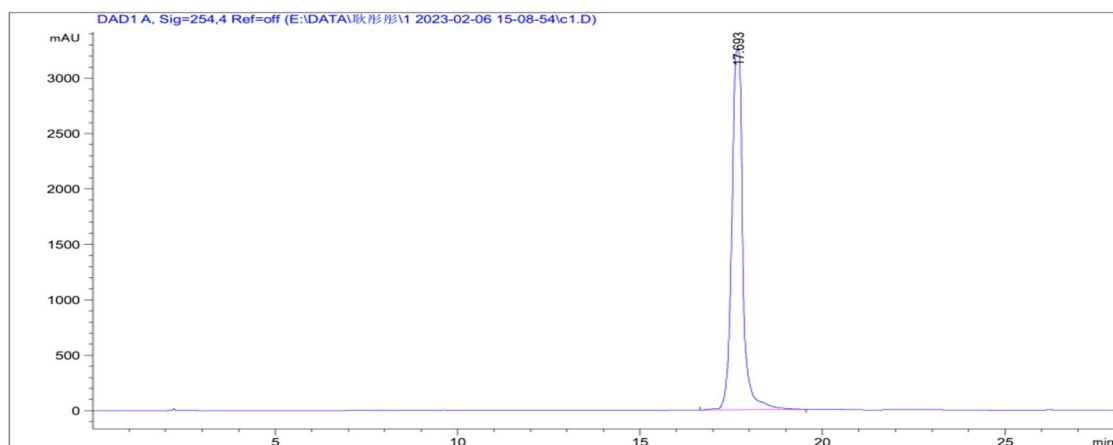

#### HPLC of C1

| No. | Ret. Time(min) | Area%   |
|-----|----------------|---------|
| 1   | 14.891         | 0.2886  |
| 2   | 15.226         | 0.4499  |
| 3   | 17.984         | 99.2615 |

Purity: 99.2615%



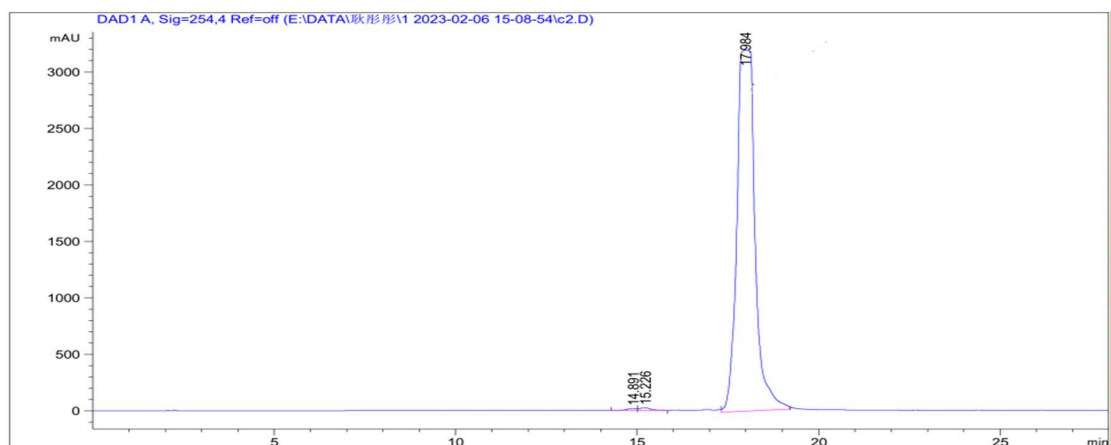

### HPLC of C2

| No. | Ret. Time(min) | Area%   |
|-----|----------------|---------|
| 1   | 16.352         | 0.1951  |
| 2   | 17.309         | 0.1237  |
| 3   | 18.594         | 99.6813 |

Purity: 99.6813%

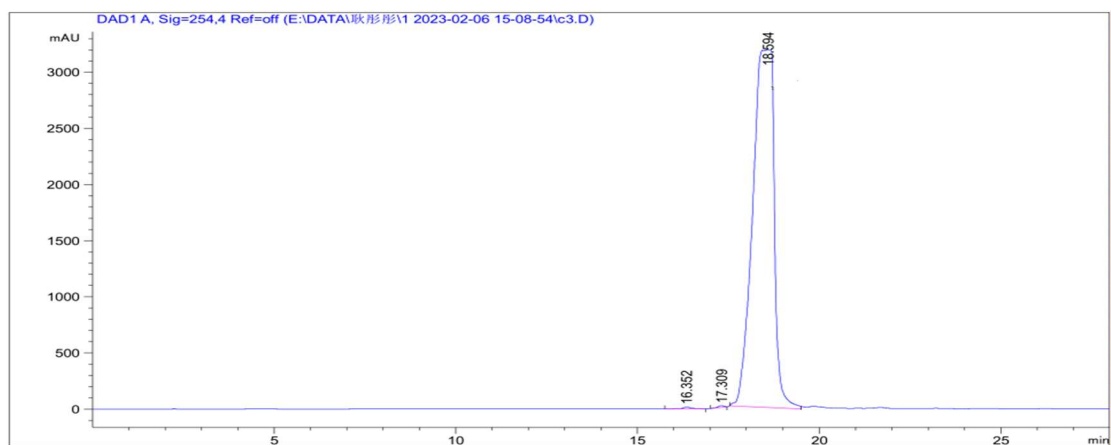

### HPLC of C3

| No. | Ret. Time(min) | Area%   |
|-----|----------------|---------|
| 1   | 17.422         | 0.2888  |
| 2   | 20.331         | 99.7112 |

Purity: 99.7112%

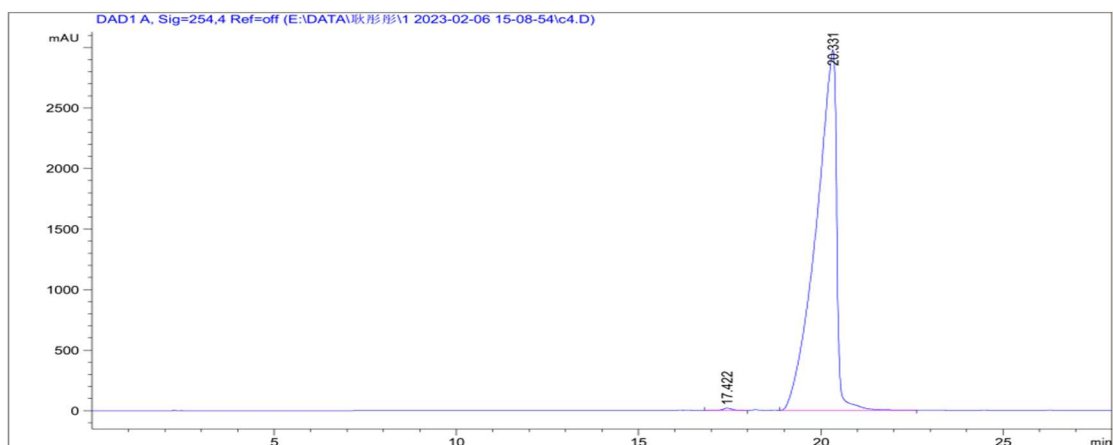

#### HPLC of C4

| No. | Ret. Time(min) | Area%   |
|-----|----------------|---------|
| 1   | 12.217         | 95.7649 |
| 2   | 22.833         | 4.2351  |

Purity: 95.7649%

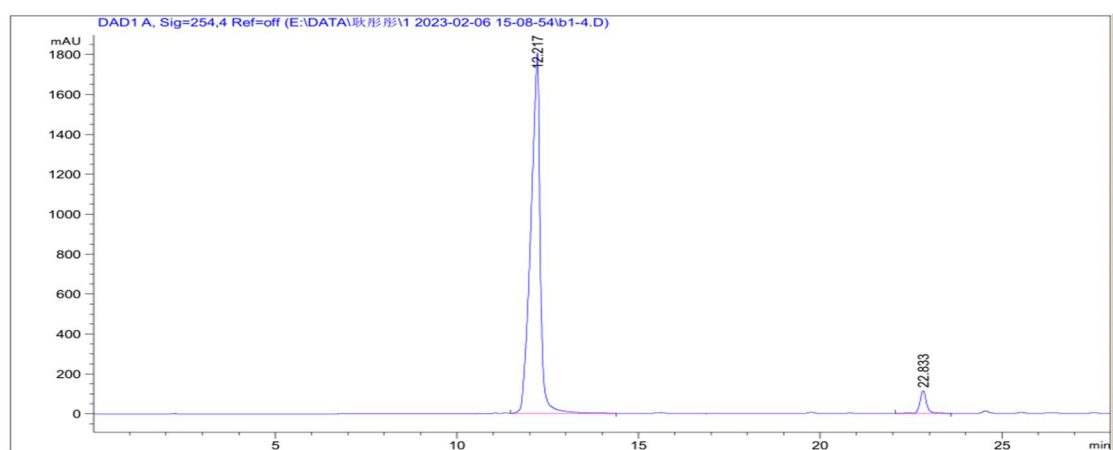

#### HPLC of B1-4

| No. | Ret. Time(min) | Area%   |
|-----|----------------|---------|
| 1   | 12.848         | 95.3459 |
| 2   | 22.843         | 4.2385  |
| 3   | 24.561         | 0.4156  |

Purity: 95.3459%

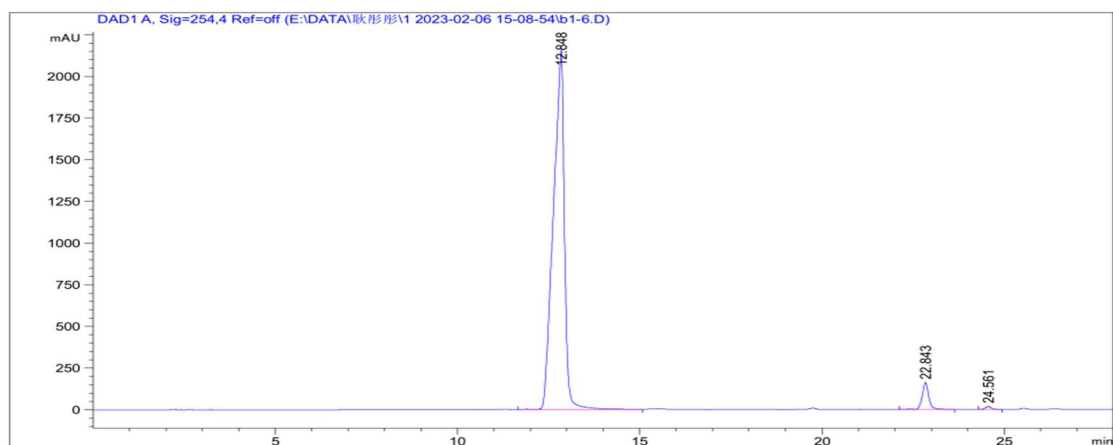

### HPLC of **B1-6**

| No. | Ret. Time(min) | Area%   |
|-----|----------------|---------|
| 1   | 15.044         | 95.1976 |
| 2   | 22.856         | 4.8024  |

Purity: 95.1976%

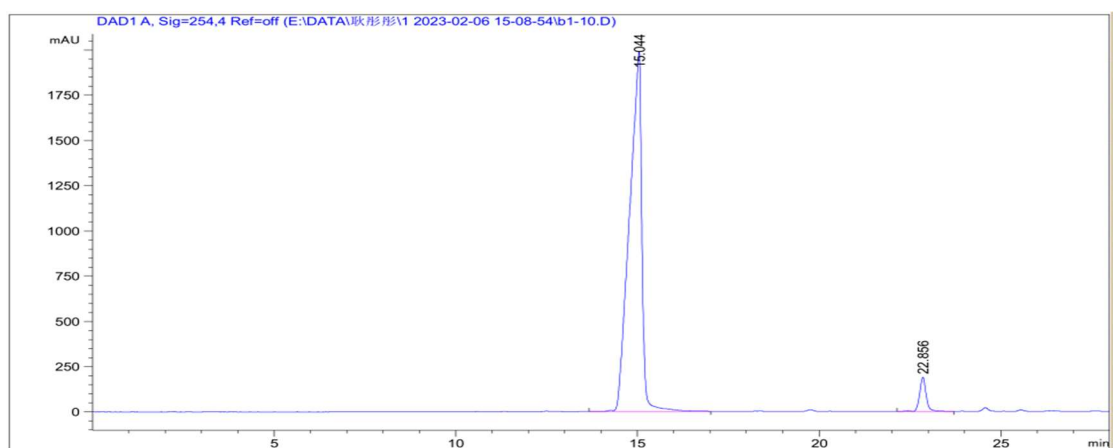

### HPLC of **B1-10**

| No. | Ret. Time(min) | Area%   |
|-----|----------------|---------|
| 1   | 16.121         | 95.0166 |
| 2   | 22.841         | 4.9834  |

Purity: 95.0166%

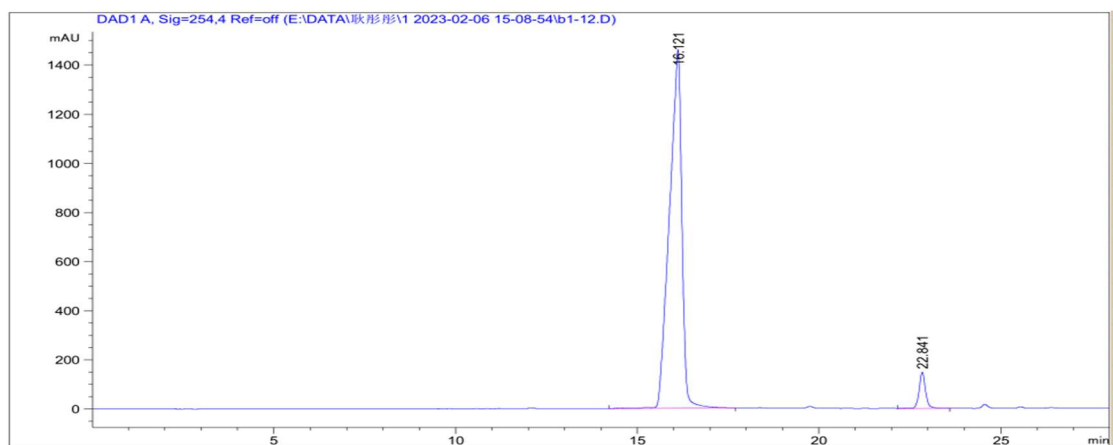

### HPLC of B1-12

| No. | Ret. Time(min) | Area%  |
|-----|----------------|--------|
| 1   | 10.846         | 3.361  |
| 2   | 11.192         | 95.950 |
| 3   | 21.645         | 0.689  |

Purity: 95.950%

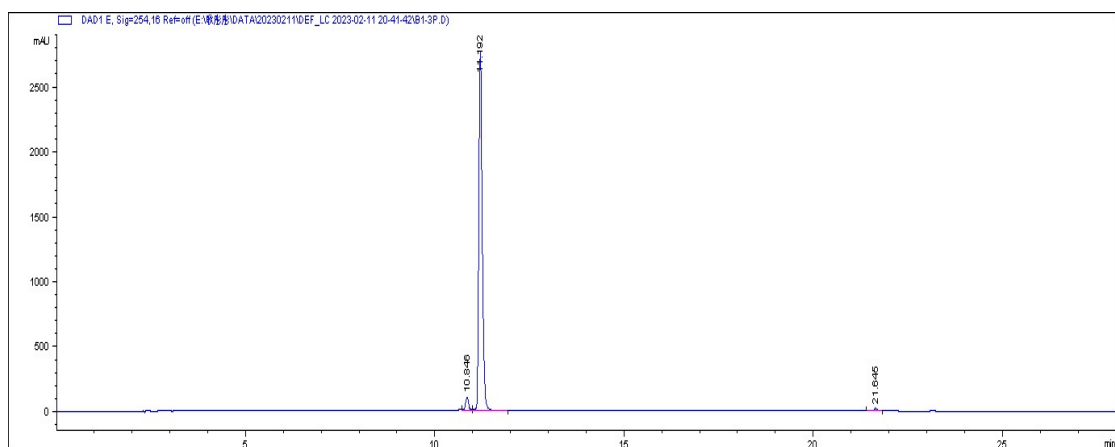

### HPLC of B1-3P

| No. | Ret. Time(min) | Area%  |
|-----|----------------|--------|
| 1   | 10.844         | 1.030  |
| 2   | 11.396         | 98.219 |
| 3   | 21.639         | 0.751  |

Purity: 98.219%

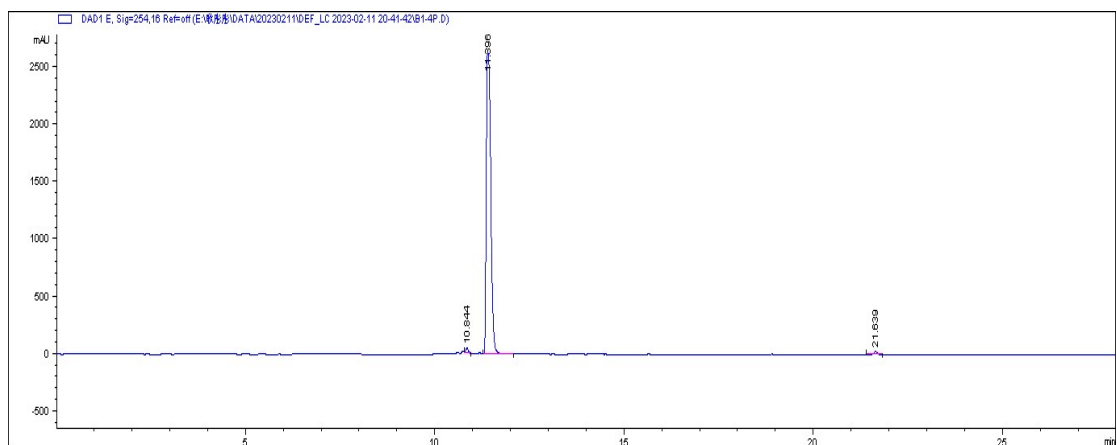

### HPLC of B1-4P

| No. | Ret. Time(min) | Area%   |
|-----|----------------|---------|
| 1   | 10.950         | 1.2848  |
| 2   | 11.840         | 2.1462  |
| 3   | 12.556         | 96.5690 |

Purity: 96.5690%

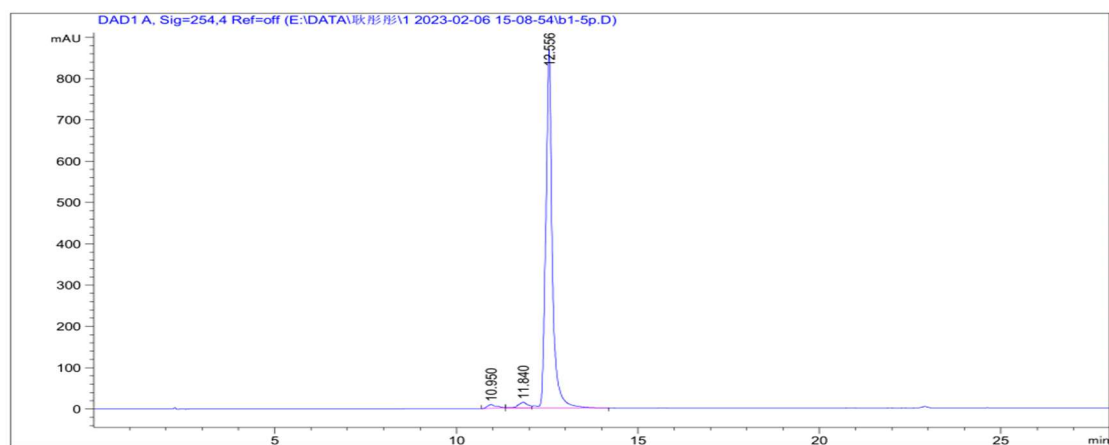

### HPLC of B1-5P

| No. | Ret. Time(min) | Area%    |
|-----|----------------|----------|
| 1   | 13.492         | 100.0000 |

Purity: 100.0000%

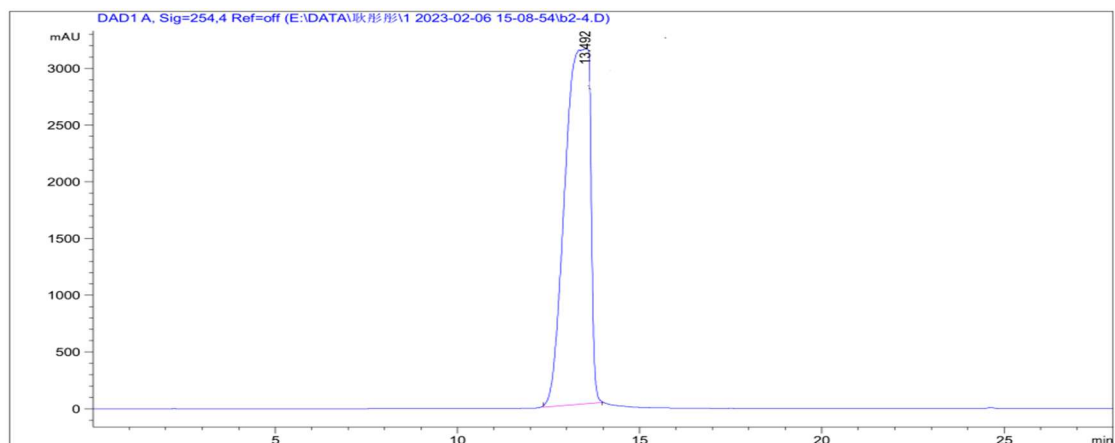

HPLC of **B2-4**

| No. | Ret. Time(min) | Area%    |
|-----|----------------|----------|
| 1   | 13.462         | 100.0000 |

Purity: 100.0000%

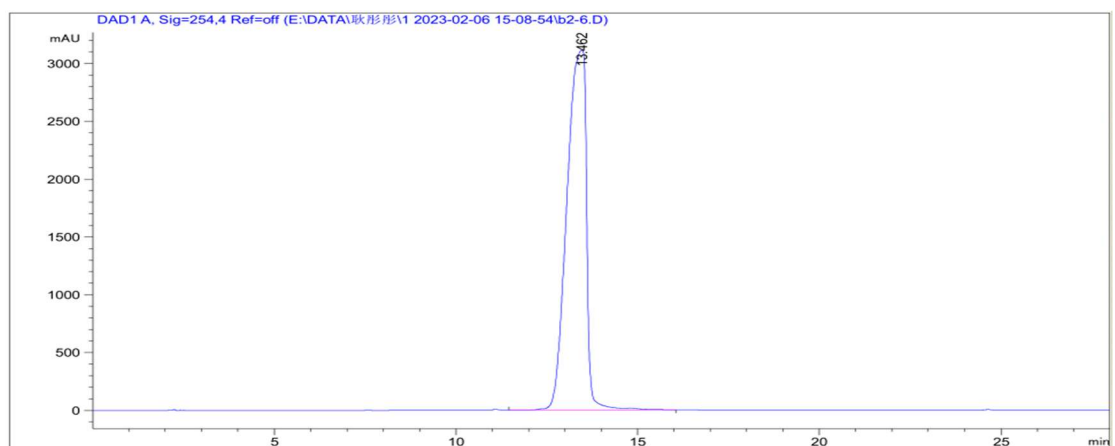

HPLC of **B2-6**

| No. | Ret. Time(min) | Area%   |
|-----|----------------|---------|
| 1   | 13.4983        | 99.2071 |
| 2   | 15.660         | 0.7929  |

Purity: 99.2071%

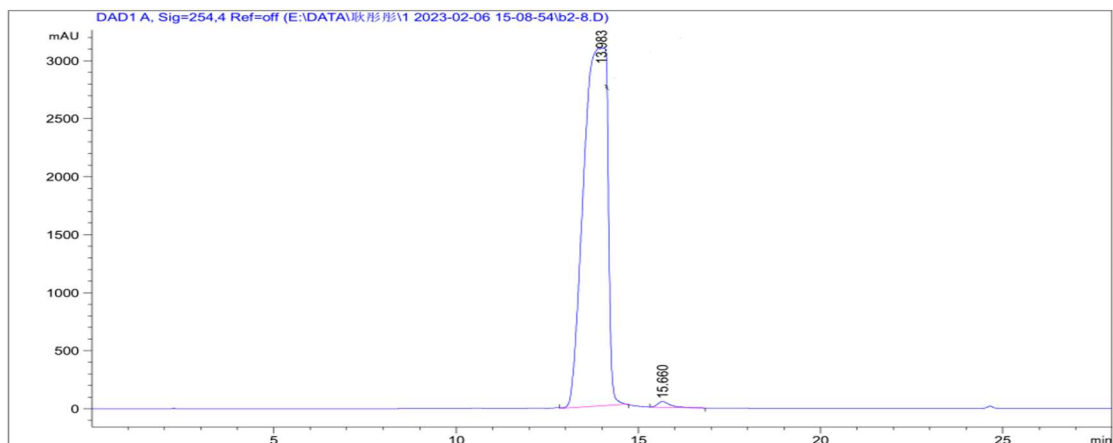

### HPLC of **B2-8**

| No. | Ret. Time(min) | Area%   |
|-----|----------------|---------|
| 1   | 10.825         | 1.5374  |
| 2   | 14.917         | 96.8397 |
| 3   | 16.181         | 0.5372  |
| 4   | 18.026         | 1.0858  |

Purity: 96.8397%

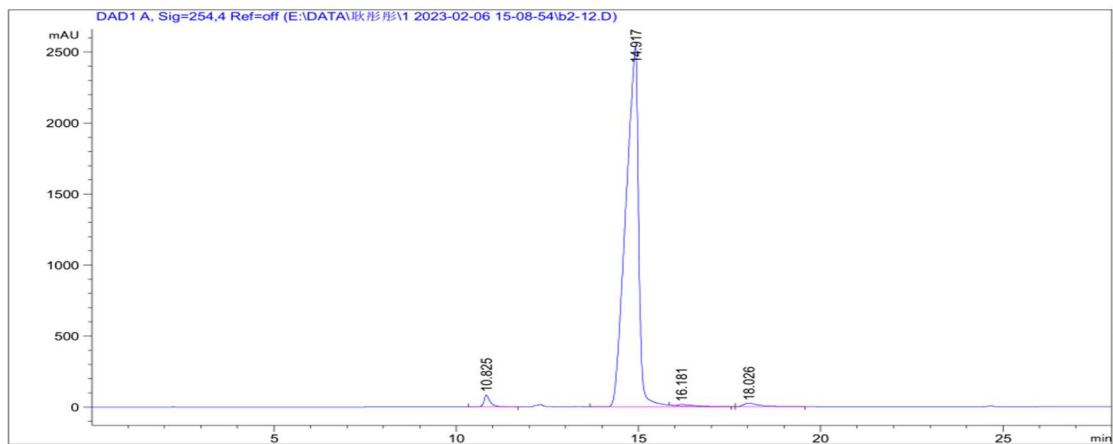

### HPLC of **B2-12**

| No. | Ret. Time(min) | Area%   |
|-----|----------------|---------|
| 1   | 10.820         | 1.6046  |
| 2   | 12.291         | 0.3296  |
| 3   | 15.056         | 96.2597 |
| 4   | 16.187         | 0.6004  |
| 5   | 18.017         | 1.2057  |

Purity: 96.2597%

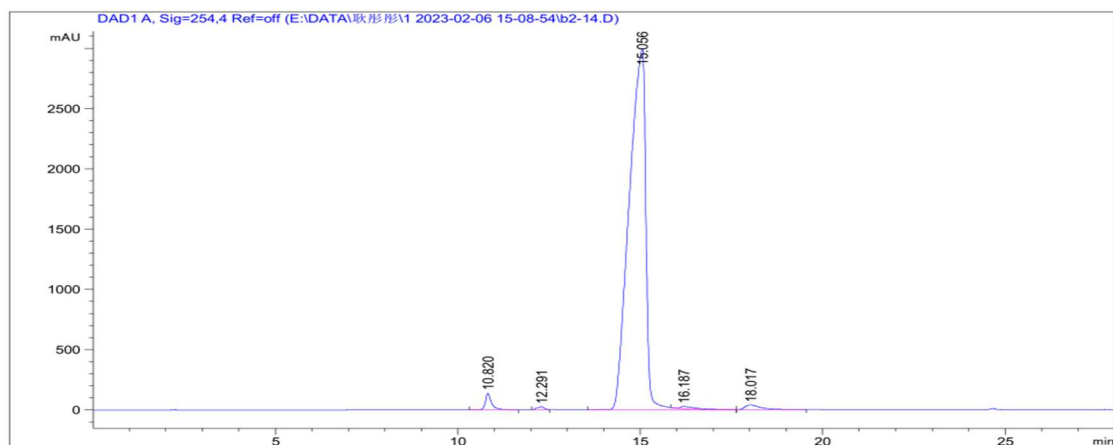

#### HPLC of B2-14

| No. | Ret. Time(min) | Area%   |
|-----|----------------|---------|
| 1   | 10.204         | 0.2198  |
| 2   | 12.652         | 98.8697 |
| 3   | 14.717         | 0.9105  |

Purity: 98.8697%

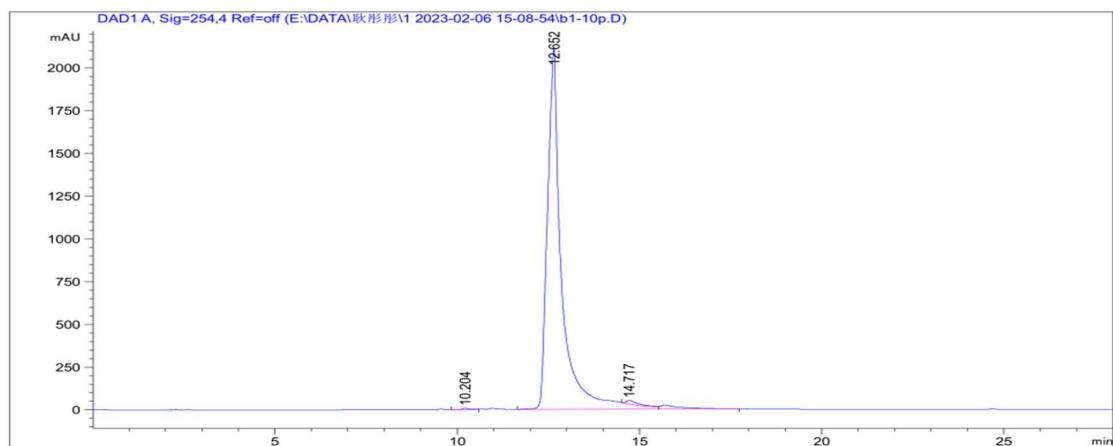

#### HPLC of B1-10P

| No. | Ret. Time(min) | Area%   |
|-----|----------------|---------|
| 1   | 9.429          | 0.6530  |
| 2   | 9.596          | 0.9906  |
| 3   | 12.382         | 95.3404 |
| 4   | 13.451         | 3.0160  |

Purity: 95.3404%



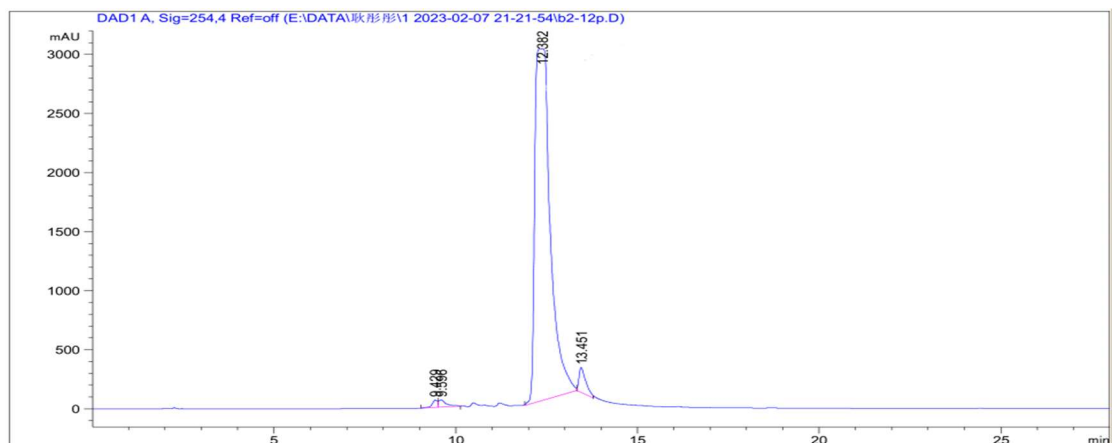

### HPLC of B2-12P

| No. | Ret. Time(min) | Area%   |
|-----|----------------|---------|
| 1   | 13.622         | 99.5943 |
| 2   | 22.939         | 0.4057  |

Purity: 99.5943%

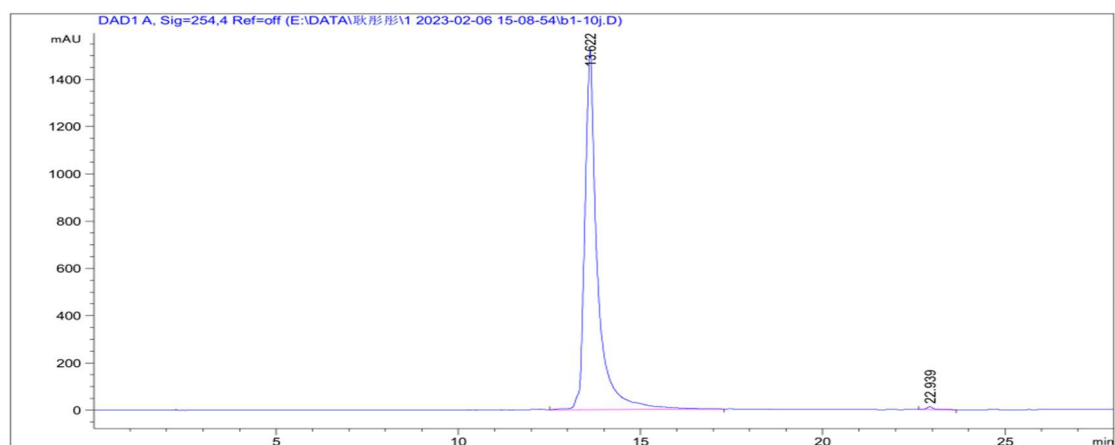

### HPLC of B1-10J

| No. | Ret. Time(min) | Area%  |
|-----|----------------|--------|
| 1   | 11.368         | 1.544  |
| 2   | 12.359         | 97.989 |
| 3   | 15.382         | 0.467  |

Purity: 97.989%



### HPLC of **B2-12J**

| No. | Ret. Time(min) | Area%   |
|-----|----------------|---------|
| 1   | 12.169         | 0.2445  |
| 2   | 12.754         | 0.6603  |
| 3   | 13.604         | 99.0951 |

Purity: 99.0951%

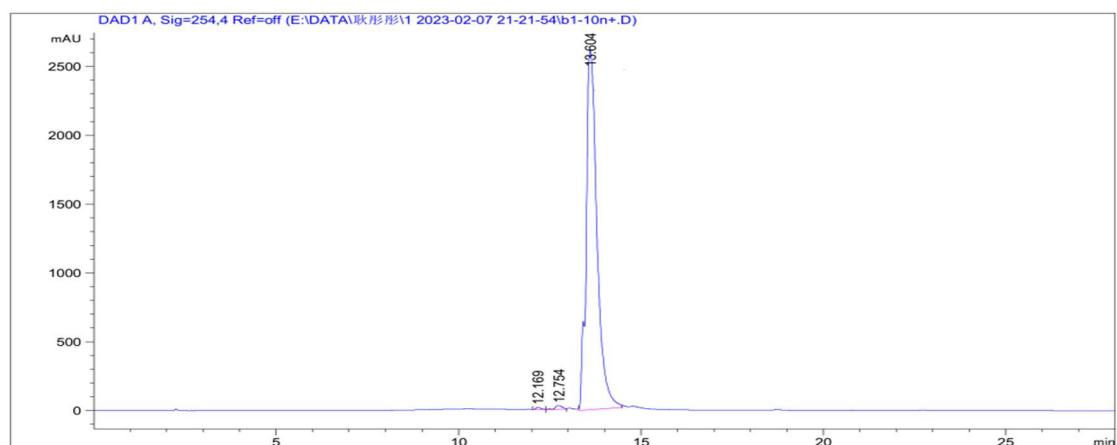

### HPLC of **B1-10N**

| No. | Ret. Time(min) | Area%   |
|-----|----------------|---------|
| 1   | 10.297         | 0.6646  |
| 2   | 12.545         | 0.1969  |
| 3   | 13.747         | 99.1385 |

Purity: 99.1385%

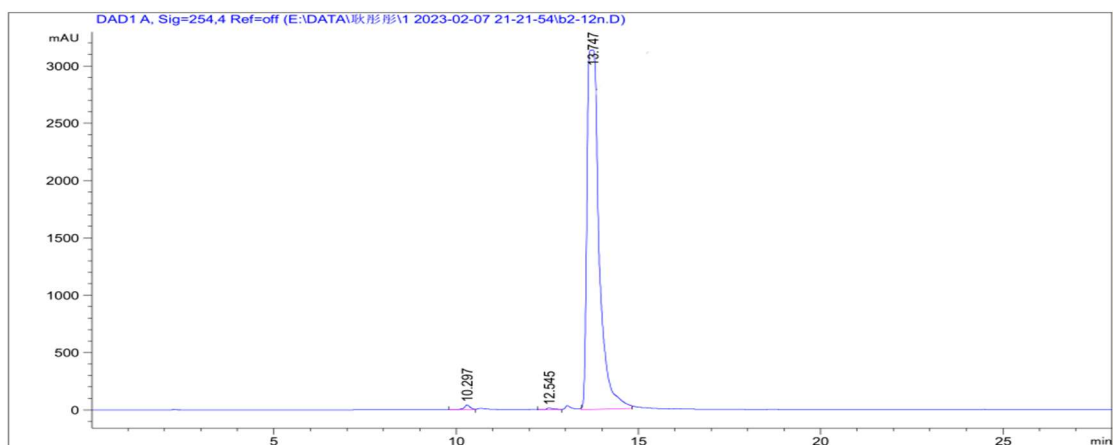

HPLC of **B2-12N**

| No. | Ret. Time(min) | Area%   |
|-----|----------------|---------|
| 1   | 12.438         | 0.5648  |
| 2   | 14.096         | 0.9196  |
| 3   | 19.152         | 97.7393 |
| 4   | 19.762         | 0.7762  |

Purity: 97.7393%

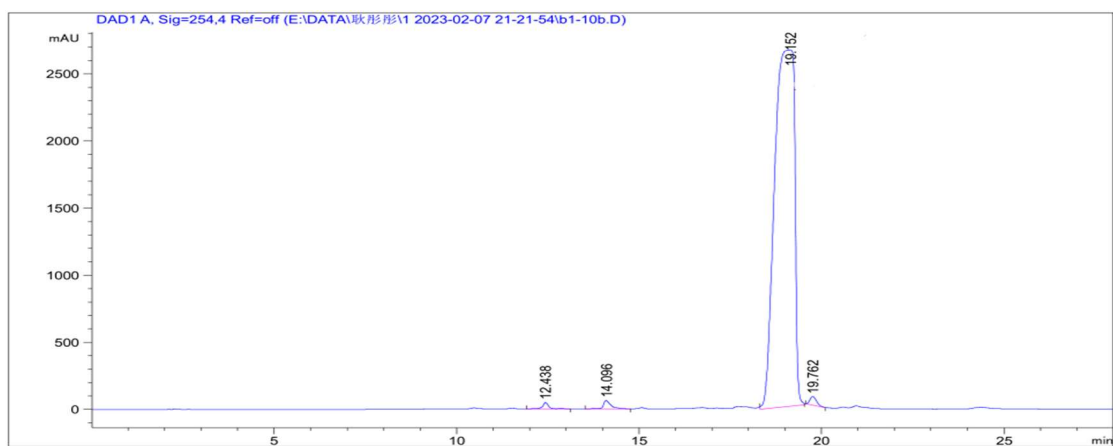

HPLC of **B1-10B**

| No. | Ret. Time(min) | Area%   |
|-----|----------------|---------|
| 1   | 11.288         | 0.6866  |
| 2   | 15.535         | 99.3134 |

Purity: 99.3134%

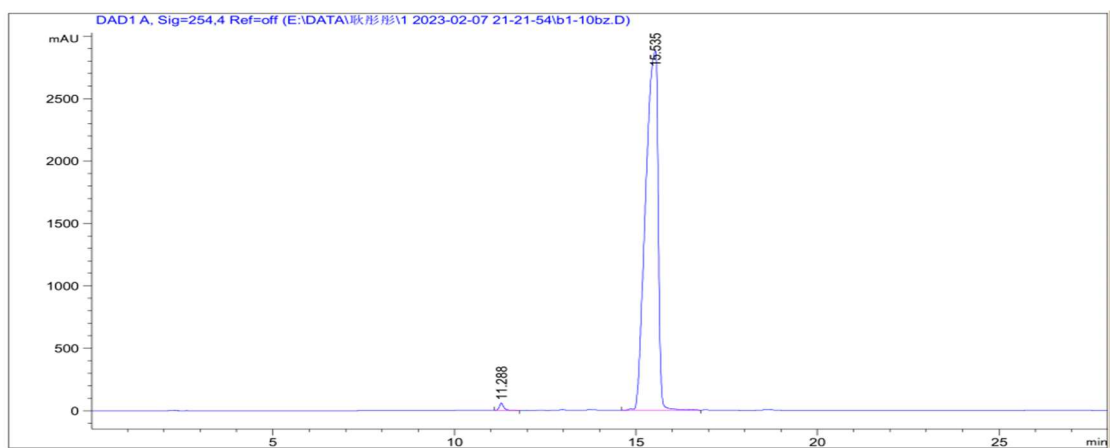

HPLC of **B1-10BZ**
